# Supplementary material for: Classifying software security requirements into confidentiality, integrity, and availability using machine learning approaches
Source: PeerJ Comput Sci. 2024 Nov 26;10:e2554. doi: 10.7717/peerj-cs.2554 (PMC11623117; doi:10.7717/peerj-cs.2554)
Supplement: Supplemental Information 1 [file peerj-cs-10-2554-s001.xlsx]

## Sheet: Sheet1
Requirements	svm	knn	rf	gb	bnb	class
Successful authentication is a prerequisite for the processing of any on-line or offline CEPS transaction;sec	CON	CON	CON	CON	CON	CON
On-line authentication must take place between the card issuer and the CEP card for load, unload, and currency exchange transactions;sec, ,	CON	CON	CON	CON	CON	CON
The card issuer and the CEP card share a secret key to generate and verify MACs;sec, , , ,	CON	CON	CON	CON	CON	CON
Off-line authentication must take place between a PSAM in the POS device and the CEP card for purchase and cancel last purchase transactions;sec, , , ,	CON	CON	CON	CON	CON	CON
The card and the PSAM must use a public key algorithm for mutual authentication and session key exchange, as no permanent shared secret key may exist between the CEP card and the PSAM;sec, , ,	CON	CON	CON	CON	CON	CON
To load value into a slot of the CEP card securely, the load device establishes a connection between the issuer and the CEP card;sec, , ,	CON	AVA	INT	CON	CON	CON
The card should use a unique diversified secret key, personalized into the card, to generate and authenticate transaction signatures;sec, ,	CON	CON	CON	CON	CON	CON
If this is not a cash load, the funds issuer needs to verify that the funds are requested by the legitimate account owner, which is normally done by the presentation of an enciphered PIN;sec, ,	CON	CON	CON	CON	CON	CON
The card issuer needs to ensure that the load acquirer is guaranteeing payment for the electronic value, and that the card is authentic;sec, , ,	CON	CON	CON	CON	CON	CON
The load acquirer needs to ensure that the issuer is the true owner of the card, and, in the case of an apparent failure of the load, the load acquirer needs the card presented to authenticate the failure;sec,	CON	CON	CON	CON	CON	CON
The load device sends S1 in an authorization request to the issuer;sec, , , ,	CON	CON	CON	CON	CON	CON
The load device also provides for verification of the identity of the cardholder (with either on-line or off-line PIN verification) and forwards verification data in the authorization request;sec, , , ,	CON	CON	CON	CON	CON	CON
The issuer validates S1 to authenticate the card and the data to be used in the transaction;sec, , , ,	CON	CON	CON	CON	CON	CON
The issuer sends S2 to the load acquirer in the authorization response message;sec, , , ,	CON	CON	CON	CON	CON	CON
Unloads are permitted only to an account controlled by the card issuer and are performed only at a load device under the control of the card issuer;sec, , , ,	CON	CON	CON	CON	CON	CON
The cardholder must have an account relationship with the card issuer, and funds removed from the card are credited to the cardholder account only after the card issuer authenticates the card;sec, , ,	CON	CON	CON	CON	CON	CON
The issuer needs only to authenticate the card, and the card needs only to authenticate the issuer and that the data is the same as used by the issuer;sec, , ,	CON	CON	CON	CON	CON	CON
The card generates S1, using data from the card and load device, and sends S1 to the card issuer to authenticate the card and the data that is to be used in the transaction;sec, ,	CON	CON	CON	CON	CON	CON
The card issuer generates S2, which is sent to the card to allow the card to validate the card issuerÉ??s authenticity and to ensure that the data used by the card in the transaction is the same as the card issuer intended;sec, , ,	CON	CON	INT	CON	INT	CON
In the case of an unsuccessful completion, exception processing outlined in the On-line Exception Processing section is performed;nonsec, , ,	INT	AVA	AVA	INT	INT	INT
During a purchase transaction, the CEP card must ensure that it is dealing with an authentic POS device, and it must generate a signature to allow the card issuer to verify the integrity of the transaction;sec, ,	CON	CON	CON	CON	CON	CON
The POS device must ensure that it is dealing with an authentic card, and guarantee integrity of transactions and batches to the merchant acquirer;sec, , ,	CON	CON	INT	CON	CON	CON
In the case of a reversal, the CEP card must re-authenticate the PSAM;sec, , ,	CON	INT	CON	CON	CON	CON
The card must ensure that the transaction is performed by the same POS device as was used for the purchase being canceled, and that the amount of the cancellation is the same as the amount of the purchase, or, in the case of an incremental purchase, the same as the amount of the last step;sec	CON	CON	INT	INT	INT	INT
During a Cancel Last Purchase transaction, the CEP card is authenticated by the PSAM in the POS device;sec, , ,	CON	CON	CON	CON	CON	CON
The PSAM authenticates that the purchase transaction being canceled was performed by the PSAM, and that the transaction being canceled is part of the active batch;sec, , ,	CON	CON	CON	CON	INT	CON
The card issuer and the merchant acquirer also authenticate the transaction when they receive it;sec, , , ,	CON	CON	CON	CON	CON	CON
Transmissions between host systems should be protected by MACs based on unique keys that are shared by the nodes involved;sec, , , ,	CON	CON	CON	CON	CON	CON
The transaction signatures ensure end to end integrity of transmitted data for load, unload, and currency exchange transactions;sec, ,	CON	CON	CON	CON	INT	CON
These totals are used by the merchant acquirer to ensure the integrity of the batch;sec, , , ,	INT	CON	INT	INT	INT	INT
The count and amount of the transactions in the batch must be protected by the S4 MAC, This information is not part of the card issuerÉ??s verification process;sec, , ,	CON	CON	INT	INT	INT	INT
Scheme providers must assign unique identifying numbers to merchant acquirers who provide PSAMs;sec, , , ,	CON	CON	INT	CON	CON	CON
These merchant acquirers must then assign unique identifiers to PSAMs;sec, , , ,	CON	CON	CON	CON	CON	CON
Each PSAM must maintain a transaction count, The unique PSAM ID and the transaction count are used during a conversation with a CEP card. The transaction count must not be reset during the life of the PSAM;sec, , ,	CON	CON	INT	CON	INT	CON
Contain the CA public RSA key, the PSAMÉ??s private RSA key and optionally the certificates that the POS device uses to perform mutual authentication with the CEP card;sec, , ,	CON	CON	CON	CON	CON	CON
Perform the calculation required to generate a signature using the PSAMÉ??s private RSA key, to allow the CEP card to validate the PSAM;sec, , ,	CON	CON	CON	CON	CON	CON
Contain the latest transaction count and amount of batches that have not been deleted from the POS device by the merchant or merchant acquirer;nonsec, , , ,	INT	INT	INT	INT	INT	INT
Contain the details of a transaction between the initialize command for that transaction and the initialize command for the next transaction;nonsec, , , ,	INT	CON	INT	INT	INT	INT
Be the entity that maintains control over the flow of a transaction, ensuring that all security is enforced;sec, , ,	CON	CON	CON	CON	INT	CON
Perform the verification of signatures and certificates during a purchase and cancel last purchase transaction;sec, , , ,	CON	CON	CON	CON	CON	CON
Ensure that each batch of transactions is cleared and settled once and only once;nonsec, , , ,	CON	INT	INT	INT	INT	INT
Send transactions to card issuers or their processors in a standard format defined in agreement with the scheme provider;nonsec, , , ,	CON	CON	INT	CON	INT	CON
Ensure that CA public keys, aggregation parameters, blocking lists and issuer certificate revocation lists from the scheme providers are sent to the POS devices;sec, ,	CON	AVA	CON	CON	CON	CON
Share one or more MAC keys with connecting processors, create a MAC on each transmission sent to another processor, and verify the MAC on each transmission received from another processor;sec, ,	CON	CON	INT	CON	INT	CON
Send transactions to other processors in a standard format defined in agreement with the scheme provider;nonsec, , , ,	CON	CON	INT	INT	CON	CON
If a supported scheme provider has a dispute resolution process, participate in that dispute resolution process with connecting processors to resolve any issues related to invalid transactions. These resolution processes should include a mechanism for repayment of funds associated with invalid transactions;nonsec, , ,	CON	CON	CON	CON	CON	CON
The scheme provider must ensure that the entire process between merchants, merchant acquirers, card issuers, and processors is auditable and reconcilable;sec,	CON	CON	INT	INT	INT	INT
If errors in the card issuer MAC are discovered by the card issuer during its processing of the transactions, a dispute mechanism, established by the scheme provider, may be used to have money refunded;sec,	INT	AVA	CON	INT	INT	INT
If a scheme provider establishes a central error repository, all transactions for the scheme with MAC errors must be sent to that central error repository whether or not they are submitted to the dispute process;sec, , ,	INT	AVA	INT	INT	INT	INT
Payment for a transaction is only required when a detail transaction is submitted for payment, A merchant acquirer may choose to pay the merchant using the batch total;nonsec, , ,	CON	CON	CON	CON	CON	CON
The timing of payment to the merchant must be established between the merchant and the merchant acquirer;nonsec, , , ,	CON	CON	INT	CON	CON	CON
A purchase transaction may be reversed, prior to the removal of the CEP card from the POS device, by sending a purchase reversal command to the CEP card, The CEP card must authenticate the PSAM using certificates previously exchanged;sec,	CON	CON	CON	CON	CON	CON
The amount to be reversed is the amount of the last step of the transaction. The reversal command sent to the CEP card contains a S2 MAC computed by the PSAM;sec, , , ,	INT	INT	INT	INT	INT	INT
The PSAM in the POS device generates a merchant acquirer S5 MAC for the transaction, computes a new S4 MAC on the updated batch total count and amount, and logs the transaction;sec, ,	INT	INT	INT	INT	INT	INT
The CEP card authenticates the PSAM using the certificates previously received and the S2, The CEP card increments the value of the purse and logs the transaction;sec, , ,	CON	CON	CON	CON	CON	CON
The CEP card sends a response to the reversal command to the POS device. The reversal is considered to be successful even in the event of a negative response or no response from the CEP card;nonsec, , , ,	INT	INT	INT	INT	INT	INT
After the CEP card is inserted in the POS device, the POS device initiates the cancel last purchase transaction;nonsec, , ,	CON	CON	INT	CON	CON	CON
If the POS device supports multiple applications or multiple transaction types, an interaction between the terminal and consumer or sales agent determines the CEP application and the function to be performed (cancel last purchase transaction);nonsec, , ,	CON	CON	INT	CON	INT	CON
The CEP card verifies that the PSAM is the PSAM used in the original transaction, computes a S1 MAC using the same DES session key that was used for the purchase transaction being cancelled, and responds to the POS device with the S1 and the identification of the last transaction. If the purchase transaction to be canceled has been canceled or is not part of the active batch, the command is not a…	CON	CON	CON	CON	INT	CON
The PSAM either retrieves or re-derives the DES session key used for the purchase transaction being cancelled. The POS device authenticates the CEP card using this key and the S1 MAC;sec, , , ,	CON	CON	CON	CON	CON	CON
The PSAM in the POS device generates a merchant acquirer S5 MAC for the transaction and a new S4 MAC for the batch total count and amount and logs the transaction. The amount of the canceled last purchase transaction is subtracted from the header amount. The transaction is kept in a data store associated with the POS device until the merchant acquirer collects it;sec, , , ,	INT	CON	INT	INT	INT	INT
A credit command, which contains the S2 MAC computed by the PSAM using the session key, is sent to the CEP card;sec, ,	CON	CON	INT	CON	CON	CON
The CEP card authenticates the terminal using the S2 MAC and the session key from the purchase transaction being cancelled. The CEP card increments the value of the purse and logs the transaction. The CEP card verifies that the cancellation amount is equal to the amount of the last step of the purchase transaction;sec, , , ,	CON	CON	CON	CON	CON	CON
A transaction collection process must exist. Data being transmitted from the POS devices must be transmitted in a manner that ensures integrity of the data;sec, , , ,	INT	CON	INT	INT	INT	INT
The batch is sent to the merchant acquirer. Delivery may involve transmission to multiple intermediate locations or it may be direct to the merchant acquirer;nonsec, , , ,	INT	AVA	INT	AVA	INT	INT
The merchant acquirer validates the batch to ensure that it has been transmitted correctly and enters it into the log;nonsec, , , ,	INT	CON	INT	INT	INT	INT
If the business rules allow this transaction is to be aggregated, the PSAM must determine if it has an aggregation record for the card issuer. If the PSAM does not have an aggregation record for the card issuer, a new aggregation record for the card issuer must be created;nonsec, ,	CON	CON	CON	CON	INT	CON
The aggregated totals by card issuer must be transmitted to the merchant acquirer at the same time and manner as the non-aggregated detail transactions in the batch;nonsec, , , ,	CON	CON	INT	CON	INT	CON
Each POS transaction completed at the POS device is given a S5 MAC by the PSAM, which is used by the merchant acquirer to validate that the transactions were made at a POS device with a valid PSAM. The batch total count and amount must be protected by the S4 MAC, which must also be validated by the merchant acquirer;sec, ,	INT	CON	INT	INT	INT	INT
The merchant acquirer validates the PSAMÉ??s MACs prior to accepting the POS transactions for payment. In addition, selected data elements are validated to ensure correct processing by the POS device and its PSAM;sec, , ,	CON	CON	INT	INT	INT	INT
Each purchase transaction is signed by the CEP card with a S6 MAC, which is used by the card issuer to validate that the transaction was made with a legitimate, not counterfeit, CEP card. The card issuer validates the CEP cardÉ??s MAC;sec,	CON	CON	CON	CON	CON	CON
Payment decisions are based on signature validations, scheme provider rules, and merchant and merchant acquirer agreements;sec, ,	CON	CON	CON	CON	INT	CON
After investigation, if the merchant acquirer decides, based on scheme rules, to accept the transactions, a method must exist to settle them and forward them to the card issuer;nonsec	CON	CON	CON	INT	CON	CON
A transaction that passes merchant acquirer validations and is forwarded to the card issuer is paid for by the card issuer. If the transaction does not pass card issuer validations, the card issuer may follow the scheme providerÉ??s dispute procedures;nonsec, , ,	CON	CON	CON	CON	CON	CON
Pay on detail is the default payment arrangement for merchant acquirers to provide payment to their merchants. In this arrangement, the merchant acquirer relies on the POS transaction S5 MAC to determine acceptance. Merchants are paid only for valid POS transactions;sec, , ,	CON	CON	INT	INT	INT	INT
POS transactions that were rejected for payment by the merchant acquirer are flagged with an error code indicating the type of validation failure and are forwarded to the card issuer for CEP card history information only;nonsec, , , ,	INT	CON	INT	INT	INT	INT
All load transactions are on-line transactions. Authorization of funds for load transactions must require a form of cardholder verification. The load device must support on-line encrypted PIN or off-line PIN verification;sec, , , ,	CON	CON	CON	CON	CON	CON
Off-line PIN verification must include both encrypted and unencrypted PIN;sec, , , ,	CON	CON	CON	CON	CON	CON
The card verification method indicator (CVMI) in the CEP card must specify support of online PIN verification and at least one method of off-line PIN verification (encrypted or unencrypted);sec, , , ,	CON	CON	CON	CON	CON	CON
Since these transactions are on-line to the issuer, the issuer has the opportunity to lock the card or the application. These transactions are not available to a card that has already been locked;sec, , ,	CON	INT	CON	CON	CON	CON
Card issuers must inform their cardholders as to which currencies they support in electronic purses;nonsec, , , ,	CON	CON	CON	CON	CON	CON
Load acquirers must determine the currencies that they must support for load transaction;nonsec, , , ,	CON	CON	CON	CON	CON	CON
The CEP application must contain data that indicates the presence of a linked financial institution. If a linked financial institution is established for the CEP application, then linked loads must be allowed and data in the application must indicate whether linked loads are supported;nonsec, , ,	CON	AVA	CON	CON	CON	CON
Flexibility is required to accommodate the variety of environments where unlinked loads may be implemented. As a result, the design specification must not preclude dual-leg transactions** from taking place either sequentially or in parallel. The design of a given implementation will vary depending on the device, host, and network capabilities;nonsec,	AVA	AVA	AVA	AVA	AVA	AVA
Unload and currency exchange transactions are optional for CEP card issuers. The CEP card must indicate whether the card issuer supports these transactions. However, if a card issuer issues multi-currency capable cards, it must provide its cardholder with a facility to remove any remaining value. As a result, if a card issuer supports loading of multiple currencies onto a card, then it must suppo…	CON	AVA	CON	AVA	AVA	AVA
The card issuer must establish its policies for assigning and adjusting slot maximum balances. These policies may require the card issuer to maintain a card database;nonsec, , , ,	CON	CON	CON	AVA	AVA	CON
Currency exchange rate fluctuations may increase the card issuers liability. The card issuer must be able to adjust maximum balances to bring them in line with their policies. The card issuer may update the maximum balances as part of a load, a partial unload, and a currency exchange transaction. On a currency exchange transaction, only the É??toÉ?ù currency maximum balance may be updated;nonsec,	CON	CON	CON	CON	INT	CON
A CEP card may contain currencies that the load acquirer does not support. As a result, load devices must use the alphabetic issuer-supplied currency code and currency exponent from the CEP slot(s) to display the source amounts for the currency conversion transaction;nonsec, , ,	CON	AVA	INT	CON	CON	CON
Card issuers must provide an alphabetic currency code in each message that establishes a new currency. This alphabetic currency code and the currency exponent will be used by the load device to display currency balances. This allows the cardholder to identify the currency being displayed;nonsec, , , ,	CON	CON	CON	CON	INT	CON
Script messages that conform to EMV specifications may be included as part of load, unload and currency exchange messages from the card issuer to the CEP card. An update key must be used when card parameters are changed. Script messages may be sent to the CEP card either before or after the credit for load, debit of unload and currency exchange commands;nonsec, ,	CON	CON	CON	CON	INT	CON
All on-line messages must have the ability to include card issuer discretionary data from the CEP card;nonsec, , , ,	CON	CON	CON	CON	CON	CON
The card issuer must notify the cardholder if the assessment of service fees by the card issuer during the currency exchange transaction may result in a balance of zero after the transaction has completed;nonsec, , , ,	CON	CON	CON	CON	CON	CON
The card issuer must have the ability to deactivate a CEP application in the response to a load or currency exchange transaction;nonsec, , , ,	CON	AVA	CON	CON	CON	CON
The CEP card may support multiple currencies. Each currency occupies a É??slotÉ?ù within the CEP. The slots are defined by the currency supported. The currency for an individual slot is determined during load or currency exchange. Currency exchange could apply to a single slot, and then only for the total balance;nonsec, , ,	CON	CON	CON	AVA	CON	CON
It is a card issuerÉ??s decision to determine the currencies that are allowed to occupy slots in the CEP card. This decision is made by the card issuer during the load or currency exchange transaction, by approving or rejecting the request to authorize the transaction;nonsec, , ,	CON	CON	CON	CON	CON	CON
A single currency cannot occupy more than one slot. The CEP card must not permit a slot to be assigned a currency if another slot in the CEP card has already been assigned to that currency;nonsec, , , ,	CON	CON	CON	CON	CON	CON
The CEP card limits each slot to a maximum balance. The maximum balance for a slot is established when a currency is assigned to the slot, and is determined externally by the card issuer or by CEP card data which indicates a maximum balance in a reference currency. There is no requirement that all slot maximums have the same relative value, and there is no requirement for the card to maintain a m…	CON	CON	CON	CON	CON	CON
Only one version of the CA public key is required in the card. This requires that the PSAMs with which the CEP card exchanges cryptograms must be capable of generating and validating cryptograms using the relevant keys from all current cards;sec, , , ,	CON	CON	CON	CON	CON	CON
Two-way, or mutual, authentication, where the card authenticates the terminal and the terminal authenticates the card for each transaction, must be performed for off-line transactions;sec	CON	CON	CON	CON	CON	CON
For increased security and convenience, asymmetric cryptography must be used as the authentication security for off-line transactions;sec, , ,	CON	CON	CON	CON	CON	CON
The card must authenticate the terminal at the point of sale, ensuring that it is genuine and valid, and use a two-way authentication process;sec, ,	CON	CON	CON	CON	CON	CON
The terminal must authenticate the card and the transaction at the point of sale, ensuring that they are genuine and valid;sec, , ,	CON	CON	CON	CON	CON	CON
The terminal must participate in a two-way authentication process with the card;sec, , , ,	CON	CON	CON	CON	CON	CON
For cancel last purchase transactions, the terminal must validate the card and sign the cancellation;sec, , ,	CON	CON	CON	CON	CON	CON
The terminal must secure transactions by retaining the cardÉ??s symmetric MACing key signature as part of the transaction;sec, , , ,	CON	CON	CON	CON	CON	CON
The terminal must generate a symmetric MACing key signature and send it to the merchant acquirer;sec, , , ,	CON	CON	CON	CON	CON	CON
Incremental purchase transactions must use two-way authentication for the initial session authentication, and at least one-way, with the terminal authenticating the card, for the remaining increments or some of the remaining increments;sec,	CON	CON	CON	CON	CON	CON
Load and unload functions must be authenticated using end-to-end security between the card and the card issuer;sec, , , ,	CON	CON	CON	CON	CON	CON
The issuer host must authenticate the card upon the load/unload request;sec, , , ,	CON	CON	CON	CON	CON	CON
The card must authenticate the issuer host upon the response to the request;sec, , , ,	CON	CON	CON	CON	CON	CON
A proof must be sent to the load acquirer that a load or unload occurred to avoid repudiation;sec, , , ,	INT	INT	INT	INT	INT	INT
The management of keys must be accomplished in a secure, certified environment;sec, , ,	CON	CON	CON	CON	CON	CON
There may be multiple certification authorities that manage keys for the system, including the possibility of one overall highest level certification authority (perhaps on an international level), and domestic certification authorities for each country or region;sec, ,	CON	AVA	CON	CON	CON	CON
The system must protect the integrity of key transaction data including transaction identification, currency code and amount. If tampering is suspected, the system must cause the transaction to fail;sec, ,	INT	INT	INT	INT	INT	INT
Expired cards must not be used for loading electronic value;nonsec, , , ,	CON	INT	CON	CON	CON	CON
The time period during which a cardholder can unload electronic value, perform a purchase or a currency exchange from an expired card may be determined by each issuer;nonsec, , ,	CON	INT	CON	CON	AVA	CON
Consumers must be able to load electronic value to their cards at any participating load device, regardless of the location, provided that the currency that is requested is supported by the acquirer and the card issuer;nonsec, ,	CON	CON	CON	CON	AVA	CON
Funds issuers must accept funds authorization requests, regardless of the load currency type, as permitted;sec, ,	CON	CON	CON	CON	CON	CON
Load devices that are available to the general public should support multiple sources of funding and support both linked and unlinked loads;nonsec, , , ,	AVA	AVA	INT	AVA	AVA	AVA
Authorizations for load transactions require a form of cardholder authentication for funds requests;sec, , , ,	CON	CON	CON	CON	CON	CON
The load device must support on-line PIN encryption or off-line PIN verification;sec, , , ,	CON	CON	CON	CON	CON	CON
The load device which supports only off-line PIN verification must support both the off-line PIN encryption method and the off-line PIN plain text verification method as defined in EMV;sec, , , ,	CON	CON	CON	CON	CON	CON
Unload transactions do not require cardholder authentication. (However, an acquirerÉ??s devices may be configured such that authentication is required for access.);sec, , ,	CON	CON	CON	CON	CON	CON
The architecture for the electronic purse should not preclude the eventual deployment of a variety of devices to meet the needs of many card acceptance environments. Unload must not be precluded from being supported on any or all of these devices at the option of the acquirer;nonsec, , , ,	CON	CON	AVA	CON	CON	CON
All applications under the GlobalPlatform shall be implemented in a hardware-neutral secure runtime environment ;sec	CON	CON	CON	CON	CON	CON
The run time environment shall be responsible to separate secure storage for the application code and data ;sec, , , , , , , , , ,	CON	CON	CON	CON	CON	CON
The run time environment shall responsible to establish communication services between card and off-card entities;nonsec, , , , , , , , , ,	CON	CON	CON	CON	CON	CON
Security domain shall ensure complete seperation of keys among the card issuers and other application providers;sec, , , , , , , , , ,	CON	CON	CON	CON	CON	CON
"Security Domains shall support security services such as key handling, encryption, decryption, digital signature generation and verification for their providers' such as card issuer, applicaiton providers and controlling authority";sec, , , , , , , , , ,	CON	CON	CON	CON	CON	CON
The GlobalPlatform Environment(OPEN) shall responsible for to provide an API to applications, command dispatch, Application selection, (optional) logical channel management, and Card Content management;nonsec, , , , , ,	CON	AVA	INT	CON	CON	CON
The OPEN shall responsible to load application code, card content and memory management ;nonsec, , , , , , , , ,	CON	CON	CON	CON	CON	CON
The OPEN shall responsible to enforce security principles defined for Card Content management.;sec, , , , , , , , , ,	CON	CON	CON	CON	CON	CON
The OPEN shall own the GlobalPlatform register that contains information for managing the card, Executable Load Files, Applications, Security Domain associations, and privileges.;nonsec, , , , , ,	CON	CON	CON	CON	CON	CON
The GlobalPlatform API shall provides services to the application such as card verification and security services ;sec, , , , , , , , , ,	CON	CON	CON	CON	CON	CON
The GlobalPlatform API shall provides services to the card content management such as card locking and application life cycle state update ;nonsec, , , , , , , , , ,	CON	CON	CON	CON	CON	CON
The primary goal of the GlobalPlatform is to ensure the security and integrity of the card's components for the life of the card. These components are The runtime environment, The OPEN, The Issuer Security Domain, Supplementary Security Domains, The Applications.;sec, , , , , ,	CON	CON	CON	CON	CON	CON
To ensure card security and integrity, the GlobalPlatform is designed to support a range of secure mechanisms for: Data integrity, Resource availability, Confidentiality, Authentication.;sec, , , , , ,	CON	CON	CON	CON	CON	CON
The Card Issuer is responsible for Generating and loading the Issuer Security Domain keys, ;sec, , , , , , , , ,	CON	CON	CON	CON	CON	CON
"The Card Issuer is responsible for Enforcing standards and policies for Application Providers governing all aspects of Applications to be provided to the Card Issuer or operated on the Card Issuer's cards,";sec, , , , , , , , , ,	CON	CON	CON	CON	CON	CON
"The Card Issuer is responsible for Working with Application Providers to create and initialize Security Domains other than the Issuer Security Domain,";nonsec, , , , , , , , , ,	CON	CON	CON	CON	CON	CON
"The Card Issuer is responsible for Determining policy with regards to card and Application Life Cycle management, velocity checking levels, privileges, and other security parameters,";nonsec, , , , , , , , , ,	CON	CON	CON	CON	CON	CON
The Card Issuer is responsible for Managing the application code loading and installing both on a Pre-Issuance and Post-Issuance basis;nonsec, , , , , , , , , ,	CON	CON	CON	CON	CON	CON
The Card Issuer is responsible for Cryptographically authorizing load, install, and extradition to be performed by Application Providers.;sec, , , , , , , ,	CON	CON	INT	CON	INT	CON
"The Application Provider is responsible for Generating the keys for its own Security Domains or obtaining Security Domain keys from a trusted third party,";sec, , , , , , , , , ,	INT	AVA	AVA	INT	INT	INT
The Application Provider is responsible for Working with the Card Issuer to load generated keys into the Application Provider's Security Domain, ;sec, , , , , , , , ,	CON	CON	CON	CON	CON	CON
The Application Provider is responsible for Providing applications that meet the Card Issuer's security standards and policies, ;nonsec, , , , , , , , ,	CON	CON	INT	CON	CON	CON
"The Application Provider is responsible for Providing load file data block signatures according to its own security policy for integrity and source authenticity,";sec, , , , , , , , , ,	CON	INT	CON	CON	CON	CON
The Application Provider is responsible for Obtaining pre-authorization for load, install, and extradition from the Card Issuer, ;nonsec, , , , , , ,	CON	CON	INT	INT	INT	INT
The Application Provider is responsible for Returning receipts for load, install, delete, and extradition, according to the Card Issuer's policy.;nonsec, , , , , ,	CON	CON	CON	CON	CON	CON
"A Controlling Authority is responsible for Generating the keys for its own Security Domain or obtaining Security Domain keys from a trusted third party,";sec, , , , , , , , , ,	CON	CON	CON	CON	INT	CON
A Controlling Authority is responsible for Working with the Card Issuer to load generated keys into the Controlling Authority's Security Domain, ;sec, , , , , , , , ,	CON	CON	CON	CON	CON	CON
"A Controlling Authority is responsible for Providing load file data block signatures according to its own security policy for integrity and source authenticity.";sec, , , , , , , , , ,	CON	CON	CON	CON	CON	CON
"The runtime environment is responsible for Providing an interface to all Applications that ensures that the runtime environment security mechanisms cannot be bypassed, deactivated, corrupted or otherwise circumvented,";sec, , , , , , , , , ,	CON	CON	CON	CON	INT	CON
The runtime environment is responsible for Performing secure memory management;sec, , , , , , , , , ,	INT	CON	INT	INT	INT	INT
"Secure memory management shall ensure that Each application's code and data (including transient session data) as well as the runtime environment itself and its data (including transient session data) is protected from unauthorized access from within the card,";sec, , , , , , , , , ,	CON	CON	INT	INT	INT	INT
"Secure memory management shall ensure that When more than one logical channel is supported, each concurrently selected Application's code and data (including transient session data) as well as the runtime environment itself and its data (including transient session data) is protected from unauthorized access from within the card,";sec, , , , , , , , , ,	CON	CON	INT	CON	CON	CON
Secure memory management shall ensure that The previous contents of the memory is not accessible when that memory is reused, ;sec, , , , , , , , ,	CON	CON	CON	CON	CON	CON
"Secure memory management shall ensure that The memory recovery process is secure and consistent in case of a loss of power or withdrawal of the card from the card reader while an operation is in progress,";sec, , , , , , , , , ,	CON	CON	INT	CON	INT	CON
"The runtime environment is responsible for Providing communication services with off-card entities that ensures the proper transmission (according to the specific communication protocol rules) of unaltered command and response messages.";sec, , , , , , , , , ,	CON	CON	CON	CON	CON	CON
Each Trusted Framework present on the card shall Check the application access rules of the inter-acting Applications according to their respective privileges, ;sec, , , , , , , , ,	CON	CON	CON	CON	CON	CON
"Each Trusted Framework present on the card shall Enforce the Trusted Framework security rules for inter-application communication, including the rules, defined in appendix G,";sec, , , , , , , , , ,	INT	INT	INT	INT	INT	INT
Each Trusted Framework present on the card shall Ensure that incoming messages are properly routed unaltered to their intended destinations, ;sec, , , , , , , , ,	INT	CON	INT	INT	INT	INT
"Each Trusted Framework present on the card shall Ensure that any response messages are properly returned unaltered (except for any cryptographic protection) to the original receiver of the incoming message.";sec, , , , , , , , , ,	CON	CON	CON	CON	INT	CON
"The OPEN shall Provide an interface to all Applications that ensures that the GlobalPlatform security mechanism cannot be bypassed, deactivated, corrupted or otherwise circumvented,";sec, , , , , , , , , ,	CON	CON	CON	CON	CON	CON
The OPEN shall Check application access rules according to the Applications' privileges, ;sec, , , , , , , , ,	CON	INT	INT	INT	INT	INT
The OPEN shall Manage card and Application Life Cycle;nonsec, , , , , , , , , ,	CON	CON	INT	CON	INT	CON
The OPEN shall Ensure that the Card Content changes are authorized by the Card Issuer, ;sec, , , , , , , , ,	CON	AVA	CON	CON	CON	CON
The OPEN shall Ensure that application code has been signed by the Controlling Authority represented on the card, ;sec, , , , , , , , ,	CON	CON	INT	CON	INT	CON
The OPEN shall Ensure that application code has been signed by Application Providers represented on the card, if required.;sec, , , , , , , , ,	CON	CON	INT	INT	CON	CON
Security Domains enforce the security policies of their off-card Security Domain Provider.;sec, , , , , , , , , ,	CON	CON	CON	CON	CON	CON
"When applicable a Security Domain shall Communicate with off-card entities in accordance with its Security Domain Provider's security policy in Pre-Issuance and Post-Issuance,";sec, , , , , , , , , ,	CON	CON	INT	INT	INT	INT
When applicable a Security Domain shall Manage on-card data securely, ;sec, , , , , , , , ,	INT	AVA	CON	INT	INT	INT
"When applicable a Security Domain shall Provide cryptographic protection services for its own Applications during their personalization and optionally during their subsequent operation,";sec, , , , , , , , , ,	INT	AVA	INT	INT	INT	INT
When applicable a Security Domain shall Request the OPEN to load, install, extradite, and delete card content, ;nonsec, , , , , ,	CON	CON	CON	CON	CON	CON
When applicable a Security Domain shall Return to the off-card entity any receipt for load, install, extradition, and delete, ;nonsec, , , , , ,	CON	CON	INT	CON	CON	CON
When applicable a Security Domain shall Verify the authorization for Card Content changes initiated by an off-card authority, ;sec, , , , , , , , ,	CON	CON	CON	CON	CON	CON
When applicable a Security Domain shall Generate receipts for load, install, extradition, and delete, ;nonsec, , , , , ,	INT	INT	INT	INT	INT	INT
When applicable a Security Domain shall Verify the load file data block signature when requested by the OPEN.;sec, , , , , , , , , ,	INT	INT	INT	INT	INT	INT
A Global Services Application shall Be able to provide services to other Applications, such as CVM services, ;nonsec, , , , , , , ,	CON	CON	CON	CON	CON	CON
A Global Services Application shall Hold the Global Services application-related data securely, ;sec, , , , , , , , ,	INT	INT	INT	INT	INT	INT
A Global Services Application shall Perform internal security measures as required by the service.;sec, , , , , , , , , ,	CON	CON	INT	CON	CON	CON
Applications should Expose only data and resources that are necessary for proper application functionality;sec, , , , , , , , , ,	CON	CON	INT	CON	INT	CON
Applications should Perform internal security measures required by the Application Provider;sec, , , , , , , , , ,	CON	CON	CON	CON	INT	CON
The back-end systems (multiple back-end systems may exist for a single card), which communicate with the cards, perform the verifications, and manage the off-card key databases, also shall be trusted.;sec, , , , , ,	CON	CON	CON	CON	CON	CON
"One of the major requirements for a GlobalPlatform card is the ability to provide a minimum level of cryptographic functionality. This cryptography is, for example, used for the generation of signatures, and is available for use by the Applications present on the card.";sec, , , , , , , , , ,	INT	CON	INT	INT	INT	INT
The Issuer Security Domain shall implement one Secure Channel Protocol.;sec, , , , , , , , , ,	CON	CON	INT	CON	CON	CON
A Security Domain other than the Issuer Security Domain shall implement [at least] one Secure Channel Protocol.;sec, , , , , , , , , ,	CON	CON	CON	CON	CON	CON
A GlobalPlatform card should support symmetric cryptography such as the Data Encryption Standard (DES) algorithm.;sec, , , , , , , , , ,	INT	CON	INT	INT	INT	INT
A GlobalPlatform card may also support asymmetric cryptography such as the Rivest / Shamir / Adleman (RSA) algorithm.;sec, , , , , , , , , ,	INT	AVA	INT	AVA	INT	INT
When present, services to encrypt and decrypt any pattern of data using these algorithms shall be available to Applications.;sec, , , , , , , , ,	INT	CON	INT	INT	INT	INT
"It is the responsibility of the Card Issuer or the Controlling Authority to set up the appropriate off-card procedures to comply with the governmental restrictions upon cryptography. Features to disable or restrict cryptography usage by Applications on a card are beyond the scope of this Specification.";sec, , , , , , , , , ,	CON	CON	CON	CON	INT	CON
The Load File Data Block Hash is intended to verify the integrity of a complete Load File Data Block when loaded to a GlobalPlatform card.;sec, , , , , , , , , ,	CON	CON	INT	CON	INT	CON
The Load File Data Block Hash is used in the computation of The Load File Data Block Signature;sec, , , , , , , , , ,	INT	CON	INT	INT	INT	INT
The Load File Data Block Hash is used in the computation of The Load Token;nonsec, , , , , , , , , ,	CON	CON	INT	INT	INT	INT
When present during the loading of a Load File to the card, each signature shall be verified by the appropriate Security Domain.;sec, , , , , , , , ,	CON	CON	CON	CON	CON	CON
Tokens shall be verified by the appropriate Security Domain.;sec, , , , , , , , , ,	CON	CON	CON	CON	INT	CON
The appropriate Security Domain may generate Receipts during Delegated Management.;nonsec, , , , , , , , , ,	CON	CON	CON	INT	CON	CON
A GlobalPlatform card may provide security services related to information exchanged between the card and an offcard entity.;nonsec, , , , , , , , , ,	CON	CON	CON	CON	CON	CON
The security level of the communication with an off-card entity does not necessarily apply to each individual message being transmitted but can only apply to the environment and/or context in which messages are transmitted.;nonsec, , , , , , , , , ,	CON	CON	INT	INT	INT	INT
The concept of the Life Cycle of the card (see section 5.1 - Card Life Cycle) may be used to determine the security level of the communication between the card and an off-card entity.;nonsec, , , , , , , , , ,	INT	CON	INT	INT	INT	INT
A GlobalPlatform card offers Entity authentication - in which the card or the off-card entity proves its authenticity to the other entity through a cryptographic exchange, ;sec, , , , , , , , ,	CON	CON	CON	CON	CON	CON
A GlobalPlatform card offers Integrity and authentication - in which the receiving entity (the card or off-card entity) ensures that the data being received from the sending entity (respectively the off-card entity or card) actually came from an authenticated entity in the correct sequence and has not been altered, ;sec, , , , , , , , ,	CON	CON	CON	CON	CON	CON
A GlobalPlatform card offers Confidentiality - in which data being transmitted from the sending entity (the off-card entity or card) to the receiving entity (respectively the card or off-card entity) is not viewable by an unauthenticated entity.;sec, , , , , , , , , ,	CON	CON	CON	CON	CON	CON
The life cycle models is responsible to functionality and security of Card, Executable Load Files, Executable Modules, Security Domains, and Applications.;sec, , , , , ,	CON	INT	CON	CON	CON	CON
The OPEN shall owns and maintains the Life Cycle information within the GlobalPlatform Registry ;nonsec, , , , , , , , , ,	CON	CON	CON	CON	CON	CON
The OPEN shall be responsible to maintain security and administration of the card and its content;sec, , , , , , , , , ,	CON	CON	CON	CON	CON	CON
At OP_READY state, the OPEN shall be available and ready for execution ;nonsec, , , , , , , , ,	CON	AVA	CON	CON	CON	CON
At OP_READY state, the runtime environment shall be ready for execution ;nonsec, , , , , , , , ,	AVA	AVA	AVA	AVA	AVA	AVA
At OP_READY state, issuer security domain shall be implicitly selected application for all card interfaces;nonsec, , , , , , , , ,	CON	AVA	CON	AVA	AVA	AVA
At OP_READY state, Executable Load Files that were included in Immutable Persistent Memory shall be registered in the GlobalPlatform Registry;nonsec, , , , , , , , ,	CON	CON	CON	AVA	AVA	CON
At OP_READY, initial key shall be available within the issuer security domain;nonsec, , , , , , , , ,	CON	CON	CON	CON	INT	CON
The off-card entity under the OP_READY state may insert Security Domain keys in order to maintain a cryptographic key separation from the Issuer Security Domain keys;sec, , , , , , , , , ,	CON	AVA	INT	CON	CON	CON
The SECURED state may be used to enforce the relevant security policies of the security domain and applications;sec, , , , , , , , , ,	CON	CON	CON	CON	INT	CON
The off-card entity under the SECURE state shall be used to ensure the availability of all keys by the issuer security domain;sec, , , , , , , , , ,	CON	CON	CON	CON	INT	CON
The CARD_LOCKED state shall has the ability to disable the selected security domain and application;nonsec, , , , , , , , , ,	CON	CON	CON	CON	CON	CON
The card under CARD_LOCKED state shall only allow the application to select the final application privilege;nonsec, , , , , , , , , ,	CON	CON	CON	CON	CON	CON
The Card Content changes including any type of data management (specifically Security Domain keys and data) shall not allowed in the CARD_LOCKED state.;nonsec, , , , , , , , , ,	CON	AVA	CON	CON	CON	CON
The state TERMINATED shall be used to permanently disable all card functionality with respect to any card content management and any life cycle changes.;nonsec, , , , , , , , , ,	CON	CON	CON	AVA	CON	CON
The GlobalPlatform Environment (OPEN) supports Command Dispatch functions (Application and Security Domain selection, (Optional) Logical channel management, Command dispatching) if the underlying runtime environment does not support them:;nonsec, , , , , , , ,	CON	CON	CON	CON	CON	CON
The GlobalPlatform Environment (OPEN) supports Card Content Management functions (Content verification, Content loading, Content installation, Content removal, Access control rules for card content management) if the underlying runtime environment does not support them:;nonsec, , , , , ,	CON	CON	CON	CON	CON	CON
The GlobalPlatform Environment (OPEN) supports Security Management functions (Security Domain locking and unlocking, Application locking and unlocking, Card locking and unlocking, Card termination, Privilege usage, Security Domain, privilege usage, Tracing and event logging) if the underlying runtime environment does not support them:;nonsec, , ,	CON	CON	CON	CON	CON	CON
The GlobalPlatform Environment (OPEN) supports GlobalPlatform Trusted Framework functions (Secure inter-application communication) if the underlying runtime environment does not support them:;nonsec, , , , , , , , , ,	CON	CON	CON	CON	CON	CON
The GlobalPlatform Registry is a data store required to support the various system functions of the GlobalPlatform.;nonsec, , , , , , , , , ,	CON	CON	CON	CON	CON	CON
Applications and Security Domains may access andor modify some content known or managed by the OPEN.;nonsec, , , , , , , , , ,	CON	CON	CON	CON	CON	CON
Depending on the relevant privileges of the requesting entity, the following services shall be provided by the OPEN Retrieving the Applications own Life Cycle State stored by the OPEN in the GlobalPlatform Registry, Retrieving the card Life Cycle State, Obtaining access to the services of the Security Domain associated with the Application, Transitioning the card Life Cycle State to CARD_LOCKED, …	CON	CON	CON	CON	CON	CON
The commands received by a GlobalPlatform card shall be processed by the OPEN or dispatched to the selected Application for processing.;nonsec, , , , , , , , , ,	CON	CON	CON	CON	CON	CON
The SELECT [by name] command is processed by the OPEN.;nonsec, , , , , , , , , ,	CON	CON	CON	CON	CON	CON
If the card is aware of logical channels but only supports the Basic Logical Channel, the OPEN shall respond with the appropriate error, ;nonsec, , , , , , , ,	CON	CON	CON	CON	CON	CON
If the card is aware of logical channels and supports at least one Supplementary Logical Channel, the OPEN shall process the command, ;nonsec, , , , , , , ,	CON	CON	CON	CON	CON	CON
If the card only supports the Basic Logical Channel and has no concept of logical channel support, the command shall be dispatched to the selected Application for processing.;nonsec, , , , , , , , ,	CON	CON	CON	CON	CON	CON
Any other type of command received shall be dispatched to the currently selected Application.;nonsec, , , , , , , , , ,	CON	CON	CON	CON	CON	CON
"Commands are either received on the Basic Logical Channel (logical channel number zero) or on a Supplementary Logical Channel (logical channel number other than zero). In compliance with ISO/IEC 7816-4, logical channel information shall be indicated in the class byte of the APDU command header.";nonsec, , , , , , , , , ,	CON	CON	CON	CON	CON	CON
"For all commands, if the command indicates a Supplementary Logical Channel that is not opened then: If the card only supports the Basic Logical Channel and has no concept of logical channel support, the command shall be dispatched to the selected Application for processing. If the card is aware of logical channels, the OPEN shall respond with the appropriate error. (This requirement may exclude …	CON	CON	CON	CON	CON	CON
For commands that are dispatched to an Application, it is the responsibility of the Application to correctly reject commands that it does not recognize, expect or cannot process.;nonsec, , , , , , , ,	CON	CON	CON	CON	CON	CON
The Issuer Security Domain shall have no multi-selection restrictions on cards that support multiple logical channels i.e. it shall be capable of being selected across multiple logical channels.;nonsec, , , , , , , , , ,	INT	INT	INT	INT	INT	INT
The Issuer Security Domain is by default the implicitly selectable Application on all logical channels of all card I/O interfaces supported by the card. Implicit selection on a specific logical channel of a specific card I/O interface may be assigned only if the Issuer Security Domain is the implicitly selectable Application on that logical channel of that card I/O interface and no other Locked A…	CON	CON	CON	CON	CON	CON
An Application installed or made selectable with a specific Implicit Selection parameter is registered in the GlobalPlatform Registry as the implicitly selectable Application on the logical channel(s) of the card I/O interface(s) indicated in the parameter if no other Application (other than the Issuer Security Domain) is already registered as implicitly selectable on that logical channel(s) of t…	CON	AVA	CON	CON	CON	CON
An Application installed or made selectable with the Card Reset privilege and no Implicit Selection parameter is registered in the GlobalPlatform Registry as the implicitly selectable Application on the Basic Logical Channel for all card I/O interfaces supported by the card if no other Application (other than the Issuer Security Domain) is already registered as implicitly selectable on the Basic …	INT	INT	INT	INT	INT	INT
If an Application implicitly selectable on specific logical channel(s) of specific card I/O interface(s) is deleted, the Issuer Security Domain becomes the implicitly selectable Application on that logical channel(s) of that card I/O interface(s).;nonsec, , , , , , , , ,	CON	INT	CON	CON	CON	CON
"The OPEN shall use the implicit selection registration of each Application for controlling the following runtime behavioral requirements: Identifying the Application which is implicitly selectable on the Basic Logical Channel of the current card I/O interface during the card reset or activation sequence, Identifying the Application which is implicitly selectable when opening on the current card …	CON	INT	CON	CON	AVA	CON
The Basic Logical Channel is the permanently available interface to a GlobalPlatform card and shall be supported by the OPEN.;nonsec, , , , , , , , , ,	CON	CON	CON	CON	AVA	CON
The OPEN shall support Application selection on the Basic Logical Channel via Implicit Selection following the card reset (see ISO/IEC 7816-3 for contact cards) or activation sequence (see ISO/IEC 14443-3 for contactless cards), ;nonsec, , , , , , , , ,	CON	CON	CON	CON	CON	CON
The OPEN shall support Application selection on the Basic Logical Channel via Explicit Selection through the SELECT [by name] command.;nonsec, , , , , , , , , ,	AVA	AVA	INT	AVA	AVA	AVA
The OPEN may also support additional selection processes.;nonsec, , , , , , , , , ,	CON	CON	CON	CON	CON	CON
Partial AID selection as defined in section 6.4.2.1.2 - Explicit Selection, shall be supported. (Partial AID selection does not require knowledge of the full AID by the off-card entity.);nonsec, , , , , , , , ,	CON	CON	CON	CON	CON	CON
As multiple Applications on the card may have the same partial AID, it is required that a method exists to select all Applications matching the partial AID.;nonsec, , , , , , , , ,	CON	CON	CON	CON	CON	CON
Once the card session has been established (for contact cards according to ISO/IEC 7816-4 after Answer-to-Reset, or after the activation sequence for contactless cards according to ISO/IEC 14443-3), and before the first command is issued to the card, the Application defined as implicitly selectable on the Basic Logical Channel and for that card I/O interface shall become the selected Application …	CON	CON	CON	CON	CON	CON
If the card is in the Life Cycle State CARD_LOCKED or TERMINATED, the Application with the Final Application privilege is the selected Application on the Basic Logical Channel and the OPEN shall not attempt to identify the implicitly selectable Application;nonsec, , , , , , , , ,	CON	CON	AVA	CON	CON	CON
In all other cases the OPEN shall search the GlobalPlatform Registry for an Application that is marked as implicitly selectable on the Basic Logical Channel for the current card I/O interface (e.g. contact or contactless), and if this Application is not in the Life Cycle State LOCKED, it shall become the selected Application on the Basic Logical Channel. If this is an Application in the Life Cycl…	INT	INT	INT	INT	CON	INT
At any time during a Card Session the OPEN may receive a request to select an Application on the Basic Logical Channel (SELECT [by name] [first or only occurrence] command). The OPEN shall determine if the requested AID matches or partially matches an entry within the GlobalPlatform Registry and whether this entry is selectable.;nonsec, , , , , , , , , ,	INT	CON	INT	INT	AVA	INT
At any time during a Card Session that has already contained a SELECT [by name] [first or only occurrence] command, the OPEN may receive a request to select a next Application (SELECT [by name] [next occurrence] command) on the Basic Logical Channel. The OPEN shall determine if the requested AID matches or partially matches another entry within the GlobalPlatform Registry and whether this entry i…	AVA	AVA	INT	AVA	AVA	AVA
"For both the SELECT [by name] [first or only occurrence] command and the SELECT [by name] [next occurrence] command, an Application becomes the selected Application on the Basic Logical Channel if: The requested AID matches (fully or partially) the Applicationís AID, The Application being selected is in the correct Life Cycle State, The Application has no restrictions due to multi-selection, and…	CON	CON	CON	CON	CON	CON
"In the card Life Cycle State CARD_LOCKED: - If the Application being selected has the Final Application privilege, this Application is re-selected and a warning is returned to the off-card entity, - If any other Application is being selected, the Application with the Final Application privilege remains selected and an error is returned to the off- card entity,";nonsec, , , , , , , , , ,	CON	CON	CON	CON	CON	CON
"If a SELECT [by name] [first or only occurrence] or SELECT [by name] [next occurrence] is received and the data field of the command message is not present, the Issuer Security Domain shall become the currently selected Application and the SELECT command is dispatched to the Issuer Security Domain,";nonsec, , , , , , , , , ,	AVA	AVA	AVA	AVA	AVA	AVA
If a SELECT [by name] [first or only occurrence] is received, the search always begins from the start of the GlobalPlatform Registry, ;nonsec, , , , , , , ,	AVA	CON	CON	AVA	AVA	AVA
If a SELECT [by name] [next occurrence] is received, the search always begins from the entry following the currently selected Application on the Basic Logical Channel in the GlobalPlatform Registry, ;nonsec, , , , , , , ,	CON	CON	CON	CON	CON	CON
If a full or partial match is found and this Application is in the Life Cycle State INSTALLED, continue searching through the GlobalPlatform Registry for a subsequent full or partial match. If no subsequent full or partial match is found, the OPEN shall return the appropriate error to the off-card entity, ;nonsec, , , , , , ,	CON	CON	CON	CON	CON	CON
If a full or partial match is found and this Application is in the Life Cycle State LOCKED, continue searching through the GlobalPlatform Registry for a subsequent full or partial match. In the eventuality that this locked Application is already currently selected on the Basic Logical Channel, the OPEN shall terminate this Application Session. If no subsequent full or partial match is found, the …	CON	CON	CON	CON	CON	CON
If a full or partial match is found and this Application cannot be selected due to a multi-selection restriction or because the Application refuses selection (e.g. because it does not support the current card interface), continue searching through the GlobalPlatform Registry for a subsequent full or partial match. If no subsequent full or partial match is found, the OPEN shall return the appropri…	AVA	CON	CON	CON	AVA	CON
If a full or partial match is found and this Application is selectable (i.e. in the correct Life Cycle State and has no multi-selection restrictions), then it shall become the currently selected Application on the Basic Logical Channel and the SELECT [by name] command, whether [first or only occurrence] or [next occurrence], shall be processed according to the requirements of the runtime environm…	CON	AVA	INT	INT	INT	INT
"If no full or partial match is found at all, the currently selected Application on the Basic Logical Channel shall remain the selected Application and - If the SELECT [by name] command has the [first or only occurrence] parameter set, the SELECT command is dispatched to the Application, - If the SELECT [by name] command has the [next occurrence] parameter set, the OPEN shall return the appropria…	CON	CON	CON	CON	CON	CON
In the eventuality that the current Application Session has been terminated and no subsequent full or partial match is found, the OPEN shall make an attempt to select the Application that is marked as implicitly selectable on the Basic Logical Channel for the current card interface.;nonsec, , , , , , , , ,	CON	CON	CON	CON	CON	CON
At any time during a Card Session the OPEN may receive a request on the Basic Logical Channel to either open or close a Supplementary Logical Channel.;nonsec, , , , , , , , , ,	CON	INT	INT	CON	CON	CON
If the card only supports the Basic Logical Channel and has no concept of logical channel support, the MANAGE CHANNEL command is dispatched to the currently selected Application. In this case, when a Security Domain is the currently selected Application, the command shall be rejected.;nonsec, , , , , , ,	CON	CON	CON	CON	CON	CON
"On cards that support logical channels, if a MANAGE CHANNEL [open] is received: If an Application is designated as implicitly selectable on the new Supplementary Logical Channel for the current card interface, that Application is implicitly selected on the newly opened Supplementary Logical Channel and runtime behavior requirements apply, Otherwise the Application designated as implicitly select…	CON	CON	CON	CON	CON	CON
On cards that support logical channels, if a MANAGE CHANNEL [close] is received, terminate the Application Session currently selected on the Supplementary Logical Channel indicated by the command and then close that logical channel. The Basic Logical Channel can never be closed.;nonsec, , , , , , , ,	AVA	AVA	CON	CON	AVA	AVA
If the card is in the Life Cycle State CARD_LOCKED or TERMINATED, return the appropriate error.;nonsec, , , , , , , , ,	CON	CON	CON	CON	CON	CON
If the number of logical channels supported by the OPEN is not sufficient to open a new Supplementary Logical Channel, return the appropriate error.;nonsec, , , , , , , , ,	CON	CON	CON	CON	CON	CON
"The OPEN shall search the GlobalPlatform Registry for the Application that supports the current card interface and that is marked as implicitly selectable on the new Supplementary Logical Channel (or failing that, on the Basic Logical Channel) and: - If this is an Application in the Life Cycle State LOCKED, the Application with the Final Application privilege shall become the selected Applicatio…	CON	CON	CON	CON	CON	CON
Once an Application becomes the selected Application on the Basic Logical Channel, the responsibility for subsequent command dispatching still rests with the OPEN.;nonsec, , , , , , , , ,	CON	CON	CON	CON	CON	CON
On cards that are aware of logical channels, the MANAGE CHANNEL commands are only processed by the OPEN and are not dispatched to an Application.;nonsec, , , , , , , , ,	CON	AVA	INT	INT	INT	INT
All other commands (including the MANAGE CHANNEL commands on cards that are not aware of logical channels or SELECT commands not described in section 6.4.2.1.2 - Explicit Selection) are immediately dispatched to the Application currently selected on the Basic Logical Channel. The processing of the command by the Application is beyond the scope of this Specification.;nonsec, , , , , , , , , ,	CON	CON	CON	CON	CON	CON
"The OPEN shall support Application selection on an available Supplementary Logical Channel via two processes: Implicit Selection following a successful MANAGE CHANNEL [open] command, Explicit Selection through the SELECT [by name] command.";nonsec, , , , , , , , , ,	INT	AVA	INT	INT	INT	INT
The OPEN may also support additional selection processes.;nonsec, , , , , , , , , ,	CON	CON	CON	CON	CON	CON
Partial AID selection as defined in section 6.4.3.1.2 - Explicit Selection, shall be supported on Supplementary Logical Channels.;nonsec, , , , , , , , ,	CON	CON	CON	CON	CON	CON
At any time on an open Supplementary Logical Channel, the OPEN may receive a request to select an Application on this Supplementary Logical Channel (SELECT [by name] [first or only occurrence] command). The OPEN shall determine if the requested AID matches or partially matches an entry within the GlobalPlatform Registry and whether this entry is selectable.;nonsec, , , , , , , , ,	CON	AVA	INT	INT	CON	Conflict
At any time on an open Supplementary Logical Channel that has already contained a SELECT [by name] [first or only occurrence] command since the Supplementary Logical Channel was last opened, the OPEN may receive a request to select a next Application (SELECT [by name] [next occurrence] command) on this Supplementary Logical Channel. The OPEN shall determine if the requested AID matches or partial…	INT	INT	INT	INT	INT	INT
"For both the SELECT [by name] [first or only occurrence] command and the SELECT [by name] [next occurrence] command, an Application becomes the selected Application on the Supplementary Logical Channel if: The requested AID matches (fully or partially) the Applicationís AID, The Application being selected is in the correct Life Cycle State, The Application has no restrictions due to multi-select…	INT	CON	INT	INT	INT	INT
"If the card is in the Life Cycle State CARD_LOCKED or TERMINATED: - Close the Supplementary Logical Channel, if currently open, - Return the appropriate error,";nonsec, , , , , , , , , ,	CON	CON	CON	CON	CON	CON
If a SELECT [by name] [first or only occurrence] or SELECT [by name] [next occurrence] is received and the data field of the command message is not present, the Issuer Security Domain shall become the currently selected Application and the SELECT command is dispatched to the Issuer Security Domain, ;nonsec, , , , , , , ,	CON	AVA	CON	CON	CON	CON
If a SELECT [by name] [first or only occurrence] is received, the search always begins from the start of the GlobalPlatform Registry, ;nonsec, , , , , , , ,	CON	CON	CON	CON	INT	CON
If a SELECT [by name] [next occurrence] is received, the search always begins from the entry following the currently selected Application on this Supplementary Logical Channel in the GlobalPlatform Registry, ;nonsec, , , , , , , ,	CON	AVA	INT	INT	CON	Conflict
If a full or partial match is found and this Application is in the Life Cycle State INSTALLED, continue searching through the GlobalPlatform Registry for a subsequent full or partial match. If no subsequent full or partial match is found, the OPEN shall return the appropriate error to the off-card entity, ;nonsec, , , , , , ,	INT	INT	INT	INT	AVA	INT
If a full or partial match is found and this Application is in the Life Cycle State LOCKED, continue searching through the GlobalPlatform Registry for a subsequent full or partial match. In the eventuality that this locked Application is already currently selected on the same Supplementary Logical Channel, the OPEN shall terminate this Application Session. If no subsequent full or partial match i…	CON	CON	CON	CON	CON	CON
"If a full or partial match is found and this Application cannot be selected due to a multi-selection restriction or because the Application refuses selection (e.g. because it does not support the current card interface), continue searching through the GlobalPlatform Registry for a subsequent full or partial match. If no subsequent full or partial match is found, the OPEN shall return the appropr…	CON	CON	CON	CON	CON	CON
If a full or partial match is found and this Application is selectable (i.e. in the correct Life Cycle State and has no multi-selection restrictions), then it shall become the currently selected Application on this Supplementary Logical Channel and the SELECT [by name] command, whether [first or only occurrence] or [next occurrence], shall be processed according to the requirements of the runtime…	CON	CON	INT	INT	INT	INT
"If no full or partial match is found at all, the currently selected Application on the Supplementary Logical Channel shall remain the selected Application and - If the SELECT [by name] command has the [first or only occurrence] parameter set, the SELECT command is dispatched to the Application, - If the SELECT [by name] command has the [next occurrence] parameter set, the OPEN shall return the a…	CON	CON	INT	CON	INT	CON
"At any time on an open Supplementary Logical Channel the OPEN may receive a request to either open or close a Supplementary Logical Channel. If a MANAGE CHANNEL [open] is received and the Application selected on the original Supplementary Logical Channel has no multi-selection restrictions, this Application becomes the selected Application on the newly opened Supplementary Logical Channel. If a …	CON	CON	INT	CON	INT	CON
If the card is in the Life Cycle State CARD_LOCKED or TERMINATED, return the appropriate error, ;nonsec, , , , , , , ,	CON	CON	CON	CON	CON	CON
If the number of logical channels supported by the OPEN is not sufficient to open a new Supplementary Logical Channel, return the appropriate error, ;nonsec, , , , , , , ,	AVA	AVA	AVA	AVA	AVA	AVA
If the Application currently selected on the original Supplementary Logical Channel cannot be selected on the new Supplementary Logical Channel due to a multi-selection restriction, the new logical channel shall not be opened and the OPEN shall return the appropriate error, ;nonsec, , , , , , , ,	CON	CON	CON	CON	CON	CON
Otherwise, the Supplementary Logical Channel indicated by the command is opened and the Application currently selected on the original Supplementary Logical Channel shall become the selected Application on the newly opened Supplementary Logical Channel.;nonsec, , , , , , , , ,	CON	CON	CON	CON	CON	CON
Once an Application becomes the selected Application on a Supplementary Logical Channel, the responsibility for subsequent command dispatching still rests with the OPEN.;nonsec, , , , , , , , ,	CON	CON	CON	CON	CON	CON
The MANAGE CHANNEL commands are only processed by the OPEN and are not dispatched to an Application.;nonsec, , , , , , , , , ,	CON	CON	CON	CON	CON	CON
All other commands (including SELECT commands not described in section 6.4.3.1.2 - Explicit Selection) are immediately dispatched to the Application currently selected on the Supplementary Logical Channel. The processing of the command by the Application is beyond the scope of this Specification.;nonsec, , , , , , , , , ,	CON	CON	CON	CON	CON	CON
"The GlobalPlatform Registry is used to: Store card management information, Store relevant application management information (e.g., AID, associated Security Domain and Privileges), Support card resource management data, Store Application Life Cycle information, Store card Life Cycle information, Track any counters associated with logs.";nonsec, , , , , , , , , ,	CON	CON	CON	CON	CON	CON
"The contents of the GlobalPlatform Registry may be updated in response to: An internal OPEN invoked action, An authorized Application invoked action.";nonsec, , , , , , , , , ,	CON	CON	CON	CON	CON	CON
All Applications including all Security Domains, and all Executable Load Files, shall have an entry in the GlobalPlatform Registry.;nonsec, , , , , , , ,	CON	CON	CON	CON	CON	CON
Each Executable Load File or Executable Module is associated with an AID that shall be unique on the card.;nonsec, , , , , , , , , ,	CON	CON	CON	CON	CON	CON
An Application AID may be the same as that of an Executable Module but may not be the same as that of an Executable Load File or the same as another Application already present in the GlobalPlatform Registry.;nonsec, , , , , , , , , ,	CON	CON	CON	CON	CON	CON
This AID may be specified in a SELECT command to select the Application. It is not possible to select Executable Load Files or Executable Modules.;nonsec, , , , , , , , , ,	INT	CON	CON	CON	INT	CON
;, , , , , , , , , ,	INT	AVA	CON	CON	CON	CON
Internally to the CPN	CON	CON	CON	CON	CON	CON
The CNG shall detect the end of the life of the key used for cryptographic protection of the wireless communication between the CND and the CNG.;sec	CON	CON	CON	CON	CON	CON
A CPN-user attempting to invoke a CNG-mediated service shall be identified and authenticated by the CNG before being granted access to the service.;sec	CON	CON	CON	CON	CON	CON
The CNG shall implement an authentication failure handling policy.;sec	CON	CON	CON	CON	CON	CON
The CNG shall take action according to local authentication failure handling policy (which may include silently discarding the authentication and explicit failure notification	CON	CON	CON	CON	CON	CON
The CNG should detect replayed user and/or device credentials.;sec	CON	AVA	INT	CON	CON	CON
When the CNG detects replayed user and/or device credentials	CON	CON	CON	CON	CON	CON
The CNG shall implement a privacy protection policy specifying as a minimum private and critical information.;sec	CON	CON	CON	CON	CON	CON
When the CNG detects violation of the privacy protection policy the CNG shall discard all signalling	CON	CON	CON	CON	CON	CON
The CNG shall implement an authorization management handling policy.;sec	CON	CON	CON	CON	CON	CON
On reception at the CNG of a message to access configuration information for update and detection of authorization failure the CNG shall reject the request and manage the failure in accordance with the CPN authorization management handling policy.;sec	CON	CON	CON	CON	CON	CON
Where a CND invokes a session at the CNG the CNG shall record the association of session-id	CON	CON	CON	CON	CON	CON
On transmission of management information from the CNG to a CND the CNG shall append a timestamp or sequence number to the outgoing message.;sec	CON	CON	CON	CON	CON	CON
On reception at the CNG of a message containing management information the CNG shall extract the timestamp or sequence number and verify that the message has not been replayed.;sec	CON	CON	CON	CON	CON	CON
On reception at the CNG of a message to access or update configuration information the CNG shall allow access only if the sender is an administrator.;sec	CON	CON	CON	CON	CON	CON
On detection of a message integrity error at the CNG the CNG shall discard the message.;sec	CON	CON	CON	CON	CON	CON
On indication received at the CNG of a resource allocation expiry the CNG shall delete all residual data associated with the invocation of the resource.;sec	CON	CON	CON	CON	CON	CON
On receipt of a valid (i.e. authorized) request for data stored in the CNG the CNG shall return the requested data to the requesting user.;sec	CON	CON	CON	CON	CON	CON
On receipt of a valid (i.e. authorized) request for access to a CNG hosted service or application the CNG shall provide the requested service or application to the requesting user.;sec	CON	CON	INT	CON	INT	CON
On detection of any system failure or discontinuity not specifically handled by other mechanisms the CNG shall revert to a known safe state.;sec	INT	AVA	AVA	INT	INT	INT
The CNG shall support mechanisms to authenticate itself to the NGN for connectivity purposes.;sec	CON	CON	CON	CON	CON	CON
The CNG shall support mechanisms to authenticate itself to the NGN for service usage purposes.;sec	CON	CON	INT	CON	CON	CON
The CNG shall support mechanisms to authenticate CNDs to the NGN for service usage purposes if they are not able to fully support the related procedures in an autonomous way.;sec	CON	INT	CON	CON	CON	CON
The CNG shall support mechanisms for authentication of wireless CNDs for local connectivity. Similar mechanisms may be also implemented for non-wireless devices.;sec	CON	CON	INT	INT	INT	INT
The CNG and CPN shall support mechanisms that prevent access to the network by unauthorized users.;sec	CON	CON	CON	CON	CON	CON
The capacity of the authorized entities should depend on the security policies defined by the service providers	CON	CON	CON	CON	INT	CON
The CNG and the CPN shall implement mechanisms to limit the visibility of the WAN side network and resources to authorized entities.;sec	CON	CON	CON	CON	CON	CON
The diagnostic operations on the CPN by an operator shall be performed in accordance with rules protecting the users' privacy.;sec	CON	CON	CON	CON	CON	CON
CPN environment shall be protected with a stateful firewall function	CON	CON	CON	CON	INT	CON
The CNG and the CPN shall be able to support parental control related functionalities limiting the use of the broadband connection on a user or time basis. Limitations on a content basis may be shared with devoted network servers.;sec	INT	CON	INT	INT	INT	INT
The CNG shall be equipped with a WAN interface towards the NGN	CON	CON	INT	INT	INT	INT
LAN interfaces. The CNG shall be equipped with at least one Ethernet (minimum 100 Mbit/s) is interface. Optional interfaces could be present	CON	CON	INT	CON	CON	CON
The CNG shall support both routed and bridged modes of operation.;nonsec	CON	CON	CON	CON	CON	CON
The CNG shall support direct intra-LAN connectivity between any appropriate pair of devices on the Customer Premises Network.;nonsec	CON	CON	INT	CON	INT	CON
The CNG shall support different IP address schemes and subnets on the same physical LAN port	CON	CON	CON	CON	CON	CON
The CNG and devices shall support mechanisms to identify and share information about the customer network devices (e.g. type of device and basic capabilities	CON	CON	CON	CON	CON	CON
The CNG shall support use of one user identity on several terminals as well as to share one terminal with several identities.;nonsec	INT	INT	INT	INT	INT	INT
The CNG and the Customer Network shall support the NGN services usage (e.g. voice communications	INT	CON	INT	INT	INT	INT
The CNG should support redirection of IP Multimedia sessions	CON	CON	CON	CON	INT	CON
The CNG and the Customer Network shall assure the confidentiality	CON	CON	CON	CON	CON	CON
The CNG and the Customer Network shall provide the opportunity for a customer network administrator to perform service and network-related configuration. According to the service/network provider choices	CON	INT	INT	INT	INT	INT
The CNG should negotiate session parameters (bandwidth	CON	CON	INT	CON	INT	CON
The CPN shall support remote access	CON	AVA	CON	CON	CON	CON
The CNG shall allow the customer remote access to a CND in the Customer Network	CON	CON	INT	CON	INT	CON
Standard NGN authentication	CON	CON	INT	INT	CON	CON
The CNG may use multiple tunnel connections for providing e.g. adequate QoS for the remote access user.;nonsec	CON	CON	CON	CON	CON	CON
The CNG may allow secure dynamic firewall opening for remote access devices based on NGN authentication functions.;nonsec	CON	CON	INT	INT	INT	INT
The CNG may provide Home to Home (H2H) communication service connecting CNDs in different CPNs.;nonsec	INT	AVA	CON	INT	INT	INT
If Home to Home (H2H) communication service is provided	INT	AVA	INT	INT	INT	INT
If Home to Home (H2H) communication service is provided	CON	CON	CON	CON	CON	CON
The CPN may support encrypted communication with remote access devices	CON	CON	INT	CON	CON	CON
The CNG may act as a proxy for handling messages (requests and responses) related to the remote access scenarios to and from the home.;nonsec	CON	CON	CON	CON	CON	CON
The CNG may support mechanisms supporting nomadism of the users and their subscribed services from one physical customer environment to another.;nonsec	INT	INT	INT	INT	INT	INT
The CNG should be able to assist in establishing Rich Communication Suite sessions between CNDs	INT	INT	INT	INT	INT	INT
It should be possible for more than one identity to be associated with a single CPN subscription.;nonsec	CON	CON	CON	CON	CON	CON
It should be possible for a service profile to be associated with each identity within a CPN subscription.;nonsec	INT	INT	INT	INT	INT	INT
It shall be possible for a single public identity to be associated with multiple CNDs where each association is allocated a unique private identity.;nonsec	CON	CON	INT	CON	CON	CON
Multiple public identities on the same terminal shall be supported.;nonsec	CON	CON	INT	CON	INT	CON
The CNG shall support a mechanism allowing the support of call forking towards customer non-IMS capable devices.;nonsec	CON	CON	CON	CON	INT	CON
The CNG shall able to store information related to private identities of non-IMS capable CNDs.;nonsec	CON	CON	CON	CON	CON	CON
The CNG shall support a mechanism allowing the support of call forwarding toward non-IMS capable CNDs.;nonsec	INT	CON	INT	INT	INT	INT
The CNG shall support intra-CPN communication between IMS and non-IMS capable CNDs.;nonsec	CON	CON	INT	CON	CON	CON
The customer environment (CNG and/or CNDs) should support a mechanism to allow service roaming;nonsec	CON	CON	CON	CON	CON	CON
The NGN network should be provided with a CND location information.;nonsec	INT	CON	INT	INT	INT	INT
Codec requirements and capabilities for the User Equipment (including the CNG) are already defined in TS†181 005 [1] which describes service requirements and capabilities for the TISPAN NGN.;nonsec	INT	AVA	INT	AVA	INT	INT
The CNG shall support mechanisms for managing IPTV flows provided both in unicast and multicast mode.;nonsec	INT	CON	INT	INT	INT	INT
In case of multicast flows the CNG shall keep a record of which devices are subscribed to which multicast group.;nonsec	CON	CON	CON	CON	INT	CON
An IPTV media flow shall be terminated by a STB or by a specific device called "media gateway" (or "application gateway"). The CNG shall not terminate any IPTV flow by itself.;nonsec	CON	CON	INT	CON	INT	CON
The CNG shall support the connection to a STB (or media gateway) both in a bridged or in a routed mode of operation.;nonsec	INT	CON	INT	INT	INT	INT
Depending on the operation mode chosen (bridged or touted) and on the type of flow treated (unicast or multicast) the CNG shall forward packets only to the physical interfaces which are connected to devices interested to the IPTV flow.;nonsec	CON	CON	INT	INT	INT	INT
In case of multicast streams the CNG should support proxy functionalities to optimize the management of information related to signalling.;nonsec	CON	CON	CON	CON	CON	CON
CNG shall perform a link layer multicast to unicast translation if the STB or media gateway are connected using customer network technologies not supporting multicast flows (e.g. powerlines	CON	CON	CON	CON	INT	CON
STB or media gateways should be equipped with a programmable open API allowing the implementation of specific service logics.;nonsec	CON	CON	CON	INT	CON	CON
Functionalities related to Electronic Programming Guide and DRM management shall be implemented in STB or media gateway and not in CNG.;nonsec	CON	CON	CON	CON	CON	CON
Media flows (data plane) transcoding shall be performed by STB or media gateway and not by the CNG.;nonsec	CON	CON	INT	INT	INT	INT
Protocols adaptation for control plane or management plane may be performed by CNG.;nonsec	INT	CON	INT	INT	INT	INT
Presence related information shall be sent to the NGN by the STB or the CNG (depending on the specific architectural choices	CON	CON	CON	CON	CON	CON
CPN should support user generated content (UGC) using an NGN service.;nonsec	CON	CON	CON	CON	CON	CON
CPN should support storage of UGC within the CPN.;nonsec	CON	CON	CON	CON	CON	CON
Subject to applicable regulation	CON	INT	CON	CON	CON	CON
CPN should support bookmarks (e.g. hyperlinks) to stored and streaming user-generated content in order to store and exchange references to uploaded and streaming UGC	CON	CON	CON	CON	CON	CON
The user should be able to personalize bookmarks to UGC.;nonsec	CON	CON	CON	CON	CON	CON
CPN should support inter-destination content synchronisation of streaming multimedia content. This should achieve that all or a specific group of users consuming specific content get the content presented simultaneously	CON	AVA	CON	CON	CON	CON
The CNG and the CPN shall support adequate Quality of Service mechanisms (e.g. prioritize the traffic in the event that there is not sufficient bandwidth in the customer network in order to ensure the correct network performances to each traffic flow). To achieve this objective a number of functionalities shall be supported by CNG and/or CNDs	AVA	AVA	AVA	AVA	AVA	AVA
The NGN network QoS functions shall be possible to use to enhance the end-user experience.;nonsec	CON	AVA	CON	AVA	AVA	AVA
The CNG may interact with the Resource and Admission Control Subsystem (RACS) as defined in ES 282 001 [9] to support remote real-time QoS control;nonsec	CON	CON	CON	AVA	AVA	CON
The CNG may interact with network elements inside the CPN to support QoS control inside the CPN.;nonsec	CON	CON	CON	CON	INT	CON
The CNG shall classify packets entering the CPN through its WAN interface (downstream direction) according to a number of predefined priorities. Classification can be done on the basis of different layer 2 and/or layer 3 parameters.;nonsec	CON	AVA	INT	CON	CON	CON
The number of possible values defining the packet priority and	CON	CON	CON	CON	INT	CON
When forwarding packets from the WAN interface to the customer network	CON	CON	CON	CON	INT	CON
The CNG shall classify packets coming from the CPN through its LAN interfaces (upstream direction) according to a number of predefined priorities. Classification can be done on the basis of different layer 2 and/or layer 3 parameters.;nonsec	CON	CON	CON	CON	CON	CON
The number of possible values defining the packet priority and	CON	CON	CON	CON	CON	CON
When forwarding packets from the customer network to the WAN interface	CON	AVA	CON	CON	CON	CON
The CNG shall be able to classify intra-LAN traffic that is simply bridged by the CNG itself within the CPN.;nonsec	CON	CON	CON	AVA	CON	CON
Traffic marking: depending on what are the parameters used to perform classification	CON	CON	CON	CON	CON	CON
In case of huge amount of traffic in upstream or downstream directions	CON	CON	CON	CON	CON	CON
In case of managed services	CON	CON	CON	CON	CON	CON
In case of unmanaged services	CON	CON	CON	CON	CON	CON
CNG shall be equipped with an application client to be remotely manageable by the service providers for configuration	CON	CON	CON	CON	CON	CON
It shall be possible to configure the CNG (e.g. firmware downloading) according to the subscribed services. This operation may be performed when the CNG is connected to the network for the first time	CON	CON	CON	CON	CON	CON
CNG shall support mechanisms for secure authentication and communication with the remote management system.;nonsec	CON	CON	CON	CON	CON	CON
The CNG shall be associated with a unique Hardware ID to be used for identification NGN side.;nonsec	CON	CON	CON	CON	CON	CON
A suitably authorized CPN user (e.g. the system administrator) shall be able to install and activate NGN managed services without the intervention of the subscribing CPN user.;nonsec	CON	CON	CON	CON	CON	CON
A suitably authorized CPN user (e.g. the system administrator) shall be able to manage and configure the provisioning	CON	CON	CON	CON	CON	CON
A CPN user shall be able to configure any unmanaged service provided to the user.;nonsec	CON	CON	CON	CON	CON	CON
The CNG Remote Management requires to manage a specific set of parameters. At least the following list of parameters shall be available: Customer Identification	CON	CON	CON	CON	CON	CON
For the CNG management it is recommended to use a single protocol	CON	CON	CON	CON	CON	CON
CNDs connected to the CPN and devoted to specific NGN managed services shall be remotely manageable.;nonsec	CON	CON	CON	CON	CON	CON
CNG shall support mechanisms allowing the CNDs remote management when applicable.;nonsec	CON	CON	CON	CON	CON	CON
Protection mechanisms shall be implemented to avoid that a management client could access and modify parameters that is not allow to configure.;nonsec	CON	CON	CON	CON	CON	CON
The CPN (trough CNDs and/or CNG) shall support manual configuration to insert information to access IMS network (e.g. IMPU	INT	INT	INT	INT	INT	INT
The CND directly or through the CNG must be able to access to Network Configuration Service Function without involving any user interaction. ;nonsec	CON	CON	CON	CON	CON	CON
The Network Configuration Server should be able to upload different parameter sets related to service subscription.;nonsec	CON	AVA	CON	CON	CON	CON
The CND should be able to support bootstrap capabilities in order to retrieve network configuration data to connect the NGN.;nonsec	INT	INT	INT	INT	INT	INT
The CND/CNG shall support a mechanism allowing the user to manually modify the association between a public identity (e.g. phone number) and a specific private identity corresponding to a single customer device not provided with a UICC and corresponding also to legal service level agreements between the user and the service provider.;nonsec	CON	INT	CON	CON	CON	CON
The CPN (CND and/or CNG) shall support a method to access a Self Configuration Server.;nonsec	CON	INT	CON	CON	AVA	CON
The CPN should support a capability to ensure QoS and call prioritization for sessions originating or terminating in the H(e)NB.;nonsec	CON	CON	CON	CON	AVA	CON
A CND	CON	CON	CON	CON	CON	CON
Authorized users shall be able to access NGN-based services using any NGN supported home device.;nonsec	AVA	AVA	INT	AVA	AVA	AVA
Both IMS capable devices with or without UICC and non-IMS capable devices without UICC shall be supported.;nonsec	CON	CON	CON	CON	CON	CON
If the CND contains an ISIM/UICC	CON	CON	CON	CON	CON	CON
If the CND does not contain an ISIM/UICC	CON	CON	CON	CON	CON	CON
The CND shall provide its registration identity	CON	CON	CON	CON	CON	CON
In order to support the NGN services and intra-CPN communications	CON	CON	AVA	CON	CON	CON
The CND should support protocols for remote access management.;nonsec	INT	INT	INT	INT	CON	INT
The CND should support protocol for local authentication in CPN/CNG.;nonsec	INT	CON	INT	INT	AVA	INT
The CND shall support the NGN services usage (e.g. voice communications	AVA	AVA	INT	AVA	AVA	AVA
The CND shall support protocol to access the NGN service layer platforms.;nonsec	CON	CON	CON	CON	CON	CON
The CND shall support protocols to access Self Configuration application (as defined in clause 4.1).;nonsec	CON	CON	CON	CON	CON	CON
The CND shall be able to download and install client application services.;nonsec	AVA	AVA	AVA	AVA	AVA	AVA
The CND should be able to communicate its services related capabilities to the CNG.;nonsec	AVA	CON	CON	AVA	AVA	AVA
The CND should be able to support one or more codecs for communication services (as defined by TS†181 005 [1]).;nonsec	CON	CON	CON	CON	CON	CON
The CNG shall support mechanisms to authenticate itself to the NGN for connectivity purposes.;sec	CON	CON	CON	CON	CON	CON
The CNG shall support mechanisms to authenticate itself to the NGN for service usage purposes.;sec	CON	CON	CON	CON	CON	CON
The CNG shall support mechanisms to authenticate CNDs to the NGN for service usage purposes if they are not able to fully support the related procedures in an autonomous way.;sec	AVA	CON	CON	CON	AVA	CON
The CNG shall support mechanisms for authentication of wireless CNDs for local connectivity. Similar mechanisms may be also implemented for non-wireless devices.;sec	CON	AVA	INT	INT	INT	INT
The CNG and CPN shall support mechanisms that prevent access to the network by unauthorized users.;sec	CON	CON	CON	CON	CON	CON
The capacity of the authorized entities should depend on the security policies defined by the service providers	CON	CON	CON	CON	CON	CON
The CNG and the CPN shall implement mechanisms to limit the visibility of the WAN side network and resources to authorized entities.;sec	CON	INT	INT	CON	CON	CON
The diagnostic operations on the CPN by an operator shall be performed in accordance with rules protecting the users' privacy.;sec	CON	CON	CON	CON	CON	CON
CPN environment shall be protected with a stateful firewall function	CON	CON	CON	CON	CON	CON
The CNG and the CPN shall be able to support parental control related functionalities limiting the use of the broadband connection on a user or time basis. Limitations on a content basis may be shared with devoted network servers.;sec	AVA	AVA	CON	CON	AVA	AVA
The CNG shall be equipped with a WAN interface towards the NGN	CON	CON	CON	CON	CON	CON
LAN interfaces. The CNG shall be equipped with at least one Ethernet (minimum 100 Mbit/s) is interface. Optional interfaces could be present	CON	CON	CON	CON	CON	CON
The CNG shall support both routed and bridged modes of operation.;nonsec	CON	CON	CON	CON	CON	CON
The CNG shall support direct intra-LAN connectivity between any appropriate pair of devices on the Customer Premises Network.;nonsec	CON	CON	CON	CON	CON	CON
The CNG shall support different IP address schemes and subnets on the same physical LAN port	CON	AVA	INT	INT	INT	INT
The CNG and devices shall support mechanisms to identify and share information about the customer network devices (e.g. type of device and basic capabilities	CON	CON	CON	CON	CON	CON
The CNG shall support use of one user identity on several terminals as well as to share one terminal with several identities.;nonsec	INT	AVA	INT	INT	INT	INT
The CNG and the Customer Network shall support the NGN services usage (e.g. voice communications	CON	CON	CON	CON	CON	CON
The CNG should support or not prevent redirection of IP Multimedia sessions	CON	CON	CON	CON	CON	CON
The CNG and the Customer Network shall assure the confidentiality	CON	AVA	INT	INT	CON	Conflict
The CNG and the Customer Network shall provide the opportunity for a customer network administrator to perform service and network-related configuration. According to the service/network provider choices	INT	INT	INT	INT	INT	INT
The CNG should negotiate session parameters (bandwidth	INT	CON	INT	INT	INT	INT
The CPN shall support secure remote access control	CON	CON	CON	CON	CON	CON
The CNG shall allow the customer remote access to a CND in the Customer Network	CON	AVA	CON	CON	CON	CON
Standard NGN authentication	CON	CON	CON	CON	INT	CON
The CNG may allow secure dynamic firewall opening for remote access devices based on NGN authentication functions.;nonsec	CON	AVA	INT	INT	CON	Conflict
The CPN may support encrypted communication with remote access devices	INT	INT	INT	INT	AVA	INT
The CNG may act as a proxy for handling messages (requests and responses) related to the remote access scenarios to and from the home.;nonsec	CON	CON	CON	CON	CON	CON
The CNG may support mechanisms supporting nomadism of the users and their subscribed services from one physical customer environment to another.;nonsec	CON	CON	CON	CON	CON	CON
Multiple identities should be supported within the same subscription. Personal service profiles per each identity within the same subscription should be supported. A shared public identity on several terminals	CON	CON	INT	INT	INT	INT
Multiple public identities on the same terminal shall be supported.;nonsec	CON	CON	INT	CON	INT	CON
The CNG shall support a mechanism allowing the support of call forking towards customer non-IMS capable devices and shall able to store information related to private identities of non-IMS capable CNDs.;nonsec	CON	CON	INT	CON	INT	CON
The CNG shall support a mechanism allowing the support of call forwarding toward non-IMS capable CNDs.;nonsec	CON	CON	CON	CON	CON	CON
The CNG shall support intra-CPN communication between IMS and non-IMS capable CNDs.;nonsec	AVA	AVA	AVA	AVA	AVA	AVA
The customer environment (CNG and/or CNDs) should support a mechanism to allow service roaming;nonsec	CON	CON	CON	CON	CON	CON
(i.e. using the same CND in two different CPNs declaring the same public identity). Supporting this scenario for non IMS capable CNDs is still to be discussed.;nonsec	CON	CON	CON	CON	CON	CON
The NGN network should be provided with a CND location information.;nonsec	CON	CON	CON	CON	CON	CON
Codec requirements and capabilities for the User Equipment (including the CNG) are already defined in TS†181 005 [1] which describes service requirements and capabilities for the TISPAN NGN.;nonsec	CON	CON	CON	CON	CON	CON
The CNG shall support mechanisms for managing IPTV flows provided both in unicast and multicast mode.;nonsec	CON	CON	CON	CON	CON	CON
In case of multicast flows the CNG shall keep a record of which devices are subscribed to which multicast group.;nonsec	CON	CON	CON	CON	CON	CON
An IPTV media flow shall be terminated by a STB or by a specific device called "media gateway" (or "application gateway"). The CNG shall not terminate any IPTV flow by itself.;nonsec	CON	CON	CON	CON	CON	CON
The CNG shall support the connection to a STB (or media gateway) both in a bridged or in a routed mode of operation.;nonsec	CON	CON	CON	CON	CON	CON
Depending on the operation mode chosen (bridged or touted) and on the type of flow treated (unicast or multicast) the CNG shall forward packets only to the physical interfaces which are connected to devices interested to the IPTV flow.;nonsec	CON	CON	CON	CON	CON	CON
In case of multicast streams the CNG should support proxy functionalities to optimize the management of information related to signalling.;nonsec	CON	CON	CON	CON	CON	CON
CNG shall perform a link layer multicast to unicast translation if the STB or media gateway are connected using customer network technologies not supporting multicast flows (e.g. powerlines	INT	CON	CON	CON	INT	CON
STB or media gateways should be equipped with a programmable open API allowing the implementation of specific service logics.;nonsec	INT	AVA	CON	CON	CON	CON
Functionalities related to Electronic Programming Guide and DRM management shall be implemented in STB or media gateway and not in CNG.;nonsec	AVA	AVA	CON	CON	AVA	AVA
Media flows (data plane) transcoding shall be performed by STB or media gateway and not by the CNG.;nonsec	CON	CON	CON	CON	INT	CON
Protocols adaptation for control plane or management plane may be performed by CNG.;nonsec	INT	CON	CON	INT	INT	INT
Presence related information shall be sent to the NGN by the STB or the CNG (depending on the specific architectural choices	INT	CON	INT	AVA	INT	INT
The CNG shall classify packets entering the CPN through its WAN interface (downstream direction) according to a number of predefined priorities. Classification can be done on the basis of different layer 2 and/or layer 3 parameters.;nonsec	INT	CON	INT	CON	INT	INT
The number of possible values defining the packet priority and	CON	CON	CON	CON	CON	CON
When forwarding packets from the WAN interface to the customer network	CON	CON	CON	CON	CON	CON
The CNG shall classify packets coming from the CPN through its LAN interfaces (upstream direction) according to a number of predefined priorities. Classification can be done on the basis of different layer 2 and/or layer 3 parameters.;nonsec	CON	CON	CON	CON	CON	CON
The number of possible values defining the packet priority and	CON	CON	CON	CON	CON	CON
When forwarding packets from the customer network to the WAN interface	CON	CON	CON	CON	CON	CON
CNG shall be able to classify intra-LAN traffic that is simply bridged by the CNG itself within the CPN.;nonsec	CON	CON	CON	CON	CON	CON
Traffic marking: depending on what are the parameters used to perform classification	CON	CON	CON	CON	CON	CON
In case of huge amount of traffic in upstream or downstream directions	CON	CON	CON	CON	CON	CON
In case of managed services	INT	INT	INT	INT	INT	INT
In case of unmanaged services	INT	INT	INT	CON	INT	INT
The CNG shall be equipped with an application client to be remotely manageable by the service providers for configuration	CON	INT	INT	CON	INT	INT
It shall be possible to configure the CNG (e.g. firmware downloading) according to the subscribed services. This operation may be performed when the CNG is connected to the network for the first time	CON	CON	CON	CON	CON	CON
The CNG shall support mechanisms for secure authentication and communication with the remote management system.;nonsec	CON	CON	CON	CON	CON	CON
The CNG shall be associated with a unique Hardware ID to be used for identification NGN side.;nonsec	CON	CON	CON	CON	CON	CON
In case of managed services	CON	CON	CON	CON	CON	CON
The CNG Remote Management requires to manage a specific set of parameters. At least the following list of parameters shall be available: Customer Identification	CON	CON	INT	CON	CON	CON
For the CNG management it is recommended to use a single protocol	CON	AVA	CON	CON	INT	CON
CNDs connected to the CPN and devoted to specific managed services shall be remotely manageable;nonsec	CON	CON	CON	CON	CON	CON
(e.g. VoIP phones	CON	CON	CON	CON	CON	CON
CNG shall support mechanisms allowing the CNDs remote management when applicable.;nonsec	CON	CON	CON	CON	CON	CON
Protection mechanisms shall be implemented to avoid that a management client could access and modify parameters that is not allow to configure.;nonsec	AVA	AVA	AVA	AVA	AVA	AVA
The CPN (trough CNDs and/or CNG) shall support manual configuration to insert information to access IMS network (e.g. IMPU	AVA	AVA	CON	CON	AVA	AVA
The CND directly or through the CNG must be able to access to Network Configuration Service Function avoiding any user interaction. (and so the Network Configuration Server should be able to upload different parameter related to service subscription).;nonsec	CON	CON	CON	CON	CON	CON
The CND should be able to support bootstrap capabilities in order to retrieve network configuration data to connect the NGN.;nonsec	CON	AVA	CON	INT	INT	Conflict
The CND/CNG shall support a mechanism allowing the user to manually modify the association between a public identity (e.g. phone number) and a specific private identity corresponding to a single customer device not provided with a UICC.;nonsec	AVA	AVA	INT	INT	AVA	AVA
The CPN (CND and/or CNG) shall support a method to access a Self Configuration Server.;nonsec	CON	CON	CON	CON	CON	CON
