# Supplementary material for: Classifying software security requirements into confidentiality, integrity, and availability using machine learning approaches
Source: PeerJ Comput Sci. 2024 Nov 26;10:e2554. doi: 10.7717/peerj-cs.2554 (PMC11623117; doi:10.7717/peerj-cs.2554)
Supplement: Supplemental Information 4 [file peerj-cs-10-2554-s004.xlsx]

## Sheet: Sheet1
	Requirements	class
0	'The system shall generate a report outlining what effect the malware has done during execution in an isolated environment. '	INT
1	'The system shall be able to generate and send periodic logs the parentís smartphone '	INT
2	'The system shall retain video logs that only have motion. '	INT
3	'The system shall enable the detected cryptojacking domain or application to be logged, along with the date and time of detection. '	INT
4	'The system shall keep logs for every operation made by the user for audit trailing commitments.'	INT
5	'The system shall make it easy to trace an individualís activities after a crime has taken place.'	INT
6	'The system shall access personally, identifiable information to allow investigators to be able to reconstruct a criminal event after it happens, thereby securing the evidence. '	INT
7	'The system should be able to produce an audit report summary to send to the user of the system. '	INT
8	'The system shall provide availability of the audit report to users '	INT
9	'The system shall allow log capture to be a background process making the auditorís job much easier. '	INT
10	'The system shall enable specific logs from the computers to be captured and faultlessly interfaced with the web-based application with the help of security mechanism including HMAC and PGP. '	INT
11	'The system shall ensure that the originator of the log files that are required, recognizing the data items and data structures that are necessary for exchange. '	INT
12	'The system shall show Logs investigator activity '	INT
13	'The system shall allow every history of scans to be recoverable in case of system interrupt'	INT
14	'The system shall provide audit trails when required. '	INT
15	'The system shall be able to log the IP address accordingly '	INT
16	'The system should be able to log all activities taking place on the system for audit trial purposes '	INT
17	'The system shall be able to allow logging of each user activity. '	INT
18	'The system shall be able to apply automatic recording of events and some incidents Security '	INT
19	'The system shall enable the administrator to log into the system and to upload the captured traffic data into the analysis system so as to be accessed by any other administrators available. '	INT
20	'The system shall be able to inspect SSL certificate. '	INT
21	'The system shall automatically acquire a forensic image of the compromised VM main memory upon detection of a severe intrusion. '	INT
22	'The system has got an audit or logging mechanism which enables the user to check and view if there were other malicious activities that have been happening when after they logged out of the system. '	INT
23	'The system shall be able to show a section which displays the last time a user logged in the system and a summary of the activities they did on the system upon logging in. '	INT
24	'The system implements a PDP scheme which allows the user to audit and check if the untrusted server or an adversary did not compromise the integrity of the uploaded data. '	INT
25	'The system shall allow Analysis of locations prevalent crime using crowd-sourced data and reports data. '	INT
26	'The system shall allow a user to check netstat and recent network connections to see if rogue node it a victim of pivoting and if so trace the attacking machine. '	INT
27	'The system shall allow a user to recover unique identifiers of the node which was used to generate the nodeís unique ID/fingerprint upon registration when the owner entered/joined the university with it '	INT
28	'The systemís listening for scanning is done while listening to the OS activities. '	INT
29	'The system shall notify the administrator of who accesses the system in case a data breach occurs. '	INT
30	'The system shall maintain audit logs '	INT
31	'The system shall be introduced in each representativeís mobile device to screen the gadgetís applications and record the activities performed by the gadget. '	INT
32	'The system shall show a panel for logs of the anomalies detected.'	INT
33	'The system shall maintain information on log in and log out for accountability. '	INT
34	'The system shall collect and analyse data that the child is typing and if it captures certain keywords or a continuous sequence of expletive, it should send an alert through text to the parent. '	INT
35	'The system shall generate and send periodic logs to the parentís smartphone. '	INT
36	'The system shall be able to generate periodic logs as well as collect and analyse data alerting parents whenever certain keywords are typed. '	INT
37	'The system shall have an analyser which will execute the Malware files to inspect the type '	INT
38	'The system shall be web based and therefore guarantees maximum availability of data to the cloud data owners'	AVA
39	'The application will be available as a standalone application which will be installed on usersí virtual machines and thus will not be affected by network availability, '	AVA
40	'The system shall allow high availability of the application whenever the user needs it so a recovery module will be set in case of loss of the mobile phone. '	AVA
41	'The system shall allow that if the mobile phone is not present, some authentications are done by the user to obtain access to the system'	AVA
42	'The system shall be up and running all the time since its checking or monitoring the childís behavior and prevent any media from being sent or received using Bluetooth '	AVA
43	'The system shall allow for operation at all times. '	AVA
44	'The system shall ensure that the downtime of internet will not affect its availability as any user can still be granted or denied access to the system. '	AVA
45	'The system shall circumvent the electricity power cuts challenges by the use of UPS (uninterrupted power supply). '	AVA
46	'The system shall provide access whenever the user needs to check publicly available records of an individual, they should be able to do so since social media details are always available '	AVA
47	'The system shall be able to function as desired all the time. '	AVA
48	'The proposed systemí logistics are easily accessed hence its availability is guaranteed when and as required. '	AVA
49	'The system should work all the time and provide a means to handle errors with little or no input from the user. '	AVA
50	'The service of the system must always be available whenever it is needed '	AVA
51	'The system guarantees reliability and availability because the tools used in developing the system (Apache Kafka and Apache Storm) allows the system to be resilient to failure and to be available all the time. '	AVA
52	'The systemís logistics are usually accessed hence its availability is guaranteed when and as required. '	AVA
53	'The system shall be able to notify the respected parties of the clinical incident even when there is a fault '	AVA
54	'The system should work all the time and provide a means to handle errors with little or no input from the user. '	AVA
55	'The system should be able to provide data for the current maximum number of tags presently two thousand for a period of thirty days in whatever format the user decides. '	AVA
56	'The system will deliver emails whenever there is internet connection to receive the emails with minimal downtimes '	AVA
57	'The system will operate round the clock '	AVA
58	'The system shall have high availability wherever it is needed. '	AVA
59	'The system shall be available to users all the time to ensure a 24/7 service delivery and give results in a short period of time. '	AVA
60	'The system is web based and therefore guarantees maximum availability of data to the cloud data owners. '	AVA
61	'The system will be using local Microsoft based certificates, thus the intention is to ensure availability of the certificate authority at all times.'	AVA
62	'To on the system, The system shall provide redundancy to avoid a single point of failure and reduce interruptions which will render the system unusable. '	AVA
63	'The system shall be available at all times, meaning the user can access it using a device application which addresses the user concern for how dependable the system is during normal operating times. '	AVA
64	'The system must be considered downtime impact on the business, transport unavailability and minimizing unavailability.'	AVA
65	'The framework ought to be accessible wherever it is required. At whatever point the clients needs to make a purchase'	AVA
66	'The system in terms of responsiveness is a real time system such that clients can easily access medical records of babyís at any given point in time. '	AVA
67	'The system shall be designed with ease of access in mind as the data may be needed in emergency situations. '	AVA
68	'The system shall have high availability in such a way that it remains accessible online even during maintenance. '	AVA
69	'The system shall that the information collected from the previous stage of life should be readily available in any stage and whenever it is required by the rightful user '	AVA
70	'The system shall be able to do random check on connection. '	AVA
71	'The systemís QoS shall guarantee its availability at 99.9% uptime.'	AVA
72	'The framework shall be accessible, wherever and whenever a client needs to make a purchase. '	AVA
73	'The system shall be available to secure the files from unauthorised users. '	AVA
74	'The system shall be developed to be available all the time. '	AVA
75	'The system shall ensure that the public key is left open and accessible to the public domain. '	AVA
76	'The system shall be up and running all the time as long as the smartphone is in use to monitor the childís activities. '	AVA
77	'The system shall allow the user to generate their ECC public and private keys. These keys are to be used for the encryption of the AES encryption key and also for PDP. '	CON
78	'The system shall allow secure uploaded files using AES algorithm with a 256-bit key. '	CON
79	'The system shall automatically encrypt the files that will be uploaded by the user for storage using a 256-bit encryption key. '	CON
80	'The system shall employ encryption technics at the database side and use HTTPS when accessing networked resources over the internet'	CON
81	'The system should preserve the userís privacy by not publishing the monitored network traffic, and not exposing the userís registered email address.'	CON
82	'The system should not violate laws by not infringing the privacy of sensitive user information and intellectual property rights. '	CON
83	'The system should be able to secure the messages by encrypting them. '	CON
84	'The system should keep history of the transactions in a secure database. '	CON
85	'The system shall be accessible to users via HTTPS web portal '	CON
86	'The system should be able to enforce privacy of data by encryption of data during transmission. '	CON
87	'The system shall ensure encryption of data during transmission. '	CON
88	'The system shall ensure that the login password is stored in encrypted format. '	CON
89	'The system shall provide storage of all important information in a secure database '	CON
90	'The system shall automatically store credential information in a central database '	CON
91	'The system shall use a secure path of sending all the useful credentials to the platform '	CON
92	'The system shall never display a userís password. It shall always be echoed with special characters representing typed characters. '	CON
93	'The system shall be able to use PGP to maintain security of the log files'	CON
94	'The system through pgp will incorporate both symmetric key and public key cryptography to ensure confidentiality of the log files during transmission. '	CON
95	'The system shall enable implementation of clear secure data exchange protocols and document the interfaces and the protocols being utilized. '	CON
96	'The system shall maintain full patient medical records in an encrypted format on a server. '	CON
97	'The system shall enforce encryption on all files, communication channels and backups. '	CON
98	'The system should ensure that there is maximum confidentiality and safety assurance on the information. '	CON
99	'The system ensure a secure storage of the user patterns so as to protect against compromise attackers. '	CON
100	'The system shall be able to hash passwords '	CON
101	'The system shall be able to encrypt communication '	CON
102	'The web application will be secured by hardening and protecting the servers and restricting access from the outside. '	CON
103	'Information relating to passwords must be confidential '	CON
104	'The system shall allow the user to encrypt/decrypt messages using AES algorithm '	CON
105	'The system shall allow the user to embed the encrypted message and retrieve encrypted message from the image using LBS technique '	CON
106	'The system must also allow users to communicate securely knowing that their confidential data is safe from eavesdroppers. '	CON
107	'The system shall be able to ensure the user passwords and data will be encrypted to ensure that user information is secured '	CON
108	'The system player shall be responsible for hashing the trimmed partsí names. '	CON
109	'The player will hide the trimmed files from any direct contact with user or attacker, thereby reliably depriving any illegal sharing of files. '	CON
110	'The system shall allow an author who desires to protect his/her work from unauthorized use, to upload an image to embed the invisible digital watermark whenever submitting a piece of art. '	CON
111	'The system shall have encrypt and decrypt modules in place to attain better and improved security, for containing privacy invasions in overall. '	CON
112	'The system shall be secured against environmental threats and this is one of its prime function. '	CON
113	'The system must generate a shared encryption key, upon registration. '	CON
114	'The system shall be able to allow the user to generate their ECC public and private keys. These keys are to be used for the encryption of the AES encryption key and also for PDP. '	CON
115	'The system shall be able to secure uploaded files using AES algorithm with a 256-bit key. The system shall automatically encrypt the files that will be uploaded by the user for storage using a 256-bit encryption key. '	CON
116	'The system enhances security through the use of more secure and efficient enciphering algorithms, that is Advanced encryption standard with a 256-bit key and Elliptic curve cryptography. '	CON
117	'The system will employ encryption at the database side and use HTTPS when accessing networked resources over the internet. '	CON
118	'The system shall allow the radiologist to, encrypt and upload the images to the cloud. '	CON
119	'The main system is centered around security on online transactions hence it is secure. '	CON
120	'The system shall create hashes of the passwords and store them upon signing up, once a user types password(s) in plain text format. '	CON
121	'The system shall provide a user with the option to encrypt and decrypt data. '	CON
122	'The system shall allow secure storage of client information. '	CON
123	'The system shall allow data input into the system to be encrypted before being sent to the database instance on our cloud server for storage. '	CON
124	'The system shall enable users to retrieve the data on demand including in cases of emergency where it should be retrieved and decrypted before it can be accessed by the medical practitioner. '	CON
125	'The system shall ensure that the system records shall be encrypted and stored in the cloud as cyphertext. '	CON
126	'The system shall guarantee the privacy of user data at all times. '	CON
127	'The system shall use symmetric key encryption AES and asymmetric encryption key on the browser/client side to secure confidentiality of information. '	CON
128	'The system shall ensure confidentiality of vital personal information collected at all the systemís controllers. '	CON
129	'The system shall ensure that personal information is not displayed to the public but is encoded in a QR code '	CON
130	'The system shall hash the passwords using HMAC '	CON
131	'The system shall encrypt and decrypt files over a wireless connection. '	CON
132	'The system shall encrypt files using AES algorithm.'	CON
133	'The system shall guarantee confidentiality through encryption of stored data with AES. '	CON
134	'The system shall provide mechanisms for the security of online transactions. '	CON
135	'The system server shall be able to encrypt video content before it is downloaded. '	CON
136	'The system shall enable the client to decrypt video content to a virtual file and parse the location to media players.'	CON
137	'The system shall encrypt and decrypt files using a wireless connection. '	CON
138	'The system shall offer confidentiality through encryption with AES. '	CON
139	'The system shall secure the network by SSL to encrypt sensitive data before it travels within a network and decrypt it when it arrives at an agent server. '	CON
140	'The system shall produce encrypted payload and the message signature. '	CON
141	'The system shall ensure that each private key has to be encrypted with a password to keep it secure. '	CON
142	'The system shall ensure that sensitive information of transaction details should be hashed in the database, in case of a data breach.'	CON
143	'The system shall enable encryption and decryption capabilities to protect files. '	CON
144	'The system shall be abstracted from the user and the application has no user interaction hence the chances of users breaking it are very limited'	INT
145	'The system shall be able to block internet connection to the computer doing port scanning.'	INT
146	'The system shall be able to filter harmful websites against URLsí of known harmful websites. Access to known harmful websites shall not be permitted.'	INT
147	'The system shall allow the cryptojacking application to be terminated unless the user explicitly selects to ignore the cryptojacking application. '	INT
148	'The system should be able to block traffic to and from the network that is identified to be potentially malicious.'	INT
149	'The system shall implement input validation to help in increasing fault tolerance and ultimately reliability. '	INT
150	'The system database storing keywords will be secured against SQL injection attacks to reduce false positives. '	INT
151	'The system shall be able to block any illegitimate detections so as to render efficiently utilise system resources. '	INT
152	'The system shall be able to validate input'	INT
153	'The system shall resist unofficial and unlawful usage even the action is by accident or intended. '	INT
154	'The system shall not be vulnerable to the security attacks '	INT
155	'The system shall put proper controls for user input validations and configuration management to resist software tempering '	INT
156	'The data provided by the system should be validated and verified were possible.'	INT
157	'The system shall not support reverse engineering of its source code '	INT
158	'The system should be able to identify and trap user input error '	INT
159	'The system shall be able to identify acceptable low false positive rates. '	INT
160	'The system will have a very low False Positive Rate so that it can correctly identify the false positive calls and differentiate them from the real vulnerability ones. '	INT
161	'The system will have a very low False Negative Rate which means it be able to detect an actual vulnerability when it exists. '	INT
162	'The systemís ability to produce a trimmed output will deprive an attacker (pirate) access to a single complete song file from any point onwards. '	INT
163	'The system will ensure that general users will only have access through the user interface. '	INT
164	'The system shall provide a section for verification in the sense that if an image is said to have a watermark it should be able to detect and display the watermark.'	INT
165	'The system shall in the event that a watermarked image is submitted twice or more by different authors, the administrator shall be able to verify the legitimate owner of the image to protect the owner copyrights. '	INT
166	'The system shall provide a secure channel of communication between the backend system and the web user interface. '	INT
167	'The system components are not going to be degraded by weather changes such as heat or humidity even the casing will be designed to suit the prevailing weather conditions. '	INT
168	'The system shall be fast in intrusion response, to help in stopping the intensity of the damage or mitigation of the risk. '	INT
169	'The system shall be safeguarded against deliberate and intrusive faults from internal and external sources as it has proper controls such as user input validations and anti-software tempering '	INT
170	'The system shall implement a combination of cryptographic algorithms that are secure and have proven to be unbreakable by the current technologies, hence using these algorithms collectively strengthens the security of the system. '	INT
171	'PlutoMail will offer spam protection at server level and eliminates the need to install and update antispam software on each desktop. '	INT
172	'The system shall allow a user to block internet to the computer doing port scanning. '	INT
173	'The software is a safety-critical one and is used to perform last line of defense protection against attacks, since defects in safety-critical software can lead to serious service disruption or server down time. '	INT
174	'The system shall allow anomalies to be curbed after detection. '	INT
175	'The system shall offer secured web application SQL and XSS scripting vulnerabilities scanner. '	INT
176	'The system shall be self-protective and failure proof, exception handling will ensure that the system is fail safe and gracefully stops under error conditions.'	INT
177	'The system shall generate decoy files to supply to an intruder whenever a suspicious download is detected.'	INT
178	'The system shall blacklist any user that has done identity theft. '	INT
179	'The system shall allow automatic locking after connection is lost.'	INT
180	'The system shall be able to filter outgoing traffic if it contains proxy related request. '	INT
181	'The system shall be able to filter incoming traffic if it is from a proxy server. '	INT
182	'The system shall be able to deny websites listed in the database. '	INT
183	'The system shall lock automatically after the connection is lost. '	INT
184	'The system shall block traffic to and from the network that is identified to be potentially malicious. '	INT
185	'The system shall be able to identify wrong input. '	INT
186	'The system shall offer input validation.'	INT
187	'The system shall allow file type filtering to avoid the overloading of the normal flow information with unnecessary files. '	INT
188	'The system shall filter harmful websites against URLs of known harmful websites. '	INT
189	'The system shall prevent any media from being sent or received using Bluetooth. '	INT
190	' The system shall ensure the database containing keywords shall be protected against SQL Injection '	INT
191	'The system shall detect SQL Injection and XSS vulnerabilities for a given website or a web application'	INT
192	'The system shall detect SQL Injection and XSS vulnerabilities for a given website or a web application '	INT
193	'The system shall be used to detect the presence of malware in an Android application, identify possible malware families and classify them accordingly into their families. '	INT
194	'The system shall show a report containing detailed results found in files submitted for analysis and will clearly indicate which file is malicious and which one is benign. '	INT
195	'The system shall focus on known and unknown malware families with the aim of unearthing newly developed malware which are potentially harmful to the Android applications. '	INT
196	'The system shall be able to listen for any port scan on university WIFI network.'	INT
197	'The system shall be able to check netstat and recent network connections to see if rogue node is a victim of pivoting and if so trace the attacking machine. '	INT
198	'The system shall be able to note hostname of rogue node as well as the SSID of the network it is connected to so as to know from which section on campus is the attack being done. '	INT
199	'The system shall allow background processes to monitor for any scan and relay information to the registry about any unusual activities '	INT
200	'The system shall allow Network traffic monitoring in real-time by capturing incoming and outgoing TCP, HTTP(S) and TLS web traffic, in order to correlate it with configured cryptojacking blacklist. '	INT
201	The system shall analyse TCP, HTTP(S) and TLS web traffic, to detect network connections to known cryptocurrency mining pools or service providers such as BTC.com and coinhive.com '	INT
202	'The system shall monitor CPU usage to detect spikes caused by cryptojacking by constantly reading the computerís current CPU utilization percentage and compare it to the CPU usage baseline, and detect the extreme spikes or deviations from the usual. '	INT
203	'The system should be reliable in detecting known cryptojacking malware activity. '	INT
204	'The system should be able to sniff the traffic to and from the network in real timeí. '	INT
205	'The system should be able to analyze the network traffic and detects intrusion, attacks and threats to the network.'	INT
206	'The system is effective because it will detect normal attacks which current systems do not detect.'	INT
207	'The system will show the alert messages in case an anomaly has been detected and it will also show a panel of logs of the anomaly detected. '	INT
208	'The system must be able to deal with network threats on the computer it would be installed on. '	INT
209	'When packets come in through the NIC, the system should be able to detect traffic out of the norm. '	INT
210	'The system shall be detecting intrusions specific to a designated area of protection '	INT
211	'The system shall be detecting denial of service attacks to include service overloads, broadcast storms and also message flooding '	INT
212	'The system shall be able to detect spam messages and direct them to spam in real time '	INT
213	'The system functions as an IDS/IPD and aids in relieving traffic targeting the server, in the event that a distributed DOS attack occurs and the server is flooded with the requests and is therefore unable to provide its usual service(s) to the client. '	INT
214	'The system shall be able to detect SQL Injection and XSS vulnerabilities for a website or a web application. '	INT
215	'The system shall be able to analyse the detected vulnerability. '	INT
216	'The system shall be able to generate a report of the detected and analysed vulnerabilities. '	INT
217	'The system scanner may accept a certain number of URLS that should test them for selected vulnerabilities. '	INT
218	'The system should be able to carefully diagnose the real vulnerabilities when they exist based on conducting formula-based experiments. '	INT
219	'The system shall analyse and record suspicious packets signatures and detects an anomaly if the following packets data matches the recorded threat related signatures. '	INT
220	'The system shall use honeypot which records and analyses packets flowing through the network. A honeypot is a system decoy which is used to make the attacker believe that he/she is attacking the intended system. '	INT
221	'The system shall capture network traffic between the hypervisor and the subject/monitored virtual machine. '	INT
222	'The system shall allow a user to listen for any port scan on university WIFI network. '	INT
223	'The system shall allow background processes to be monitoring for any scan and relaying information to the registry about any unusual activities.'	INT
224	'The software will look at port scanning only on the host it will be deployed on, this will devote all the listen to one part of the many policies in a computer. '	INT
225	'The system finds indicators (patterns, attributes) of, or to exploit vulnerabilities known to exist, in the detected services / software versions'	INT
226	'The system shall report when a form of identity theft is noticed. '	INT
227	'The system shall notify administrators of a proxy requesting IP address or identity. '	INT
228	'The system shall allow for anomalies to be curbed after detection.'	INT
229	'The system shall be able to sniff the traffic to and from the network in real-time. '	INT
230	'The system shall analyse the network traffic and detects intrusion, attacks and threats to the network. '	INT
231	'The system shall be able to warn the network administrator about the possible occurrence of an intrusion attack and provide information regarding that attack.'	INT
232	'The system shall be able to detect novel attacks which current systems do not yet detect. '	INT
233	'The system shall be able to detect fraudulent transactions in rea-time. '	INT
234	'The system shall be capable of Malware detection and classify of both known and unknown Malware into their respective families. '	INT
235	'The system shall be able to detect and combat both existing and new Malware. '	INT
236	'Allow the user to check the integrity of stored data through the PDP NSR. '	INT
237	'The system shall allow a user to sign a document on behalf of the group using his secret key '	INT
238	'The system shall allow verification of watermarked image which is submitted twice or more by different authors to protect the ownerís copyrights '	INT
239	'The system shall allow a user to sign a document on behalf of the group using his secret key '	INT
240	'The information entered is only altered by the user upon authentication being done to verify. '	INT
241	'Permissions to access the system data should only be altered by the systemís data administrator.'	INT
242	'The proposed system shall provide access permissions for application data may only be changed by the systemís data administrator and data stored in the database to be hashed. '	INT
243	'The system should use hmac to maintain integrity of the log files and detect when file has been modified using the technology '	INT
244	'The system uses HMAC to maintain integrity of log files. '	INT
245	'The system shall ensure that a secure and effective interface is established to reduce the affiliated risk of errors from inaccurate data formats. '	INT
246	'The data provided by the system should be validated and verified were possible. '	INT
247	'The results from the scanning process must be reliable, which means minimum or no false positives'	INT
248	'The system shall allow the user to sign a document '	INT
249	'The system shall allow the user to check for data integrity using MD5 hash algorithm '	INT
250	'The system shall allow for checking data integrity '	INT
251	'The system should have the ability to validate entered data hence reducing redundancy and duplication in the database. '	INT
252	'Use of a central database to enable real time data capturing and manipulation to facilitate access to laptop details from any computer connected to the database. '	INT
253	'The system shall not permit input of wrong data type. '	INT
254	'The systems administrator should maintain the system and its databases to ensure integrity and availability of information.'	INT
255	'The system shall ensure that, as a watermark is an essential part of data, it must continue even after signal processing and data manipulation including malicious operation that endeavors to remove the watermark. '	INT
256	'The system shall preserve the integrity of acquired forensic imagines by applying integrity checksums and hashes. '	INT
257	'The system shall be able to allow the user to check the integrity of stored data through the PDP functionality. '	INT
258	'The system security shall add an extra layer of defense making it difficult for an adversary to successfully gain unauthorized access to the system and compromise the integrity of the stored data. '	INT
259	'The system shall enable the radiologist to verify the integrity of stored images through the PoR functionality. '	INT
260	'The system shall verify the SSL certificate on a given web server to make sure it†is correctly installed, valid, trusted and doesn't give any errors to any of the users.'	INT
261	'The system shall execute its tasks accurately when issued a command. Testing will ensure that all functions are properly included. '	INT
262	' To system shall allow changes to be made in an authorised manner '	INT
263	'The system shall ensure integrity and consistency in all its processes. '	INT
264	'The system shall process the data received and generate an md5 hash of the data. '	INT
265	'The system shall provide the integrity service through use of md5 hash values to prevent unauthorised modification '	INT
266	'The system shall allow only the legitimate user to modify stored information '	INT
267	'The system shall distribute authentic copies of each supplied video. '	INT
268	'The system shall enable authorised reversal of actions. '	INT
269	'The system shall be easy to maintain as it can easily be integrated with other systems, modified or reused on other different platforms, '	AVA
270	'The system shall apply a number of methods, such as regular maintenance, to facilitate reliability assurance of the system, '	AVA
271	'The system shall be easy to transfer to another environment, including install ability'	AVA
272	'The system shall have independent classes for databases so they can be maintained, tested and system improvements can be done easily '	AVA
273	'The system shall be updated with patches and newer versions when required'	AVA
274	'New exchange interfaces should be easily integrated into the already existing system without modifying core functionality of the product software. '	AVA
275	'The system shall ensure easy maintainability by enforcing best practices in documentation, applying complexity avoidance strategy, and following basic programming practices. '	AVA
276	'The system shall be maintainable by enforcing modularity which makes the system components loosely coupled such that they can be modified independently and then reintegrated into the system. '	AVA
277	'The system shall maintain a strict documentation including comments in the source code so as to make the code easy to modify and debugging. '	AVA
278	'The system shall be easy to maintain since the application has a clear separation of its database and logic code making it easy to sandbox the system and maintain it without affecting the whole system. '	AVA
279	'The system shall be maintained through frequent updates. '	AVA
280	'The system shall have a modular design catering for corrective, perfective, adaptive and preventive maintenance. '	AVA
281	'The system should be easy to maintain such that the modules should easily interact effectively and in case of failure, a re-initialization of the program is recommended. '	AVA
282	'The system shall allow for easy maintenance. '	AVA
283	'This system will be easy to maintain as it will be deployed with the documentation associated with it including code snippets which allows the project to be transferable to another maintenance or updating. '	AVA
284	'The system should be maintained properly so that it should be able to resolve any data conflicts and sustain at any condition. '	AVA
285	'The program coding should be well documented and laid out particularly to facilitate future upgrades and additional features being added at a later date. '	AVA
286	'The system should be developed with future upgrades and additional functionality being added to a later date '	AVA
287	'The system should be able to provide data for the current maximum number of tags presently two thousand for a period of thirty days in whatever format the user decides'	AVA
288	'The system must be scalable '	AVA
289	'The system components shall be expandable. '	AVA
290	'The system does not use much hardware and software, hence it is not costly to maintain the system and the system does not require maintenance regularly. '	AVA
291	'The system does not need frequent updates to its signatures as it will be learning on its own and updating its signatures on its own. '	AVA
292	'The system maintainability shall be implemented through the use of proper coding principles and practices such as putting comments in a proper, organized and standard manner in the program. '	AVA
293	'System modules will be loosely coupled to allow for easy maintainability when used by the users. '	AVA
294	'The system shall be able to handle a growing amount of work and also to be enlarged in order to accommodate that growth. '	AVA
295	'The system is easy to maintain as it offers modularity, understandability, changeability, testability, reusability and transferability from one team to another. '	AVA
296	'The system must allow scalability so as to perform legitimate modification of user data. '	AVA
297	'The system must be supported by the following characteristics, testability, adaptability, extensibility, serviceability and localizability. '	AVA
298	'The system should be maintained properly so that it should be able to resolve any data conflicts and sustain at any condition. '	AVA
299	'The program coding should be well documented and laid out particularly to facilitate future upgrades and additional functionality being added at a later date. '	AVA
300	'The system should be developed with future upgrades and additional functionality being added at a later date. '	AVA
301	'The system is deployed as an application on user machines thus it is cost-effective to maintain as it does not have many modules and online documentation including system documentation and test documentation for easy user acclimatization. '	AVA
302	'The system shall be able to be easily maintained and updated with new data that emerge since the spammers will be trying to bypass the filter with new tricks being employed. '	AVA
303	'The system should be easy to maintain and it should be modifiable.'	AVA
304	'The system will stand in-between the client and the server, however, it is associated within the serverís architecture. '	AVA
305	'The system will be divided into modules i.e downloader, trimmer, player to enhance the maintainability of the system and its troubleshooting '	AVA
306	'The Intrusion Detection module will be based on a tried and tested architecture and the same will apply to the memory acquisition tool, to avoid violating the proper coding principles as well as best practices for documentation. ''	AVA
307	'The system is a lightweight app which has all the algorithms and libraries engraved within itself for easy management of information which that app would be working with thus making its maintenance easy and simple. '	AVA
308	' The system shall be reliable as routine maintenance shall be done often. '	AVA
309	'The system will cater for its ability to be extended with more features and functionalities without compromising its original one or affecting the operations of the user. '	AVA
310	'The proposed system shall be designed such that any glitch can be fixed in no time to restore service to users and it will allow adding functionality easily. '	AVA
311	'The system is easy to maintain as it can easily be integrated with other systems, modified or reused on other different platforms '	AVA
312	'The system is able to automatically adapt to the email environment to constantly tune and improve spam detection. '	AVA
313	'The product can be corrected by updates, patches and with newer versions when required. '	AVA
314	'The system shall allow that as the number of patient records increases with time and the capacity of the system to hold these records must also increase as the records increase. '	AVA
315	'The system components shall be built with reusability so it can be integrated into other systems. '	AVA
316	'The system shall be clearly documented so as to allow easy maintenance on different environments on which the system will be installed. '	AVA
317	'The system shall be maintainable as it can be integrated with other systems easily, can be modified or have its components reused on other platforms.'	AVA
318	'The system shall be flexible and adapts to changes. '	AVA
319	'The system shall not require constant updating of its signature as it will be learning on its own and updating its signatures on its own. '	AVA
320	'The system shall be able to predict potential operational performance bottlenecks and future scalability problems.'	AVA
321	'The system shall be easy to maintain as it shall be built following best practices in documentation, complexity avoidance and good programming strategies. '	AVA
322	'The system shall employ good coding principles like loose coupling of modules for easy maintainance. '	AVA
323	'The system shall be simple and easy to maintain. '	AVA
324	'The system shall be able to adapt as new URLs and websites are added to those filtered as they emerge. '	AVA
325	'The system shall be scalable and able to handle growth in data flow leveraging the Twitter API capabilities. '	AVA
326	'The system shall be maintainable as it is built with three modules with commands that avoid violating coding principles '	AVA
327	'The system shall allow for a safe fail whenever there is a fault. '	AVA
328	'The system shall provide maturity, fault tolerance and recoverability in the face of a fault. '	AVA
329	'The system shall provide maturity, fault tolerance and recoverability despite the challenges of balancing development time. '	AVA
330	'The system make use of stored procedures '	INT
331	'The system shall provide maturity, fault tolerance and recoverability.'	AVA
332	'The system shall have fault tolerance and shall have ability to do a safe exit of the program if a problem is encountered '	AVA
333	'The system should pertain to all the situations so that it can be recoverable in any error conditions. '	AVA
334	'The system survives under its boundaries, which also sets limits to its operations, and the limits make up the restrictions. '	INT
335	'The system shall allow individual facility servers to remain unaffected when the central server fails. '	INT
336	'The system shall ensure that the central server remain unaffected when the institutes system fails. '	INT
337	'The system adapts to all types of application and provides maturity, fault tolerance and recoverability. '	AVA
338	'The static attributes of the system predict potential operational performance bottlenecks and future scalability problems early to allow for correction early. '	AVA
339	'The system should pertain to all the situations so that it can be recoverable in any error conditions. '	AVA
340	'The system shall provide all the internal users a backup of the operational and transactional data. '	INT
341	'The system database should be backed up continuously at least once every for hour in order to minimize data loss in the case of a catastrophic failure. '	INT
342	'System must allow clients to run a separate routing protocol from one in ISP network. '	INT
343	'The system shall provide file type filtering so as to avoid overloading the normal flow information with unnecessary files. '	AVA
344	'The system offers little room for a delayed data transmissions and system failures due to error handling procedures and feedbacks. '	AVA
345	'The system shall reduce the occurrence of failure in the system. '	AVA
346	'The system database must be located in a special secure server and must be backups to other servers directly at specific times to avoid loss and damage of data '	INT
347	'The system should allow for quick error recovery. '	AVA
348	'The system should allow room for quick error recovery. '	AVA
349	'The system should allow for quick error recovery. '	AVA
350	'The system will be used at a national level offering reliability, however, it is hard to balance development time but it provides maturity, fault tolerance and recoverability. '	AVA
351	'The system should allow for error recovery. '	AVA
352	'The system shall enable data multiple replications. '	INT
353	'The system shall ensure that the firewall should be able to withstand any load of traffic given to it and be able to filter it efficiently. '	INT
354	'The system shall encompass factors of complex computations, robustness and security. '	AVA
355	'The system shall ensure that the watermark as an essential part of the data remains even after signal processing and data manipulation including any malicious activity '	INT
356	'The system shall guarantee reliability and resilient to failure '	AVA
357	'The system shall allow room for error recovery '	AVA
358	'The system shall provide reliability and fault tolerance through extensive stress testing '	AVA
359	'The system shall allow for error recovery. '	AVA
360	'The system shall offer error handling capabilities. '	AVA
361	'The Zimbabwe Anti-Corruption Commission then verifies the signature using the group public key so that it will be convinced that it actually came from the organisation without the knowledge of the actual signer'	CON
362	'The system shall apply the principle of authentication by notifying if there is a watermark on the image or not '	CON
363	'The system shall be able to authenticate pin entered. '	CON
364	'The system shall allow the Zimbabwe Anti-Corruption Commission to verify the signature using the group public key so that it will be convinced that it actually came from the organisation without the knowledge of the actual signer '	CON
365	'The system shall allow the user to set an email-change password, so that it will subsequently be requested when attempting to change the set userís email address. '	CON
366	'The system shall use a two-way authentication system by combining keyboard activities and mouse movement biometrics to improve security.'	CON
367	'The system shall allow that the features be extracted when the user logs in and a similarity match done to check the authenticity of the user and if a match is successful the user will be granted access or denied in the event of a mismatch. '	CON
368	'The system shall be able to distinguish the legitimate user from an illegitimate one by the use of unique behavioral biometrics '	CON
369	'The system should restrict password attempts to three only. '	CON
370	'The system should be able to carry out authentication of the user through user name and password '	CON
371	'The system should time out after a set period of inactivity'	CON
372	'The system shall enforce security through the use of password protected user accounts '	CON
373	'The system shall allow users to enter their usernames and passwords. '	CON
374	'The system shall be able to detect whether the input credentials are authentic, then accept or else reject if the credentials are incorrect. '	CON
375	'This system provides functionality of verifying userí login credentials against the ones stored in the system.'	CON
376	The system shall ensure that if login credentials are valid, the flow control of the user logging in will pass into the system, otherwise it directs the user back to the login page, and if no information is found, the user should input another licence number, or vehicle registration number.	CON
377	'The system shall allow the user to create an account on the system and logs in using fingerprint. '	CON
378	'The system shall prompt for a password to log in to access the services '	CON
379	'The system shall allow users to have their own user specific key that is generated by the machine and has been added to the list of keys for the MAC generation process '	CON
380	'The system shall allow user validation to be done during login to ensure that the user is who they claim to be '	CON
381	'The system user with privileges should input password and be able to log into the system.'	CON
382	'The system shall apply a mechanism to establish proof of identities, to verify who a particular user is. '	CON
383	'The system shall provide Bluetooth authentication so that users do not need to disable laptop authentication as they have to frequently unlock the laptop during office working hours.'	CON
384	'The system should be able to match fingerprint at login. '	CON
385	'The system shall have a log in screen to allow the network administrator to log into the system'	CON
386	'The system shall have log in and logout capabilities which can be seen as the line of security which most systems should possess for authentication and accountability purposes. '	CON
387	'The system shall enable verifying of the signature using the group public key so that it will be convinced that it actually came from the organization without the knowledge of the actual singer. '	CON
388	'The system shall be able to enable payment which will have 2 factor authentication (static password and OTP) '	CON
389	'The system shall be able to authenticate the username and password '	CON
390	'The system shall be able to authenticate users so that any unauthorized persons should not be granted by the system '	CON
391	'The system should be able to match current faceprint with the faceprints in database '	CON
392	'The system should be able to match RFID card/tag id with the userís face/person id to make for access to be granted '	CON
393	'The system should be able to reject access to the person who presents the tag that belongs to someone else in high probability '	CON
394	'The system shall send a one-time password to the user phone for the completion of the login process '	CON
395	'The system shall be able to ensure the information provided include a unique username, password and some personal details which are needed to verify that the user is eligible to create an account. '	CON
396	' The system shall have an optional email field for recovery in case one forgets password the reset link will be sent to that email with instructions '	CON
397	'The system login page is for already existing users where they provide their unique username and password for verification and once the details are verified they are redirected to mailbox. '	CON
398	'Each user is to be configured with a unique User Name and a password that can be changed when it is necessary. '	CON
399	'Use of passwords to control access to data to reduce corruption and preserve confidentiality. '	CON
400	'The system shall require a password to login the Provider Routers. '	CON
401	'The system shall ask user to provide password. '	CON
402	'The system shall ensure that the authentication server interact with the database to check for registered user from the database '	CON
403	'The system shall allow a lookup of registered users if requested by the authentication server. '	CON
404	'The system shall provide authentication service which is tested when logging into the Django admin panel (back-end) of the system when the user logs into the system by entering credentials created from command prompt when running the manage code. '	CON
405	'The system will ensure user validation will be done during login to insure that the user is valid and that the user only has access to his or her permission data. '	CON
406	'The system principle of authentication applies in that the system notifies if there is a watermark on the image or not. '	CON
407	'The system shall provide access control to the user interface. '	CON
408	'The system shall provide log in and logout capabilities which can be seen as the first line of security which most systems should possess for authentication and accountability purposes. '	CON
409	'The system shall be able to authenticate pin entered. '	CON
410	'The system can be configured to work with a camera, a PC and other access control system to enhance multiple factor authentication. '	CON
411	'The proposed system is meant to use a two-factor user authentication system which ensures that only the registered and legitimate user is able to access the system and upload or view the data. '	CON
412	'The system shall ensure that once the account holder has provided a correct login password, he or she will receive a OTP or code sent either via the email or via the data ownerís mobile phone depending on their settings. '	CON
413	'The system shall implement authentication using PKI. '	CON
414	'The system shall allow a user to log into system and authenticated. '	CON
415	'The system shall allow a user to be authenticated through the use of digitally signed certificates, and again single-sign-on functionality will be fused into the system to allow once off authentication as long as the session is deemed active and valid. '	CON
416	'The system shall allow user authentication process to be done through trusted parties via the internet '	CON
417	'The system allows user re-verification by the usage of AVS and distinct security questions. '	CON
418	'The system connects to web application server and displays the results of the SSL connection including what SSL certificate is installed and whether it gives out the correct intermediate certificates. '	CON
419	'The system shall give the user an option to reset a forgotten password of an existing username by e-mail. '	CON
420	'The system users shall be able to access the system using an existing hard to guess password. '	CON
421	'The system ensures that the user is properly authenticated for every system access. '	CON
422	'Employees shall be identified by a 6 character password. '	CON
423	'The transactionís digital signatures are validated by the Ethereum protocol.'	CON
424	'The transaction data is validated by the smart contract. '	CON
425	'The system shall prompt the user to identify themselves by supplying a username and password. '	CON
426	'The system shall allow the administrator to log in to access the system. '	CON
427	'The system shall enable facial recognition. '	CON
428	'The system shall enable face identification through details about that person if he/she is an employee.'	CON
429	'The system shall allow users to answer questions on their profile after they are requested to fill in questions at registration which will be used as challenge questions when password is forgotten. '	CON
430	'The system shall allow users to download files when they want to use them upon answering correctly the randomly generated questions from their profiles. '	CON
431	'The system shall allow the student to experience single sign on across the universityís web services. '	CON
432	'The system shall provide a secure student authentication and authorisation by using security SAML tokens containing assertions about a subject for communication between trusted parties. '	CON
433	'The system shall generate Using Time-based Passwords via the Google- Authenticator Application. '	CON
434	'The system shall authenticate the user with username and password. '	CON
435	'The system shall validate user passwords. '	CON
436	'The system shall ensure that the password is verifiable whenever they want to log in '	CON
437	'The system shall allow the bank server to verify the credentials of users when logging in for a short period of time. '	CON
438	'The system server shall generate the TOTP value that lasts for the specified amount of time. '	CON
439	'The system generated TOTP shall be a unique passcode that changes after an interval of 30 seconds. '	CON
440	'The system shall enable password changing in a specified time.'	CON
441	'The system shall allow a user to log into his or her own account providing his or her own email address and password. '	CON
442	'The system shall provide authentication service for all users before they can be allowed to embed a watermark through use of an email client. '	CON
443	' The system shall authenticate all users.'	CON
444	'The system shall provide Two Factor Authentication. '	CON
445	'The system shall use QR codes to facilitate access granting. '	CON
446	'The system shall perform user re-verification using AVS and distinct security questions. '	CON
447	'The system shall offer user authentication before any user is granted access to the services. '	CON
448	'The system shall provide Two Factor Authentication. '	CON
449	'The system shall provide authentication by ensuring that the agents compare the watermark keys on the detected images with the keys already stored in the agencyís database. '	CON
450	'The system shall allow a member to spontaneously form a group of n signers using group public keys which associate the group members. '	CON
451	'The system shall allow the recipient to verify the signature using the group public key so that they will be convinced that it actually came from the organisation without the knowledge of the actual signer. '	CON
452	'The system shall have log in and log out capabilities which can be seen as the first line of security which most systems should possess for authentication and accountability purposes. '	CON
453	'The system shall enforce that all users login before they can access the system. '	CON
454	'The system shall allow a user who has a Twitter account to create an application to access tokens. '	CON
455	'The system shall be able to open the door when the pin is correct '	CON
456	'The system shall provide an escrow (PayNow linked to Zimbabwean commercial banks and mobile money platforms) that locks USD until confirmation from seller. '	CON
457	'The system should ensure only the authorized user is able to change the registered email address for receiving cryptojacking alerts. '	CON
458	'The system shall ensure that confidential information can only be accessed to the right individuals. '	CON
459	'The system shall perform verification to determine user and access rights. '	CON
460	'The system shall allow the user to be directed to the options page or back to the login page for retrial. '	CON
461	'The system shall be able to determine whether the login credentials are valid or not, and search for matching results of the particular licence owner, or vehicle information. '	CON
462	'The system shall provide access to sensitive information only to the privileged user '	CON
463	'The system shall display the licence ownerís profile, and the vehicle information'	CON
464	'The system should offer a secure single sign-on platform, which will give access to different application that the user is entitled to access. '	CON
465	'The system shall allow that the user only has access to his or her permitted data. '	CON
466	'The system shall allow use of passwords and usernames to access and modify data '	CON
467	'The system should allow certified medical facilities to access critical patient information as needed. '	CON
468	'The system shall allow approved certified health providers to append information into the encrypted central server. '	CON
469	'The system shall allow for access levels to be implemented on patient information. '	CON
470	'The system should allow only those who are authorized to used and access the system and they will have to log in first to use the system. '	CON
471	'The system shall be able to allow a user to register and sign in for the blood recipient '	CON
472	'The system should only grant access to legitimate users and in the defined stamp. '	CON
473	'The system shall authenticate all users and grant access only to authorized users, to prevent unauthorized access to admin console '	CON
474	'The proposed system will allow only a registered user to be granted access into some restricted zones within the organization. '	CON
475	'The system enforces security administration to manage all the rights to the system features. '	CON
476	'The system shall offer high level security, as it shall give access to authorized users only, '	CON
477	'The system shall be able to ensure the user access controls will be put in place to restrict unauthorized users to access user accounts '	CON
478	'The system shall provide administrator with security to data to make sure that unauthorized users do not access the information. '	CON
479	'The system should have access control mechanism that take into account the use of passwords and individuals access rights. '	CON
480	'The system super administrator should be able to grant access privilege to users and restrict access of information and data users can view or modify at any given time. '	CON
481	'The system should allow use of stringent passwords and different view levels to control access to data to reduce electronic fraudulent activities and unauthorized access to data. '	CON
482	'The system must have a log on feature limiting individual uses to those functions they have a need to access according to their responsibilities. '	CON
483	'The system shall ensure device in one ODPF area must not communicate with another in a different OSPF area. '	CON
484	'The system shall allow authorized user to edit patient details.'	CON
485	' The system shall offer authentication, authorization, configuration management to prevent access to admin console. '	CON
486	'The system shall allow a user to register through sponsorship from relevant Human Resources. '	CON
487	'The system shall allow a user to view content or dashboard. '	CON
488	'The system shall allow a user to manage their own password. '	CON
489	'System shall provide access only to legitimate users, resist unathorised users, accidental or unintended usage. '	CON
490	'The system is a very secure system with log on credentials allowing access to only authorised members. It ensures that information is kept secured at every moment and only the right people have access to records. '	CON
491	'The system shall be able to show clients KYC information to authorised users. '	CON
492	'The system shall allow the administrator to assign roles to users. '	CON
493	'The system shall allow people to connect to their accounts after they initially register with the system and sign in to access it. '	CON
494	'The system shall allow authorised users to manage their files that is update and delete data from their accounts. '	CON
495	'The system shall allow only authorised users to access information and it shall protect usersí data from intruders. '	CON
496	'The system shall be able to allocate resources to the actual student who has requested the service. '	CON
497	'The system shall allow a user to register and log in. '	CON
498	'The system shall be given a platform to select a unique watermark that will be inserted onto a document to protect data by providing ownership to the rightful people. '	CON
499	'The system shall allow an authenticated user to insert a watermark on a document which will be in PDF format. '	CON
500	'The system shall prevent manipulation of the watermark by an unauthorised user. '	CON
501	'The system shall allow files to be accessible only to authorised personnel.'	CON
502	'The system shall resist unauthorised, accidental or unintended usage and provide access only to legitimate users. '	CON
503	'The system shall allow administrator to view IP address. '	CON
504	'The system shall allow administrator to make changes. '	CON
505	'The system shall allow the framework executive to sign on to the site keeping in mind the end goal to see the warning messages. '	CON
506	'The system shall restrict illegal sharing of video content protected by copyright providing a secure algorithm for downloading and playback. '	CON
507	'The system shall ensure that the user can only download if registered with the server. '	CON
508	'The system shall give each user who purchases a copy of a video a lifetime access right to authentic copy the video. '	CON
509	'The system shall deny access to unauthorised users to redistribute the copy they legally purchase. '	CON
510	'The system shall ensure that the communication of the agents and the agency or server is such that only the registered agents can report to the agency. '	CON
511	'The system shall allow access to authorised users only. '	CON
512	'The system shall allow a user to sign a document on behalf of the group using their secret key. '	CON
513	'The system shall ensure that only authorised users are granted access. '	CON
514	'The system shall enable the systems administrator to log on to the website in order to view the notification messages. '	CON
0	The product shall ensure that it can only be accessed by authorized users. The product will be able to distinguish between authorized and unauthorized users in all access attempts	CON
1	Only registered realtors shall be able to access the system.	CON
2	Every user of the system shall be authenticated and authorized.	CON
3	Only authorized users shall have access to clinical site information.	CON
4	Program Administrators/Nursing Staff Members are the only people who shall have access to clinical site details.	CON
5	Only authorized users shall have access to students' personal information.	CON
6	Dr Susan Poslusny and Dr Julie Donalek are the only people who shall have access to students' personal information.	CON
7	Only authorized users shall have access to the portion of the system that interfaces with CampusConnect.	CON
8	Fit Criterion: Dr Susan Poslusny and Karen Sysol are the only people who shall have access to the final class section scheduling for the system that interfaces with CampusConnect.	CON
9	The Disputes application shall ensure that only users with the appropriate access level are allowed to initiate dispute requests.	CON
10	Only users with Update access must be able to initiate dispute requests.	CON
11	The Disputes application shall ensure that only authorized users are allowed to logon to the application.	CON
12	All authorized users once authenticated must be able to logon to the Disputes System	CON
13	If a user account is revoked it can only be re-instantiated by the System Administrator.	CON
14	Only the System Administrator shall be able to reset a revoked user logon account	CON
15	The Disputes application shall manipulate and view business data. Users will not have direct access to data files or databases.	CON
16	Only adjusters can request recycled parts audit reports. No users without an adjuster role shall request recycled parts audits.	CON
17	Only adjusters with a supervisor role can update preferred repair facility ratings. Users without the supervisor role cannot access the repair facility ratings.	CON
18	Only collision estimators shall search for recycled parts. Users without the collision estimator role shall not have access to the search for recycled parts.	CON
19	One insurance company shall not be able to view another insurance companys claim data.	CON
20	The product shall ensure that only company employees or external users with company-approved user IDs may have product access. 100% of all logons shall be by either company employees or external users with company-approved user IDs.	CON
21	Only managers are able to perform search queries for reservations by user. 100% of all search queries for reservations by user shall be from logons of only management logons.	CON
22	The System shall granularly control access rights to all major subsystems. It should be possible to assign access rights to all subsystems independently.	CON
23	All credit card information will be secured on the server and only accessible by authorized Izogn administrators. Information will be encrypted in the database.	CON
24	Only registered customers can purchase streaming movies.	CON
25	A customer can only stream a movie if they purchased it and are within the 2 day viewing period.	CON
26	Only authorized personnel can access customer records in the database.	CON
27	Only administrators can activate a pre-paid card.	CON
28	Only authorized personnel can access sales information.	CON
29	All customer information will be stored on a secure database accessible only to authorized personnel.	CON
30	All credit card information will be encrypted in the database.	CON
31	The product shall provide players no access to information that might reveal the identity of another player	CON
32	The product shall ensure that only supervisors can advertise empty time slots.The product must ensure that supervisors are allowed to access advertise empty time slots.	CON
33	The product shall ensure that only supervisors can enter a caller's schedule.The product must ensure that supervisors are allowed to access advertise empty time slots.	CON
34	The product shall ensure that only supervisors can view schedule of all callers.The product must ensure that supervisors are allowed to access advertise empty time slots.	CON
35	The product shall have security.The product shall provide authentication and authorization.	CON
36	The system shall only be accessed by authorized Corporate Community Grants (CCR) employees. Users must be authenticated using their IBM intranet user name and password.	CON
37	The WCS system shall not allow automatic logins by any user. Cookies containing WCS login information about a user will not be stored on a user's computer.	CON
38	Each team owner will need to use a username and password in order to be authenticated to reach the team owner's page	CON
39	The Commissioner will be the only authorized user per league to adjust league settings.	CON
40	Only authorized user shall access the RFS system. ONLY users that exist in the UAS system with the RFS system assigned to their role(s) shall access the RFS system and use it.	CON
41	User access should be limited to the permissions granted to their role(s) Each level in the PCG hierarchy will be assigned a role and users will be assigned to these roles. Access to functionality within RFS system is dependent on the privileges/permission assigned to the role..	CON
42	The product shall prevent its data from incorrect data being introduced.	INT
43	The system shall have basic data integrity checking to reduce the possibility of incorrect or invalid data being introduced.	INT
44	The system shall protect private information in accordance with the organization's information policy.	INT
45	The system shall be built such that it is as secure as possible from malicious interference.	INT
46	The system shall use the organization's standard virus protection software to help monitor threats to itself.	INT
47	The Disputes System shall generate a User Report that details any new users that have been added and any changes to an existing user's access level. The report will be reviewed for auditing purposes.	INT
48	All additions of new users and modifications to user's access shall be recorded on the User Report.	INT
49	All updates to data files or database must be initiated from the Disputes System.	INT
50	Only valid data shall be entered into the system. No invalid data shall be entered into the system.	INT
51	The product shall free of computer viruses.	INT
52	The system shall prevent malicious attacks including denial of service.	INT
53	The product shall ensure that the database's data corresponds to the data entered by the user. Each conference room reservation in the system will contain the same information as was entered by the user.	INT
54	The product shall prevent the input of malicious data. The product and/or adjacent hardware/software systems' data shall remain 100% uncorrupted each time malicious data is input into the product.	INT
55	The product shall have the ability to receive automatic software updates as new threats emerge. 100% of customers will be able to receive automatic software updates transmitted to the installed product.	INT
56	The System shall maintain consistent security. Any changes in user passwords and/or permissions should take affect in all parts of the System.	INT
57	The website shall prevent its data from being corrupted when incorrect data is entered in.	INT
58	The website shall protect itself from intentional abuse and notify the administrator at all occurrences.	INT
59	Data integrity scripts will be run on a weekly basis to verify the integrity of the database.	INT
60	The website shall make its user aware of its information practices before collection data from them via a Privacy Policy accessible on all pages of the website.	INT
61	The system shall notify customers of changes to its information policy.	INT
62	The system shall reveal private information only in compliance with the organization's information policy.	INT
63	The streaming server will have anti-virus software to prevent infection of malicious viruses.	INT
64	The product shall information Security. The product shall enable privacy by encryption WS-Security and Integrity Checking.	INT
65	The product shall have audit capabilities.The product shall store messages for a minimum of one year for audit and transaction tracking purposes.	INT
66	The product shall be available during normal business hours. As long as the user has access to the client PC the system will be available 99% of the time during the first six months of operation.	AVA
67	The product shall be available for use 24 hours per day 365 days per year	AVA
68	Out of 1000 accesses to the system the system is available 999 times.	AVA
69	The system shall be available for use between the hours of 8am and 6pm.	AVA
70	The system shall achieve 95% up time.	AVA
71	The product shall adhere to the corporate online availability schedule. The application is brought down only within 98% of the scheduled outages per the availability schedule.	AVA
72	The product shall achieve a 98% uptime. The product shall not fail more than 2% of the available online time.	AVA
73	Aside from server failure the software product shall achieve 99.99% up time.	AVA
74	The website shall be available for use 24 hours per day 365 days per year.	AVA
75	The website shall achieve 99.5% up time.	AVA
76	All movies shall be streamed on demand at any time of the day.	AVA
77	The system will provide a 24 hour 800 toll free number for support to its customers.	AVA
78	Velkat staff will be available for phone support between 7am-7pm M-F to provide technical support to the Izogn administrators.	AVA
79	Defect reports will be available to technical units on a 24x7 basis.	AVA
80	The product shall be available 24 hours per day seven days per week.	AVA
81	The system shall have high availability every day of the year.The system must be available for use between 12:00AM and 6:00PM all days of the year.	AVA
82	The system must be available for use between 7:00AM and 11:59PM all days of the year.	AVA
83	The product shall be available 99% of the time. Rationale: To avoid service interruption during busiest customer service response periods. The product shall be available 99.99% of the time for regular business days.	AVA
84	The WCS system shall be available at all times as long as IBM's internal intranet W3 is accessible. The WCS system will be available 95% of the time IBM's internal intranet W3 is available.	AVA
85	The application shall have a downtime of at most 10 minutes per year.	AVA
86	The RFS system should be available 24/7 especially during the budgeting period. The RFS system shall be available 90% of the time all year and 98% during the budgeting period. 2% of the time the system will become available within 1 hour of the time that the situation is reported.	AVA
0	The system shall be configurable to prevent corruption or loss of data already accepted into the system in the event of a system failure (e.g. integrating with a UPS, etc.).	INT
1	The system restore functionality shall result in a fully operational and secure state.	INT
2	This state shall include the restoration of the application data, security credentials, and log or audit files to their previous state.	INT
3	If the system claims to be available 24 by 7 then the system shall have ability to run a backup concurrently with the operation of the application.	AVA
4	The user ID and date or time stamp shall be recorded.	INT
5	This export on hardcopy and electronic output shall leave the actual PHI data unmodified in the original record.	INT
6	The system shall enforce the most restrictive set of rights or privileges or accesses needed by users or groups (e.g. System Administration, Clerical, Nurse, Doctor, etc.), or processes acting on behalf of users, for the performance of specified tasks.	CON
7	The system must be able to associate permissions with a user using one or more of the following access controls: 1) user-based (access rights assigned to each user); 2) role-based (users are grouped and access rights assigned to these groups); or 3) context-based (role-based with additional access rights assigned or restricted based on the context of the transaction such as time-of-day, workstati…	CON
8	The system shall be able to detect security-relevant events that it mediates and generate audit records for them.	INT
9	The system shall record within each audit record the following information when it is available: (1) date and time of the event; (2) the component of the system (e.g. software component, hardware component) where the event occurred; (3) type of event (including: data description and patient identifier when relevant); (4) subject identity (e.g. user identity); and (5) the outcome (success or failu…	INT
10	The system shall provide authorized administrators with the capability to read all audit information from the audit records in one of the following two ways: 1) The system shall provide the audit records in a manner suitable for the user to interpret the information.	INT
11	The system shall prevent modifications to the audit records.	INT
12	The system upon detection of inactivity of an interactive session shall prevent further viewing and access to the system by that session by terminating the session, or by initiating a session lock that remains in effect until the user reestablishes access using appropriate identification and authentication procedures.	CON
13	The system shall enforce a limit of (configurable) consecutive invalid access attempts by a user.	CON
14	The system shall protect against further, possibly malicious, user authentication attempts using an appropriate mechanism (e.g. locks the account or node until released by an administrator, locks the account or node for a configurable time period, or delays the next login prompt according to a configurable delay algorithm).	CON
15	When passwords are used, the system shall provide an administrative function that resets passwords.	CON
16	The software used to install and update the system, independent of the mode or method of conveyance, shall be certified free of malevolent software ('malware').	INT
17	Vendor may self-certify compliance with this standard through procedures that make use of commercial malware scanning software.	INT
18	The system shall support protection of confidentiality of all Protected Health Information (PHI) delivered over the Internet or other known open networks via encryption using triple-DES (3DES) or the Advanced Encryption Standard (AES) and an open protocol such as TLS, SSL, IPSec, XML encryptions, or S or MIME or their successors.	CON
19	The system shall support protection of integrity of all Protected Health Information (PHI) delivered over the Internet or other known open networks via SHA1 hashing and an open protocol such as TLS, SSL, IPSec, XML digital signature, or S or MIME or their successors.	INT
20	The system shall support ensuring the authenticity of remote nodes (mutual node authentication) when communicating Protected Health Information (PHI) over the Internet or other known open networks using an open protocol (e.g. TLS, SSL, IPSec, XML sig, S or MIME).	CON
21	The system, when storing PHI on any device intended to be portable or removable (e.g. thumb-drives, CD-ROM, PDA, Notebook), shall support use of a standards based encrypted format using triple-DES (3DES), or the Advanced Encryption Standard (AES), or their successors.	CON
