# Supplementary material for: Classifying software security requirements into confidentiality, integrity, and availability using machine learning approaches
Source: PeerJ Comput Sci. 2024 Nov 26;10:e2554. doi: 10.7717/peerj-cs.2554 (PMC11623117; doi:10.7717/peerj-cs.2554)
Supplement: Supplemental Information 5 [file peerj-cs-10-2554-s005.xlsx]

## Sheet: Sheet 1
sentence	Class
The system shall be configurable to prevent corruption or loss of data already accepted into the system in the event of a system failure (e.g. integrating with a UPS, etc.).	INT
The system restore functionality shall result in a fully operational and secure state.	INT
This state shall include the restoration of the application data, security credentials, and log or audit files to their previous state.	INT
If the system claims to be available 24 by 7 then the system shall have ability to run a backup concurrently with the operation of the application.	AVA
The user ID and date or time stamp shall be recorded.	INT
This export on hardcopy and electronic output shall leave the actual PHI data unmodified in the original record.	INT
The system shall enforce the most restrictive set of rights or privileges or accesses needed by users or groups (e.g. System Administration, Clerical, Nurse, Doctor, etc.), or processes acting on behalf of users, for the performance of specified tasks.	CON
The system must be able to associate permissions with a user using one or more of the following access controls: 1) user-based (access rights assigned to each user); 2) role-based (users are grouped and access rights assigned to these groups); or 3) context-based (role-based with additional access rights assigned or restricted based on the context of the transaction such as time-of-day, workstati…	CON
The system shall be able to detect security-relevant events that it mediates and generate audit records for them.	INT
The system shall record within each audit record the following information when it is available: (1) date and time of the event; (2) the component of the system (e.g. software component, hardware component) where the event occurred; (3) type of event (including: data description and patient identifier when relevant); (4) subject identity (e.g. user identity); and (5) the outcome (success or failu…	INT
The system shall provide authorized administrators with the capability to read all audit information from the audit records in one of the following two ways: 1) The system shall provide the audit records in a manner suitable for the user to interpret the information.	INT
The system shall prevent modifications to the audit records.	INT
The system upon detection of inactivity of an interactive session shall prevent further viewing and access to the system by that session by terminating the session, or by initiating a session lock that remains in effect until the user reestablishes access using appropriate identification and authentication procedures.	CON
The system shall enforce a limit of (configurable) consecutive invalid access attempts by a user.	CON
The system shall protect against further, possibly malicious, user authentication attempts using an appropriate mechanism (e.g. locks the account or node until released by an administrator, locks the account or node for a configurable time period, or delays the next login prompt according to a configurable delay algorithm).	CON
When passwords are used, the system shall provide an administrative function that resets passwords.	CON
The software used to install and update the system, independent of the mode or method of conveyance, shall be certified free of malevolent software ('malware').	INT
Vendor may self-certify compliance with this standard through procedures that make use of commercial malware scanning software.	INT
The system shall support protection of confidentiality of all Protected Health Information (PHI) delivered over the Internet or other known open networks via encryption using triple-DES (3DES) or the Advanced Encryption Standard (AES) and an open protocol such as TLS, SSL, IPSec, XML encryptions, or S or MIME or their successors.	CON
The system shall support protection of integrity of all Protected Health Information (PHI) delivered over the Internet or other known open networks via SHA1 hashing and an open protocol such as TLS, SSL, IPSec, XML digital signature, or S or MIME or their successors.	INT
The system shall support ensuring the authenticity of remote nodes (mutual node authentication) when communicating Protected Health Information (PHI) over the Internet or other known open networks using an open protocol (e.g. TLS, SSL, IPSec, XML sig, S or MIME).	CON
The system, when storing PHI on any device intended to be portable or removable (e.g. thumb-drives, CD-ROM, PDA, Notebook), shall support use of a standards based encrypted format using triple-DES (3DES), or the Advanced Encryption Standard (AES), or their successors.	CON
