# Supplementary material for: Classifying software security requirements into confidentiality, integrity, and availability using machine learning approaches
Source: PeerJ Comput Sci. 2024 Nov 26;10:e2554. doi: 10.7717/peerj-cs.2554 (PMC11623117; doi:10.7717/peerj-cs.2554)
Supplement: Supplemental Information 6 [file peerj-cs-10-2554-s006.xlsx]

## Sheet: Promise_exp
ProjectID	RequirementText	class
1	The product shall ensure that it can only be accessed by authorized users. The product will be able to distinguish between authorized and unauthorized users in all access attempts	CON
2	Only registered realtors shall be able to access the system.	CON
3	Every user of the system shall be authenticated and authorized.	CON
4	Only authorized users shall have access to clinical site information.	CON
5	Program Administrators/Nursing Staff Members are the only people who shall have access to clinical site details.	CON
6	Only authorized users shall have access to students' personal information.	CON
7	Dr Susan Poslusny and Dr Julie Donalek are the only people who shall have access to students' personal information.	CON
8	Only authorized users shall have access to the portion of the system that interfaces with CampusConnect.	CON
9	Fit Criterion: Dr Susan Poslusny and Karen Sysol are the only people who shall have access to the final class section scheduling for the system that interfaces with CampusConnect.	CON
10	The Disputes application shall ensure that only users with the appropriate access level are allowed to initiate dispute requests.	CON
11	Only users with Update access must be able to initiate dispute requests.	CON
12	The Disputes application shall ensure that only authorized users are allowed to logon to the application.	CON
13	All authorized users once authenticated must be able to logon to the Disputes System	CON
14	If a user account is revoked it can only be re-instantiated by the System Administrator.	CON
15	Only the System Administrator shall be able to reset a revoked user logon account	CON
16	The Disputes application shall manipulate and view business data. Users will not have direct access to data files or databases.	CON
17	Only adjusters can request recycled parts audit reports. No users without an adjuster role shall request recycled parts audits.	CON
18	Only adjusters with a supervisor role can update preferred repair facility ratings. Users without the supervisor role cannot access the repair facility ratings.	CON
19	Only collision estimators shall search for recycled parts. Users without the collision estimator role shall not have access to the search for recycled parts.	CON
20	One insurance company shall not be able to view another insurance companys claim data.	CON
21	The product shall ensure that only company employees or external users with company-approved user IDs may have product access. 100% of all logons shall be by either company employees or external users with company-approved user IDs.	CON
22	Only managers are able to perform search queries for reservations by user. 100% of all search queries for reservations by user shall be from logons of only management logons.	CON
23	The System shall granularly control access rights to all major subsystems. It should be possible to assign access rights to all subsystems independently.	CON
24	All credit card information will be secured on the server and only accessible by authorized Izogn administrators. Information will be encrypted in the database.	CON
25	Only registered customers can purchase streaming movies.	CON
26	A customer can only stream a movie if they purchased it and are within the 2 day viewing period.	CON
27	Only authorized personnel can access customer records in the database.	CON
28	Only administrators can activate a pre-paid card.	CON
29	Only authorized personnel can access sales information.	CON
30	All customer information will be stored on a secure database accessible only to authorized personnel.	CON
31	All credit card information will be encrypted in the database.	CON
32	The product shall provide players no access to information that might reveal the identity of another player	CON
33	The product shall ensure that only supervisors can advertise empty time slots.The product must ensure that supervisors are allowed to access advertise empty time slots.	CON
34	The product shall ensure that only supervisors can enter a caller's schedule.The product must ensure that supervisors are allowed to access advertise empty time slots.	CON
35	The product shall ensure that only supervisors can view schedule of all callers.The product must ensure that supervisors are allowed to access advertise empty time slots.	CON
36	The product shall have security.The product shall provide authentication and authorization.	CON
37	The system shall only be accessed by authorized Corporate Community Grants (CCR) employees. Users must be authenticated using their IBM intranet user name and password.	CON
38	The WCS system shall not allow automatic logins by any user. Cookies containing WCS login information about a user will not be stored on a user's computer.	CON
39	Each team owner will need to use a username and password in order to be authenticated to reach the team owner's page	CON
40	The Commissioner will be the only authorized user per league to adjust league settings.	CON
41	Only authorized user shall access the RFS system. ONLY users that exist in the UAS system with the RFS system assigned to their role(s) shall access the RFS system and use it.	CON
42	User access should be limited to the permissions granted to their role(s) Each level in the PCG hierarchy will be assigned a role and users will be assigned to these roles. Access to functionality within RFS system is dependent on the privileges/permission assigned to the role..	CON
43	The product shall prevent its data from incorrect data being introduced.	INT
44	The system shall have basic data integrity checking to reduce the possibility of incorrect or invalid data being introduced.	INT
45	The system shall protect private information in accordance with the organization's information policy.	INT
46	The system shall be built such that it is as secure as possible from malicious interference.	INT
47	The system shall use the organization's standard virus protection software to help monitor threats to itself.	INT
48	The Disputes System shall generate a User Report that details any new users that have been added and any changes to an existing user's access level. The report will be reviewed for auditing purposes.	INT
49	All additions of new users and modifications to user's access shall be recorded on the User Report.	INT
50	All updates to data files or database must be initiated from the Disputes System.	INT
51	Only valid data shall be entered into the system. No invalid data shall be entered into the system.	INT
52	The product shall free of computer viruses.	INT
53	The system shall prevent malicious attacks including denial of service.	INT
54	The product shall ensure that the database's data corresponds to the data entered by the user. Each conference room reservation in the system will contain the same information as was entered by the user.	INT
55	The product shall prevent the input of malicious data. The product and/or adjacent hardware/software systems' data shall remain 100% uncorrupted each time malicious data is input into the product.	INT
56	The product shall have the ability to receive automatic software updates as new threats emerge. 100% of customers will be able to receive automatic software updates transmitted to the installed product.	INT
57	The System shall maintain consistent security. Any changes in user passwords and/or permissions should take affect in all parts of the System.	INT
58	The website shall prevent its data from being corrupted when incorrect data is entered in.	INT
59	The website shall protect itself from intentional abuse and notify the administrator at all occurrences.	INT
60	Data integrity scripts will be run on a weekly basis to verify the integrity of the database.	INT
61	The website shall make its user aware of its information practices before collection data from them via a Privacy Policy accessible on all pages of the website.	INT
62	The system shall notify customers of changes to its information policy.	INT
63	The system shall reveal private information only in compliance with the organization's information policy.	INT
64	The streaming server will have anti-virus software to prevent infection of malicious viruses.	INT
65	The product shall information Security. The product shall enable privacy by encryption WS-Security and Integrity Checking.	INT
66	The product shall have audit capabilities.The product shall store messages for a minimum of one year for audit and transaction tracking purposes.	INT
67	The product shall be available during normal business hours. As long as the user has access to the client PC the system will be available 99% of the time during the first six months of operation.	AVA
68	The product shall be available for use 24 hours per day 365 days per year	AVA
69	Out of 1000 accesses to the system the system is available 999 times.	AVA
70	The system shall be available for use between the hours of 8am and 6pm.	AVA
71	The system shall achieve 95% up time.	AVA
72	The product shall adhere to the corporate online availability schedule. The application is brought down only within 98% of the scheduled outages per the availability schedule.	AVA
73	The product shall achieve a 98% uptime. The product shall not fail more than 2% of the available online time.	AVA
74	Aside from server failure the software product shall achieve 99.99% up time.	AVA
75	The website shall be available for use 24 hours per day 365 days per year.	AVA
76	The website shall achieve 99.5% up time.	AVA
77	All movies shall be streamed on demand at any time of the day.	AVA
78	The system will provide a 24 hour 800 toll free number for support to its customers.	AVA
79	Velkat staff will be available for phone support between 7am-7pm M-F to provide technical support to the Izogn administrators.	AVA
80	Defect reports will be available to technical units on a 24x7 basis.	AVA
81	The product shall be available 24 hours per day seven days per week.	AVA
82	The system shall have high availability every day of the year.The system must be available for use between 12:00AM and 6:00PM all days of the year.	AVA
83	The system must be available for use between 7:00AM and 11:59PM all days of the year.	AVA
84	The product shall be available 99% of the time. Rationale: To avoid service interruption during busiest customer service response periods. The product shall be available 99.99% of the time for regular business days.	AVA
85	The WCS system shall be available at all times as long as IBM's internal intranet W3 is accessible. The WCS system will be available 95% of the time IBM's internal intranet W3 is available.	AVA
86	The application shall have a downtime of at most 10 minutes per year.	AVA
87	The RFS system should be available 24/7 especially during the budgeting period. The RFS system shall be available 90% of the time all year and 98% during the budgeting period. 2% of the time the system will become available within 1 hour of the time that the situation is reported.	AVA

## Sheet: CPN
Internally to the CPN
Internally to the CPN
The CNG shall detect the end of the life of the key used for cryptographic protection of the wireless communication between the CND and the CNG.;sec
A CPN-user attempting to invoke a CNG-mediated service shall be identified and authenticated by the CNG before being granted access to the service.;sec
The CNG shall implement an authentication failure handling policy.;sec
The CNG shall take action according to local authentication failure handling policy (which may include silently discarding the authentication and explicit failure notification
The CNG should detect replayed user and/or device credentials.;sec
When the CNG detects replayed user and/or device credentials
The CNG shall implement a privacy protection policy specifying as a minimum private and critical information.;sec
When the CNG detects violation of the privacy protection policy the CNG shall discard all signalling
The CNG shall implement an authorization management handling policy.;sec
On reception at the CNG of a message to access configuration information for update and detection of authorization failure the CNG shall reject the request and manage the failure in accordance with the CPN authorization management handling policy.;sec
Where a CND invokes a session at the CNG the CNG shall record the association of session-id
On transmission of management information from the CNG to a CND the CNG shall append a timestamp or sequence number to the outgoing message.;sec
On reception at the CNG of a message containing management information the CNG shall extract the timestamp or sequence number and verify that the message has not been replayed.;sec
On reception at the CNG of a message to access or update configuration information the CNG shall allow access only if the sender is an administrator.;sec
On detection of a message integrity error at the CNG the CNG shall discard the message.;sec
On indication received at the CNG of a resource allocation expiry the CNG shall delete all residual data associated with the invocation of the resource.;sec
On receipt of a valid (i.e. authorized) request for data stored in the CNG the CNG shall return the requested data to the requesting user.;sec
On receipt of a valid (i.e. authorized) request for access to a CNG hosted service or application the CNG shall provide the requested service or application to the requesting user.;sec
On detection of any system failure or discontinuity not specifically handled by other mechanisms the CNG shall revert to a known safe state.;sec
The CNG shall support mechanisms to authenticate itself to the NGN for connectivity purposes.;sec
The CNG shall support mechanisms to authenticate itself to the NGN for service usage purposes.;sec
The CNG shall support mechanisms to authenticate CNDs to the NGN for service usage purposes if they are not able to fully support the related procedures in an autonomous way.;sec
The CNG shall support mechanisms for authentication of wireless CNDs for local connectivity. Similar mechanisms may be also implemented for non-wireless devices.;sec
The CNG and CPN shall support mechanisms that prevent access to the network by unauthorized users.;sec
The capacity of the authorized entities should depend on the security policies defined by the service providers
The CNG and the CPN shall implement mechanisms to limit the visibility of the WAN side network and resources to authorized entities.;sec
The diagnostic operations on the CPN by an operator shall be performed in accordance with rules protecting the users' privacy.;sec
CPN environment shall be protected with a stateful firewall function
The CNG and the CPN shall be able to support parental control related functionalities limiting the use of the broadband connection on a user or time basis. Limitations on a content basis may be shared with devoted network servers.;sec
The CNG shall be equipped with a WAN interface towards the NGN
LAN interfaces. The CNG shall be equipped with at least one Ethernet (minimum 100 Mbit/s) is interface. Optional interfaces could be present
The CNG shall support both routed and bridged modes of operation.;nonsec
The CNG shall support direct intra-LAN connectivity between any appropriate pair of devices on the Customer Premises Network.;nonsec
The CNG shall support different IP address schemes and subnets on the same physical LAN port
The CNG and devices shall support mechanisms to identify and share information about the customer network devices (e.g. type of device and basic capabilities
The CNG shall support use of one user identity on several terminals as well as to share one terminal with several identities.;nonsec
The CNG and the Customer Network shall support the NGN services usage (e.g. voice communications
The CNG should support redirection of IP Multimedia sessions
The CNG and the Customer Network shall assure the confidentiality
The CNG and the Customer Network shall provide the opportunity for a customer network administrator to perform service and network-related configuration. According to the service/network provider choices
The CNG should negotiate session parameters (bandwidth
The CPN shall support remote access
The CNG shall allow the customer remote access to a CND in the Customer Network
Standard NGN authentication
The CNG may use multiple tunnel connections for providing e.g. adequate QoS for the remote access user.;nonsec
The CNG may allow secure dynamic firewall opening for remote access devices based on NGN authentication functions.;nonsec
The CNG may provide Home to Home (H2H) communication service connecting CNDs in different CPNs.;nonsec
If Home to Home (H2H) communication service is provided
If Home to Home (H2H) communication service is provided
The CPN may support encrypted communication with remote access devices
The CNG may act as a proxy for handling messages (requests and responses) related to the remote access scenarios to and from the home.;nonsec
The CNG may support mechanisms supporting nomadism of the users and their subscribed services from one physical customer environment to another.;nonsec
The CNG should be able to assist in establishing Rich Communication Suite sessions between CNDs
It should be possible for more than one identity to be associated with a single CPN subscription.;nonsec
It should be possible for a service profile to be associated with each identity within a CPN subscription.;nonsec
It shall be possible for a single public identity to be associated with multiple CNDs where each association is allocated a unique private identity.;nonsec
Multiple public identities on the same terminal shall be supported.;nonsec
The CNG shall support a mechanism allowing the support of call forking towards customer non-IMS capable devices.;nonsec
The CNG shall able to store information related to private identities of non-IMS capable CNDs.;nonsec
The CNG shall support a mechanism allowing the support of call forwarding toward non-IMS capable CNDs.;nonsec
The CNG shall support intra-CPN communication between IMS and non-IMS capable CNDs.;nonsec
The customer environment (CNG and/or CNDs) should support a mechanism to allow service roaming;nonsec
The NGN network should be provided with a CND location information.;nonsec
Codec requirements and capabilities for the User Equipment (including the CNG) are already defined in TS†181 005 [1] which describes service requirements and capabilities for the TISPAN NGN.;nonsec
The CNG shall support mechanisms for managing IPTV flows provided both in unicast and multicast mode.;nonsec
In case of multicast flows the CNG shall keep a record of which devices are subscribed to which multicast group.;nonsec
An IPTV media flow shall be terminated by a STB or by a specific device called "media gateway" (or "application gateway"). The CNG shall not terminate any IPTV flow by itself.;nonsec
The CNG shall support the connection to a STB (or media gateway) both in a bridged or in a routed mode of operation.;nonsec
Depending on the operation mode chosen (bridged or touted) and on the type of flow treated (unicast or multicast) the CNG shall forward packets only to the physical interfaces which are connected to devices interested to the IPTV flow.;nonsec
In case of multicast streams the CNG should support proxy functionalities to optimize the management of information related to signalling.;nonsec
CNG shall perform a link layer multicast to unicast translation if the STB or media gateway are connected using customer network technologies not supporting multicast flows (e.g. powerlines
STB or media gateways should be equipped with a programmable open API allowing the implementation of specific service logics.;nonsec
Functionalities related to Electronic Programming Guide and DRM management shall be implemented in STB or media gateway and not in CNG.;nonsec
Media flows (data plane) transcoding shall be performed by STB or media gateway and not by the CNG.;nonsec
Protocols adaptation for control plane or management plane may be performed by CNG.;nonsec
Presence related information shall be sent to the NGN by the STB or the CNG (depending on the specific architectural choices
CPN should support user generated content (UGC) using an NGN service.;nonsec
CPN should support storage of UGC within the CPN.;nonsec
Subject to applicable regulation
CPN should support bookmarks (e.g. hyperlinks) to stored and streaming user-generated content in order to store and exchange references to uploaded and streaming UGC
The user should be able to personalize bookmarks to UGC.;nonsec
CPN should support inter-destination content synchronisation of streaming multimedia content. This should achieve that all or a specific group of users consuming specific content get the content presented simultaneously
The CNG and the CPN shall support adequate Quality of Service mechanisms (e.g. prioritize the traffic in the event that there is not sufficient bandwidth in the customer network in order to ensure the correct network performances to each traffic flow). To achieve this objective a number of functionalities shall be supported by CNG and/or CNDs
The NGN network QoS functions shall be possible to use to enhance the end-user experience.;nonsec
The CNG may interact with the Resource and Admission Control Subsystem (RACS) as defined in ES 282 001 [9] to support remote real-time QoS control;nonsec
The CNG may interact with network elements inside the CPN to support QoS control inside the CPN.;nonsec
The CNG shall classify packets entering the CPN through its WAN interface (downstream direction) according to a number of predefined priorities. Classification can be done on the basis of different layer 2 and/or layer 3 parameters.;nonsec
The number of possible values defining the packet priority and
When forwarding packets from the WAN interface to the customer network
The CNG shall classify packets coming from the CPN through its LAN interfaces (upstream direction) according to a number of predefined priorities. Classification can be done on the basis of different layer 2 and/or layer 3 parameters.;nonsec
The number of possible values defining the packet priority and
When forwarding packets from the customer network to the WAN interface
The CNG shall be able to classify intra-LAN traffic that is simply bridged by the CNG itself within the CPN.;nonsec
Traffic marking: depending on what are the parameters used to perform classification
In case of huge amount of traffic in upstream or downstream directions
In case of managed services
In case of unmanaged services
CNG shall be equipped with an application client to be remotely manageable by the service providers for configuration
It shall be possible to configure the CNG (e.g. firmware downloading) according to the subscribed services. This operation may be performed when the CNG is connected to the network for the first time
CNG shall support mechanisms for secure authentication and communication with the remote management system.;nonsec
The CNG shall be associated with a unique Hardware ID to be used for identification NGN side.;nonsec
A suitably authorized CPN user (e.g. the system administrator) shall be able to install and activate NGN managed services without the intervention of the subscribing CPN user.;nonsec
A suitably authorized CPN user (e.g. the system administrator) shall be able to manage and configure the provisioning
A CPN user shall be able to configure any unmanaged service provided to the user.;nonsec
The CNG Remote Management requires to manage a specific set of parameters. At least the following list of parameters shall be available: Customer Identification
For the CNG management it is recommended to use a single protocol
CNDs connected to the CPN and devoted to specific NGN managed services shall be remotely manageable.;nonsec
CNG shall support mechanisms allowing the CNDs remote management when applicable.;nonsec
Protection mechanisms shall be implemented to avoid that a management client could access and modify parameters that is not allow to configure.;nonsec
The CPN (trough CNDs and/or CNG) shall support manual configuration to insert information to access IMS network (e.g. IMPU
The CND directly or through the CNG must be able to access to Network Configuration Service Function without involving any user interaction. ;nonsec
The Network Configuration Server should be able to upload different parameter sets related to service subscription.;nonsec
The CND should be able to support bootstrap capabilities in order to retrieve network configuration data to connect the NGN.;nonsec
The CND/CNG shall support a mechanism allowing the user to manually modify the association between a public identity (e.g. phone number) and a specific private identity corresponding to a single customer device not provided with a UICC and corresponding also to legal service level agreements between the user and the service provider.;nonsec
The CPN (CND and/or CNG) shall support a method to access a Self Configuration Server.;nonsec
The CPN should support a capability to ensure QoS and call prioritization for sessions originating or terminating in the H(e)NB.;nonsec
A CND
Authorized users shall be able to access NGN-based services using any NGN supported home device.;nonsec
Both IMS capable devices with or without UICC and non-IMS capable devices without UICC shall be supported.;nonsec
If the CND contains an ISIM/UICC
If the CND does not contain an ISIM/UICC
The CND shall provide its registration identity
In order to support the NGN services and intra-CPN communications
The CND should support protocols for remote access management.;nonsec
The CND should support protocol for local authentication in CPN/CNG.;nonsec
The CND shall support the NGN services usage (e.g. voice communications
The CND shall support protocol to access the NGN service layer platforms.;nonsec
The CND shall support protocols to access Self Configuration application (as defined in clause 4.1).;nonsec
The CND shall be able to download and install client application services.;nonsec
The CND should be able to communicate its services related capabilities to the CNG.;nonsec
The CND should be able to support one or more codecs for communication services (as defined by TS†181 005 [1]).;nonsec
The CNG shall support mechanisms to authenticate itself to the NGN for connectivity purposes.;sec
The CNG shall support mechanisms to authenticate itself to the NGN for service usage purposes.;sec
The CNG shall support mechanisms to authenticate CNDs to the NGN for service usage purposes if they are not able to fully support the related procedures in an autonomous way.;sec
The CNG shall support mechanisms for authentication of wireless CNDs for local connectivity. Similar mechanisms may be also implemented for non-wireless devices.;sec
The CNG and CPN shall support mechanisms that prevent access to the network by unauthorized users.;sec
The capacity of the authorized entities should depend on the security policies defined by the service providers
The CNG and the CPN shall implement mechanisms to limit the visibility of the WAN side network and resources to authorized entities.;sec
The diagnostic operations on the CPN by an operator shall be performed in accordance with rules protecting the users' privacy.;sec
CPN environment shall be protected with a stateful firewall function
The CNG and the CPN shall be able to support parental control related functionalities limiting the use of the broadband connection on a user or time basis. Limitations on a content basis may be shared with devoted network servers.;sec
The CNG shall be equipped with a WAN interface towards the NGN
LAN interfaces. The CNG shall be equipped with at least one Ethernet (minimum 100 Mbit/s) is interface. Optional interfaces could be present
The CNG shall support both routed and bridged modes of operation.;nonsec
The CNG shall support direct intra-LAN connectivity between any appropriate pair of devices on the Customer Premises Network.;nonsec
The CNG shall support different IP address schemes and subnets on the same physical LAN port
The CNG and devices shall support mechanisms to identify and share information about the customer network devices (e.g. type of device and basic capabilities
The CNG shall support use of one user identity on several terminals as well as to share one terminal with several identities.;nonsec
The CNG and the Customer Network shall support the NGN services usage (e.g. voice communications
The CNG should support or not prevent redirection of IP Multimedia sessions
The CNG and the Customer Network shall assure the confidentiality
The CNG and the Customer Network shall provide the opportunity for a customer network administrator to perform service and network-related configuration. According to the service/network provider choices
The CNG should negotiate session parameters (bandwidth
The CPN shall support secure remote access control
The CNG shall allow the customer remote access to a CND in the Customer Network
Standard NGN authentication
The CNG may allow secure dynamic firewall opening for remote access devices based on NGN authentication functions.;nonsec
The CPN may support encrypted communication with remote access devices
The CNG may act as a proxy for handling messages (requests and responses) related to the remote access scenarios to and from the home.;nonsec
The CNG may support mechanisms supporting nomadism of the users and their subscribed services from one physical customer environment to another.;nonsec
Multiple identities should be supported within the same subscription. Personal service profiles per each identity within the same subscription should be supported. A shared public identity on several terminals
Multiple public identities on the same terminal shall be supported.;nonsec
The CNG shall support a mechanism allowing the support of call forking towards customer non-IMS capable devices and shall able to store information related to private identities of non-IMS capable CNDs.;nonsec
The CNG shall support a mechanism allowing the support of call forwarding toward non-IMS capable CNDs.;nonsec
The CNG shall support intra-CPN communication between IMS and non-IMS capable CNDs.;nonsec
The customer environment (CNG and/or CNDs) should support a mechanism to allow service roaming;nonsec
(i.e. using the same CND in two different CPNs declaring the same public identity). Supporting this scenario for non IMS capable CNDs is still to be discussed.;nonsec
The NGN network should be provided with a CND location information.;nonsec
Codec requirements and capabilities for the User Equipment (including the CNG) are already defined in TS†181 005 [1] which describes service requirements and capabilities for the TISPAN NGN.;nonsec
The CNG shall support mechanisms for managing IPTV flows provided both in unicast and multicast mode.;nonsec
In case of multicast flows the CNG shall keep a record of which devices are subscribed to which multicast group.;nonsec
An IPTV media flow shall be terminated by a STB or by a specific device called "media gateway" (or "application gateway"). The CNG shall not terminate any IPTV flow by itself.;nonsec
The CNG shall support the connection to a STB (or media gateway) both in a bridged or in a routed mode of operation.;nonsec
Depending on the operation mode chosen (bridged or touted) and on the type of flow treated (unicast or multicast) the CNG shall forward packets only to the physical interfaces which are connected to devices interested to the IPTV flow.;nonsec
In case of multicast streams the CNG should support proxy functionalities to optimize the management of information related to signalling.;nonsec
CNG shall perform a link layer multicast to unicast translation if the STB or media gateway are connected using customer network technologies not supporting multicast flows (e.g. powerlines
STB or media gateways should be equipped with a programmable open API allowing the implementation of specific service logics.;nonsec
Functionalities related to Electronic Programming Guide and DRM management shall be implemented in STB or media gateway and not in CNG.;nonsec
Media flows (data plane) transcoding shall be performed by STB or media gateway and not by the CNG.;nonsec
Protocols adaptation for control plane or management plane may be performed by CNG.;nonsec
Presence related information shall be sent to the NGN by the STB or the CNG (depending on the specific architectural choices
The CNG shall classify packets entering the CPN through its WAN interface (downstream direction) according to a number of predefined priorities. Classification can be done on the basis of different layer 2 and/or layer 3 parameters.;nonsec
The number of possible values defining the packet priority and
When forwarding packets from the WAN interface to the customer network
The CNG shall classify packets coming from the CPN through its LAN interfaces (upstream direction) according to a number of predefined priorities. Classification can be done on the basis of different layer 2 and/or layer 3 parameters.;nonsec
The number of possible values defining the packet priority and
When forwarding packets from the customer network to the WAN interface
CNG shall be able to classify intra-LAN traffic that is simply bridged by the CNG itself within the CPN.;nonsec
Traffic marking: depending on what are the parameters used to perform classification
In case of huge amount of traffic in upstream or downstream directions
In case of managed services
In case of unmanaged services
The CNG shall be equipped with an application client to be remotely manageable by the service providers for configuration
It shall be possible to configure the CNG (e.g. firmware downloading) according to the subscribed services. This operation may be performed when the CNG is connected to the network for the first time
The CNG shall support mechanisms for secure authentication and communication with the remote management system.;nonsec
The CNG shall be associated with a unique Hardware ID to be used for identification NGN side.;nonsec
In case of managed services
The CNG Remote Management requires to manage a specific set of parameters. At least the following list of parameters shall be available: Customer Identification
For the CNG management it is recommended to use a single protocol
CNDs connected to the CPN and devoted to specific managed services shall be remotely manageable;nonsec
(e.g. VoIP phones
CNG shall support mechanisms allowing the CNDs remote management when applicable.;nonsec
Protection mechanisms shall be implemented to avoid that a management client could access and modify parameters that is not allow to configure.;nonsec
The CPN (trough CNDs and/or CNG) shall support manual configuration to insert information to access IMS network (e.g. IMPU
The CND directly or through the CNG must be able to access to Network Configuration Service Function avoiding any user interaction. (and so the Network Configuration Server should be able to upload different parameter related to service subscription).;nonsec
The CND should be able to support bootstrap capabilities in order to retrieve network configuration data to connect the NGN.;nonsec
The CND/CNG shall support a mechanism allowing the user to manually modify the association between a public identity (e.g. phone number) and a specific private identity corresponding to a single customer device not provided with a UICC.;nonsec
The CPN (CND and/or CNG) shall support a method to access a Self Configuration Server.;nonsec

## Sheet: ePurse
Successful authentication is a prerequisite for the processing of any on-line or offline CEPS transaction;sec
On-line authentication must take place between the card issuer and the CEP card for load	unload	and currency exchange transactions;sec
The card issuer and the CEP card share a secret key to generate and verify MACs;sec
Off-line authentication must take place between a PSAM in the POS device and the CEP card for purchase and cancel last purchase transactions;sec
The card and the PSAM must use a public key algorithm for mutual authentication and session key exchange	as no permanent shared secret key may exist between the CEP card and the PSAM;sec
To load value into a slot of the CEP card securely	the load device establishes a connection between the issuer and the CEP card;sec
The card should use a unique diversified secret key	personalized into the card	to generate and authenticate transaction signatures;sec
If this is not a cash load	the funds issuer needs to verify that the funds are requested by the legitimate account owner	which is normally done by the presentation of an enciphered PIN;sec
The card issuer needs to ensure that the load acquirer is guaranteeing payment for the electronic value	and that the card is authentic;sec
The load acquirer needs to ensure that the issuer is the true owner of the card	and	in the case of an apparent failure of the load	the load acquirer needs the card presented to authenticate the failure;sec
The load device sends S1 in an authorization request to the issuer;sec
The load device also provides for verification of the identity of the cardholder (with either on-line or off-line PIN verification) and forwards verification data in the authorization request;sec
The issuer validates S1 to authenticate the card and the data to be used in the transaction;sec
The issuer sends S2 to the load acquirer in the authorization response message;sec
Unloads are permitted only to an account controlled by the card issuer and are performed only at a load device under the control of the card issuer;sec
The cardholder must have an account relationship with the card issuer	and funds removed from the card are credited to the cardholder account only after the card issuer authenticates the card;sec
The issuer needs only to authenticate the card	and the card needs only to authenticate the issuer and that the data is the same as used by the issuer;sec
The card generates S1	using data from the card and load device	and sends S1 to the card issuer to authenticate the card and the data that is to be used in the transaction;sec
The card issuer generates S2	which is sent to the card to allow the card to validate the card issuerÉ??s authenticity and to ensure that the data used by the card in the transaction is the same as the card issuer intended;sec
In the case of an unsuccessful completion	exception processing outlined in the On-line Exception Processing section is performed;nonsec
During a purchase transaction	the CEP card must ensure that it is dealing with an authentic POS device	and it must generate a signature to allow the card issuer to verify the integrity of the transaction;sec
The POS device must ensure that it is dealing with an authentic card	and guarantee integrity of transactions and batches to the merchant acquirer;sec
In the case of a reversal	the CEP card must re-authenticate the PSAM;sec
The card must ensure that the transaction is performed by the same POS device as was used for the purchase being canceled	and that the amount of the cancellation is the same as the amount of the purchase	or	in the case of an incremental purchase	the same as the amount of the last step;sec
During a Cancel Last Purchase transaction	the CEP card is authenticated by the PSAM in the POS device;sec
The PSAM authenticates that the purchase transaction being canceled was performed by the PSAM	and that the transaction being canceled is part of the active batch;sec
The card issuer and the merchant acquirer also authenticate the transaction when they receive it;sec
Transmissions between host systems should be protected by MACs based on unique keys that are shared by the nodes involved;sec
The transaction signatures ensure end to end integrity of transmitted data for load	unload	and currency exchange transactions;sec
These totals are used by the merchant acquirer to ensure the integrity of the batch;sec
The count and amount of the transactions in the batch must be protected by the S4 MAC	This information is not part of the card issuerÉ??s verification process;sec
Scheme providers must assign unique identifying numbers to merchant acquirers who provide PSAMs;sec
These merchant acquirers must then assign unique identifiers to PSAMs;sec
Each PSAM must maintain a transaction count	The unique PSAM ID and the transaction count are used during a conversation with a CEP card. The transaction count must not be reset during the life of the PSAM;sec
Contain the CA public RSA key	the PSAMÉ??s private RSA key and optionally the certificates that the POS device uses to perform mutual authentication with the CEP card;sec
Perform the calculation required to generate a signature using the PSAMÉ??s private RSA key	to allow the CEP card to validate the PSAM;sec
Contain the latest transaction count and amount of batches that have not been deleted from the POS device by the merchant or merchant acquirer;nonsec
Contain the details of a transaction between the initialize command for that transaction and the initialize command for the next transaction;nonsec
Be the entity that maintains control over the flow of a transaction	ensuring that all security is enforced;sec
Perform the verification of signatures and certificates during a purchase and cancel last purchase transaction;sec
Ensure that each batch of transactions is cleared and settled once and only once;nonsec
Send transactions to card issuers or their processors in a standard format defined in agreement with the scheme provider;nonsec
Ensure that CA public keys	aggregation parameters	blocking lists and issuer certificate revocation lists from the scheme providers are sent to the POS devices;sec
Share one or more MAC keys with connecting processors	create a MAC on each transmission sent to another processor	and verify the MAC on each transmission received from another processor;sec
Send transactions to other processors in a standard format defined in agreement with the scheme provider;nonsec
If a supported scheme provider has a dispute resolution process	participate in that dispute resolution process with connecting processors to resolve any issues related to invalid transactions. These resolution processes should include a mechanism for repayment of funds associated with invalid transactions;nonsec
The scheme provider must ensure that the entire process between merchants	merchant acquirers	card issuers	and processors is auditable and reconcilable;sec
If errors in the card issuer MAC are discovered by the card issuer during its processing of the transactions	a dispute mechanism	established by the scheme provider	may be used to have money refunded;sec
If a scheme provider establishes a central error repository	all transactions for the scheme with MAC errors must be sent to that central error repository whether or not they are submitted to the dispute process;sec
Payment for a transaction is only required when a detail transaction is submitted for payment	A merchant acquirer may choose to pay the merchant using the batch total;nonsec
The timing of payment to the merchant must be established between the merchant and the merchant acquirer;nonsec
A purchase transaction may be reversed	prior to the removal of the CEP card from the POS device	by sending a purchase reversal command to the CEP card	The CEP card must authenticate the PSAM using certificates previously exchanged;sec
The amount to be reversed is the amount of the last step of the transaction. The reversal command sent to the CEP card contains a S2 MAC computed by the PSAM;sec
The PSAM in the POS device generates a merchant acquirer S5 MAC for the transaction	computes a new S4 MAC on the updated batch total count and amount	and logs the transaction;sec
The CEP card authenticates the PSAM using the certificates previously received and the S2	The CEP card increments the value of the purse and logs the transaction;sec
The CEP card sends a response to the reversal command to the POS device. The reversal is considered to be successful even in the event of a negative response or no response from the CEP card;nonsec
After the CEP card is inserted in the POS device	the POS device initiates the cancel last purchase transaction;nonsec
If the POS device supports multiple applications or multiple transaction types	an interaction between the terminal and consumer or sales agent determines the CEP application and the function to be performed (cancel last purchase transaction);nonsec
The CEP card verifies that the PSAM is the PSAM used in the original transaction	computes a S1 MAC using the same DES session key that was used for the purchase transaction being cancelled	and responds to the POS device with the S1 and the identification of the last transaction. If the purchase transaction to be canceled has been canceled or is not part of the active batch	the command is not allowed;sec
The PSAM either retrieves or re-derives the DES session key used for the purchase transaction being cancelled. The POS device authenticates the CEP card using this key and the S1 MAC;sec
The PSAM in the POS device generates a merchant acquirer S5 MAC for the transaction and a new S4 MAC for the batch total count and amount and logs the transaction. The amount of the canceled last purchase transaction is subtracted from the header amount. The transaction is kept in a data store associated with the POS device until the merchant acquirer collects it;sec
A credit command	which contains the S2 MAC computed by the PSAM using the session key	is sent to the CEP card;sec
The CEP card authenticates the terminal using the S2 MAC and the session key from the purchase transaction being cancelled. The CEP card increments the value of the purse and logs the transaction. The CEP card verifies that the cancellation amount is equal to the amount of the last step of the purchase transaction;sec
A transaction collection process must exist. Data being transmitted from the POS devices must be transmitted in a manner that ensures integrity of the data;sec
The batch is sent to the merchant acquirer. Delivery may involve transmission to multiple intermediate locations or it may be direct to the merchant acquirer;nonsec
The merchant acquirer validates the batch to ensure that it has been transmitted correctly and enters it into the log;nonsec
If the business rules allow this transaction is to be aggregated	the PSAM must determine if it has an aggregation record for the card issuer. If the PSAM does not have an aggregation record for the card issuer	a new aggregation record for the card issuer must be created;nonsec
The aggregated totals by card issuer must be transmitted to the merchant acquirer at the same time and manner as the non-aggregated detail transactions in the batch;nonsec
Each POS transaction completed at the POS device is given a S5 MAC by the PSAM	which is used by the merchant acquirer to validate that the transactions were made at a POS device with a valid PSAM. The batch total count and amount must be protected by the S4 MAC	which must also be validated by the merchant acquirer;sec
The merchant acquirer validates the PSAMÉ??s MACs prior to accepting the POS transactions for payment. In addition	selected data elements are validated to ensure correct processing by the POS device and its PSAM;sec
Each purchase transaction is signed by the CEP card with a S6 MAC	which is used by the card issuer to validate that the transaction was made with a legitimate	not counterfeit	CEP card. The card issuer validates the CEP cardÉ??s MAC;sec
Payment decisions are based on signature validations	scheme provider rules	and merchant and merchant acquirer agreements;sec
After investigation	if the merchant acquirer decides	based on scheme rules	to accept the transactions	a method must exist to settle them and forward them to the card issuer;nonsec
A transaction that passes merchant acquirer validations and is forwarded to the card issuer is paid for by the card issuer. If the transaction does not pass card issuer validations	the card issuer may follow the scheme providerÉ??s dispute procedures;nonsec
Pay on detail is the default payment arrangement for merchant acquirers to provide payment to their merchants. In this arrangement	the merchant acquirer relies on the POS transaction S5 MAC to determine acceptance. Merchants are paid only for valid POS transactions;sec
POS transactions that were rejected for payment by the merchant acquirer are flagged with an error code indicating the type of validation failure and are forwarded to the card issuer for CEP card history information only;nonsec
All load transactions are on-line transactions. Authorization of funds for load transactions must require a form of cardholder verification. The load device must support on-line encrypted PIN or off-line PIN verification;sec
Off-line PIN verification must include both encrypted and unencrypted PIN;sec
The card verification method indicator (CVMI) in the CEP card must specify support of online PIN verification and at least one method of off-line PIN verification (encrypted or unencrypted);sec
Since these transactions are on-line to the issuer	the issuer has the opportunity to lock the card or the application. These transactions are not available to a card that has already been locked;sec
Card issuers must inform their cardholders as to which currencies they support in electronic purses;nonsec
Load acquirers must determine the currencies that they must support for load transaction;nonsec
The CEP application must contain data that indicates the presence of a linked financial institution. If a linked financial institution is established for the CEP application	then linked loads must be allowed and data in the application must indicate whether linked loads are supported;nonsec
Flexibility is required to accommodate the variety of environments where unlinked loads may be implemented. As a result	the design specification must not preclude dual-leg transactions** from taking place either sequentially or in parallel. The design of a given implementation will vary depending on the device	host	and network capabilities;nonsec
Unload and currency exchange transactions are optional for CEP card issuers. The CEP card must indicate whether the card issuer supports these transactions. However	if a card issuer issues multi-currency capable cards	it must provide its cardholder with a facility to remove any remaining value. As a result	if a card issuer supports loading of multiple currencies onto a card	then it must support the unload or currency exchange transaction or both;nonsec
The card issuer must establish its policies for assigning and adjusting slot maximum balances. These policies may require the card issuer to maintain a card database;nonsec
Currency exchange rate fluctuations may increase the card issuers liability. The card issuer must be able to adjust maximum balances to bring them in line with their policies. The card issuer may update the maximum balances as part of a load	a partial unload	and a currency exchange transaction. On a currency exchange transaction	only the É??toÉ?ù currency maximum balance may be updated;nonsec
A CEP card may contain currencies that the load acquirer does not support. As a result	load devices must use the alphabetic issuer-supplied currency code and currency exponent from the CEP slot(s) to display the source amounts for the currency conversion transaction;nonsec
Card issuers must provide an alphabetic currency code in each message that establishes a new currency. This alphabetic currency code and the currency exponent will be used by the load device to display currency balances. This allows the cardholder to identify the currency being displayed;nonsec
Script messages that conform to EMV specifications may be included as part of load	unload and currency exchange messages from the card issuer to the CEP card. An update key must be used when card parameters are changed. Script messages may be sent to the CEP card either before or after the credit for load	debit of unload and currency exchange commands;nonsec
All on-line messages must have the ability to include card issuer discretionary data from the CEP card;nonsec
The card issuer must notify the cardholder if the assessment of service fees by the card issuer during the currency exchange transaction may result in a balance of zero after the transaction has completed;nonsec
The card issuer must have the ability to deactivate a CEP application in the response to a load or currency exchange transaction;nonsec
The CEP card may support multiple currencies. Each currency occupies a É??slotÉ?ù within the CEP. The slots are defined by the currency supported. The currency for an individual slot is determined during load or currency exchange. Currency exchange could apply to a single slot	and then only for the total balance;nonsec
It is a card issuerÉ??s decision to determine the currencies that are allowed to occupy slots in the CEP card. This decision is made by the card issuer during the load or currency exchange transaction	by approving or rejecting the request to authorize the transaction;nonsec
A single currency cannot occupy more than one slot. The CEP card must not permit a slot to be assigned a currency if another slot in the CEP card has already been assigned to that currency;nonsec
The CEP card limits each slot to a maximum balance. The maximum balance for a slot is established when a currency is assigned to the slot	and is determined externally by the card issuer or by CEP card data which indicates a maximum balance in a reference currency. There is no requirement that all slot maximums have the same relative value	and there is no requirement for the card to maintain a maximum total value;nonsec
Only one version of the CA public key is required in the card. This requires that the PSAMs with which the CEP card exchanges cryptograms must be capable of generating and validating cryptograms using the relevant keys from all current cards;sec
Two-way	or mutual	authentication	where the card authenticates the terminal and the terminal authenticates the card for each transaction	must be performed for off-line transactions;sec
For increased security and convenience	asymmetric cryptography must be used as the authentication security for off-line transactions;sec
The card must authenticate the terminal at the point of sale	ensuring that it is genuine and valid	and use a two-way authentication process;sec
The terminal must authenticate the card and the transaction at the point of sale	ensuring that they are genuine and valid;sec
The terminal must participate in a two-way authentication process with the card;sec
For cancel last purchase transactions	the terminal must validate the card and sign the cancellation;sec
The terminal must secure transactions by retaining the cardÉ??s symmetric MACing key signature as part of the transaction;sec
The terminal must generate a symmetric MACing key signature and send it to the merchant acquirer;sec
Incremental purchase transactions must use two-way authentication for the initial session authentication	and at least one-way	with the terminal authenticating the card	for the remaining increments or some of the remaining increments;sec
Load and unload functions must be authenticated using end-to-end security between the card and the card issuer;sec
The issuer host must authenticate the card upon the load/unload request;sec
The card must authenticate the issuer host upon the response to the request;sec
A proof must be sent to the load acquirer that a load or unload occurred to avoid repudiation;sec
The management of keys must be accomplished in a secure	certified environment;sec
There may be multiple certification authorities that manage keys for the system	including the possibility of one overall highest level certification authority (perhaps on an international level)	and domestic certification authorities for each country or region;sec
The system must protect the integrity of key transaction data including transaction identification	currency code and amount. If tampering is suspected	the system must cause the transaction to fail;sec
Expired cards must not be used for loading electronic value;nonsec
The time period during which a cardholder can unload electronic value	perform a purchase or a currency exchange from an expired card may be determined by each issuer;nonsec
Consumers must be able to load electronic value to their cards at any participating load device	regardless of the location	provided that the currency that is requested is supported by the acquirer and the card issuer;nonsec
Funds issuers must accept funds authorization requests	regardless of the load currency type	as permitted;sec
Load devices that are available to the general public should support multiple sources of funding and support both linked and unlinked loads;nonsec
Authorizations for load transactions require a form of cardholder authentication for funds requests;sec
The load device must support on-line PIN encryption or off-line PIN verification;sec
The load device which supports only off-line PIN verification must support both the off-line PIN encryption method and the off-line PIN plain text verification method as defined in EMV;sec
Unload transactions do not require cardholder authentication. (However	an acquirerÉ??s devices may be configured such that authentication is required for access.);sec
The architecture for the electronic purse should not preclude the eventual deployment of a variety of devices to meet the needs of many card acceptance environments. Unload must not be precluded from being supported on any or all of these devices at the option of the acquirer;nonsec

## Sheet: GPS
All applications under the GlobalPlatform shall be implemented in a hardware-neutral secure runtime environment ;sec
The run time environment shall be responsible to separate secure storage for the application code and data ;sec
The run time environment shall responsible to establish communication services between card and off-card entities;nonsec
Security domain shall ensure complete seperation of keys among the card issuers and other application providers;sec
"Security Domains shall support security services such as key handling, encryption, decryption, digital signature generation and verification for their providers' such as card issuer, applicaiton providers and controlling authority";sec
The GlobalPlatform Environment(OPEN) shall responsible for to provide an API to applications	command dispatch	Application selection	(optional) logical channel management	and Card Content management;nonsec
The OPEN shall responsible to load application code	card content and memory management ;nonsec
The OPEN shall responsible to enforce security principles defined for Card Content management.;sec
The OPEN shall own the GlobalPlatform register that contains information for managing the card	Executable Load Files	Applications	Security Domain associations	and privileges.;nonsec
The GlobalPlatform API shall provides services to the application such as card verification and security services ;sec
The GlobalPlatform API shall provides services to the card content management such as card locking and application life cycle state update ;nonsec
The primary goal of the GlobalPlatform is to ensure the security and integrity of the card's components for the life of the card. These components are The runtime environment	The OPEN	The Issuer Security Domain	Supplementary Security Domains	The Applications.;sec
To ensure card security and integrity	the GlobalPlatform is designed to support a range of secure mechanisms for: Data integrity	Resource availability	Confidentiality	Authentication.;sec
The Card Issuer is responsible for Generating and loading the Issuer Security Domain keys	;sec
"The Card Issuer is responsible for Enforcing standards and policies for Application Providers governing all aspects of Applications to be provided to the Card Issuer or operated on the Card Issuer's cards,";sec
"The Card Issuer is responsible for Working with Application Providers to create and initialize Security Domains other than the Issuer Security Domain,";nonsec
"The Card Issuer is responsible for Determining policy with regards to card and Application Life Cycle management, velocity checking levels, privileges, and other security parameters,";nonsec
The Card Issuer is responsible for Managing the application code loading and installing both on a Pre-Issuance and Post-Issuance basis;nonsec
The Card Issuer is responsible for Cryptographically authorizing load	install	and extradition to be performed by Application Providers.;sec
"The Application Provider is responsible for Generating the keys for its own Security Domains or obtaining Security Domain keys from a trusted third party,";sec
The Application Provider is responsible for Working with the Card Issuer to load generated keys into the Application Provider's Security Domain	;sec
The Application Provider is responsible for Providing applications that meet the Card Issuer's security standards and policies	;nonsec
"The Application Provider is responsible for Providing load file data block signatures according to its own security policy for integrity and source authenticity,";sec
The Application Provider is responsible for Obtaining pre-authorization for load	install	and extradition from the Card Issuer	;nonsec
The Application Provider is responsible for Returning receipts for load	install	delete	and extradition	according to the Card Issuer's policy.;nonsec
"A Controlling Authority is responsible for Generating the keys for its own Security Domain or obtaining Security Domain keys from a trusted third party,";sec
A Controlling Authority is responsible for Working with the Card Issuer to load generated keys into the Controlling Authority's Security Domain	;sec
"A Controlling Authority is responsible for Providing load file data block signatures according to its own security policy for integrity and source authenticity.";sec
"The runtime environment is responsible for Providing an interface to all Applications that ensures that the runtime environment security mechanisms cannot be bypassed, deactivated, corrupted or otherwise circumvented,";sec
The runtime environment is responsible for Performing secure memory management;sec
"Secure memory management shall ensure that Each application's code and data (including transient session data) as well as the runtime environment itself and its data (including transient session data) is protected from unauthorized access from within the card,";sec
"Secure memory management shall ensure that When more than one logical channel is supported, each concurrently selected Application's code and data (including transient session data) as well as the runtime environment itself and its data (including transient session data) is protected from unauthorized access from within the card,";sec
Secure memory management shall ensure that The previous contents of the memory is not accessible when that memory is reused	;sec
"Secure memory management shall ensure that The memory recovery process is secure and consistent in case of a loss of power or withdrawal of the card from the card reader while an operation is in progress,";sec
"The runtime environment is responsible for Providing communication services with off-card entities that ensures the proper transmission (according to the specific communication protocol rules) of unaltered command and response messages.";sec
Each Trusted Framework present on the card shall Check the application access rules of the inter-acting Applications according to their respective privileges	;sec
"Each Trusted Framework present on the card shall Enforce the Trusted Framework security rules for inter-application communication, including the rules, defined in appendix G,";sec
Each Trusted Framework present on the card shall Ensure that incoming messages are properly routed unaltered to their intended destinations	;sec
"Each Trusted Framework present on the card shall Ensure that any response messages are properly returned unaltered (except for any cryptographic protection) to the original receiver of the incoming message.";sec
"The OPEN shall Provide an interface to all Applications that ensures that the GlobalPlatform security mechanism cannot be bypassed, deactivated, corrupted or otherwise circumvented,";sec
The OPEN shall Check application access rules according to the Applications' privileges	;sec
The OPEN shall Manage card and Application Life Cycle;nonsec
The OPEN shall Ensure that the Card Content changes are authorized by the Card Issuer	;sec
The OPEN shall Ensure that application code has been signed by the Controlling Authority represented on the card	;sec
The OPEN shall Ensure that application code has been signed by Application Providers represented on the card	if required.;sec
Security Domains enforce the security policies of their off-card Security Domain Provider.;sec
"When applicable a Security Domain shall Communicate with off-card entities in accordance with its Security Domain Provider's security policy in Pre-Issuance and Post-Issuance,";sec
When applicable a Security Domain shall Manage on-card data securely	;sec
"When applicable a Security Domain shall Provide cryptographic protection services for its own Applications during their personalization and optionally during their subsequent operation,";sec
When applicable a Security Domain shall Request the OPEN to load	install	extradite	and delete card content	;nonsec
When applicable a Security Domain shall Return to the off-card entity any receipt for load	install	extradition	and delete	;nonsec
When applicable a Security Domain shall Verify the authorization for Card Content changes initiated by an off-card authority	;sec
When applicable a Security Domain shall Generate receipts for load	install	extradition	and delete	;nonsec
When applicable a Security Domain shall Verify the load file data block signature when requested by the OPEN.;sec
A Global Services Application shall Be able to provide services to other Applications	such as CVM services	;nonsec
A Global Services Application shall Hold the Global Services application-related data securely	;sec
A Global Services Application shall Perform internal security measures as required by the service.;sec
Applications should Expose only data and resources that are necessary for proper application functionality;sec
Applications should Perform internal security measures required by the Application Provider;sec
The back-end systems (multiple back-end systems may exist for a single card)	which communicate with the cards	perform the verifications	and manage the off-card key databases	also shall be trusted.;sec
"One of the major requirements for a GlobalPlatform card is the ability to provide a minimum level of cryptographic functionality. This cryptography is, for example, used for the generation of signatures, and is available for use by the Applications present on the card.";sec
The Issuer Security Domain shall implement one Secure Channel Protocol.;sec
A Security Domain other than the Issuer Security Domain shall implement [at least] one Secure Channel Protocol.;sec
A GlobalPlatform card should support symmetric cryptography such as the Data Encryption Standard (DES) algorithm.;sec
A GlobalPlatform card may also support asymmetric cryptography such as the Rivest / Shamir / Adleman (RSA) algorithm.;sec
When present	services to encrypt and decrypt any pattern of data using these algorithms shall be available to Applications.;sec
"It is the responsibility of the Card Issuer or the Controlling Authority to set up the appropriate off-card procedures to comply with the governmental restrictions upon cryptography. Features to disable or restrict cryptography usage by Applications on a card are beyond the scope of this Specification.";sec
The Load File Data Block Hash is intended to verify the integrity of a complete Load File Data Block when loaded to a GlobalPlatform card.;sec
The Load File Data Block Hash is used in the computation of The Load File Data Block Signature;sec
The Load File Data Block Hash is used in the computation of The Load Token;nonsec
When present during the loading of a Load File to the card	each signature shall be verified by the appropriate Security Domain.;sec
Tokens shall be verified by the appropriate Security Domain.;sec
The appropriate Security Domain may generate Receipts during Delegated Management.;nonsec
A GlobalPlatform card may provide security services related to information exchanged between the card and an offcard entity.;nonsec
The security level of the communication with an off-card entity does not necessarily apply to each individual message being transmitted but can only apply to the environment and/or context in which messages are transmitted.;nonsec
The concept of the Life Cycle of the card (see section 5.1 - Card Life Cycle) may be used to determine the security level of the communication between the card and an off-card entity.;nonsec
A GlobalPlatform card offers Entity authentication - in which the card or the off-card entity proves its authenticity to the other entity through a cryptographic exchange	;sec
A GlobalPlatform card offers Integrity and authentication - in which the receiving entity (the card or off-card entity) ensures that the data being received from the sending entity (respectively the off-card entity or card) actually came from an authenticated entity in the correct sequence and has not been altered	;sec
A GlobalPlatform card offers Confidentiality - in which data being transmitted from the sending entity (the off-card entity or card) to the receiving entity (respectively the card or off-card entity) is not viewable by an unauthenticated entity.;sec
The life cycle models is responsible to functionality and security of Card	Executable Load Files	Executable Modules	Security Domains	and Applications.;sec
The OPEN shall owns and maintains the Life Cycle information within the GlobalPlatform Registry ;nonsec
The OPEN shall be responsible to maintain security and administration of the card and its content;sec
At OP_READY state	the OPEN shall be available and ready for execution ;nonsec
At OP_READY state	the runtime environment shall be ready for execution ;nonsec
At OP_READY state	issuer security domain shall be implicitly selected application for all card interfaces;nonsec
At OP_READY state	Executable Load Files that were included in Immutable Persistent Memory shall be registered in the GlobalPlatform Registry;nonsec
At OP_READY	initial key shall be available within the issuer security domain;nonsec
The off-card entity under the OP_READY state may insert Security Domain keys in order to maintain a cryptographic key separation from the Issuer Security Domain keys;sec
The SECURED state may be used to enforce the relevant security policies of the security domain and applications;sec
The off-card entity under the SECURE state shall be used to ensure the availability of all keys by the issuer security domain;sec
The CARD_LOCKED state shall has the ability to disable the selected security domain and application;nonsec
The card under CARD_LOCKED state shall only allow the application to select the final application privilege;nonsec
The Card Content changes including any type of data management (specifically Security Domain keys and data) shall not allowed in the CARD_LOCKED state.;nonsec
The state TERMINATED shall be used to permanently disable all card functionality with respect to any card content management and any life cycle changes.;nonsec
The GlobalPlatform Environment (OPEN) supports Command Dispatch functions (Application and Security Domain selection	(Optional) Logical channel management	Command dispatching) if the underlying runtime environment does not support them:;nonsec
The GlobalPlatform Environment (OPEN) supports Card Content Management functions (Content verification	Content loading	Content installation	Content removal	Access control rules for card content management) if the underlying runtime environment does not support them:;nonsec
The GlobalPlatform Environment (OPEN) supports Security Management functions (Security Domain locking and unlocking	Application locking and unlocking	Card locking and unlocking	Card termination	Privilege usage	Security Domain	privilege usage	Tracing and event logging) if the underlying runtime environment does not support them:;nonsec
The GlobalPlatform Environment (OPEN) supports GlobalPlatform Trusted Framework functions (Secure inter-application communication) if the underlying runtime environment does not support them:;nonsec
The GlobalPlatform Registry is a data store required to support the various system functions of the GlobalPlatform.;nonsec
Applications and Security Domains may access andor modify some content known or managed by the OPEN.;nonsec
Depending on the relevant privileges of the requesting entity	the following services shall be provided by the OPEN Retrieving the Applications own Life Cycle State stored by the OPEN in the GlobalPlatform Registry	Retrieving the card Life Cycle State	Obtaining access to the services of the Security Domain associated with the Application	Transitioning the card Life Cycle State to CARD_LOCKED	For contact cards according to ISOIEC 78164 and for contactless cards Type A according to ISOIEC 144433	setting the content of the historical bytes	Transitioning the Applications own Application Life Cycle State stored by the OPEN in the GlobalPlatform Registry	Transitioning the card Life Cycle State to TERMINATED	Obtaining access to GlobalPlatform Registry information	Obtaining access to Global Services Applications.;xyz
The commands received by a GlobalPlatform card shall be processed by the OPEN or dispatched to the selected Application for processing.;nonsec
The SELECT [by name] command is processed by the OPEN.;nonsec
If the card is aware of logical channels but only supports the Basic Logical Channel	the OPEN shall respond with the appropriate error	;nonsec
If the card is aware of logical channels and supports at least one Supplementary Logical Channel	the OPEN shall process the command	;nonsec
If the card only supports the Basic Logical Channel and has no concept of logical channel support	the command shall be dispatched to the selected Application for processing.;nonsec
Any other type of command received shall be dispatched to the currently selected Application.;nonsec
"Commands are either received on the Basic Logical Channel (logical channel number zero) or on a Supplementary Logical Channel (logical channel number other than zero). In compliance with ISO/IEC 7816-4, logical channel information shall be indicated in the class byte of the APDU command header.";nonsec
"For all commands, if the command indicates a Supplementary Logical Channel that is not opened then: If the card only supports the Basic Logical Channel and has no concept of logical channel support, the command shall be dispatched to the selected Application for processing. If the card is aware of logical channels, the OPEN shall respond with the appropriate error. (This requirement may exclude …
For commands that are dispatched to an Application	it is the responsibility of the Application to correctly reject commands that it does not recognize	expect or cannot process.;nonsec
The Issuer Security Domain shall have no multi-selection restrictions on cards that support multiple logical channels i.e. it shall be capable of being selected across multiple logical channels.;nonsec
The Issuer Security Domain is by default the implicitly selectable Application on all logical channels of all card I/O interfaces supported by the card. Implicit selection on a specific logical channel of a specific card I/O interface may be assigned only if the Issuer Security Domain is the implicitly selectable Application on that logical channel of that card I/O interface and no other Locked A…
An Application installed or made selectable with a specific Implicit Selection parameter is registered in the GlobalPlatform Registry as the implicitly selectable Application on the logical channel(s) of the card I/O interface(s) indicated in the parameter if no other Application (other than the Issuer Security Domain) is already registered as implicitly selectable on that logical channel(s) of t…	;nonsec
An Application installed or made selectable with the Card Reset privilege and no Implicit Selection parameter is registered in the GlobalPlatform Registry as the implicitly selectable Application on the Basic Logical Channel for all card I/O interfaces supported by the card if no other Application (other than the Issuer Security Domain) is already registered as implicitly selectable on the Basic …	;nonsec
If an Application implicitly selectable on specific logical channel(s) of specific card I/O interface(s) is deleted	the Issuer Security Domain becomes the implicitly selectable Application on that logical channel(s) of that card I/O interface(s).;nonsec
"The OPEN shall use the implicit selection registration of each Application for controlling the following runtime behavioral requirements: Identifying the Application which is implicitly selectable on the Basic Logical Channel of the current card I/O interface during the card reset or activation sequence, Identifying the Application which is implicitly selectable when opening on the current card …
The Basic Logical Channel is the permanently available interface to a GlobalPlatform card and shall be supported by the OPEN.;nonsec
The OPEN shall support Application selection on the Basic Logical Channel via Implicit Selection following the card reset (see ISO/IEC 7816-3 for contact cards) or activation sequence (see ISO/IEC 14443-3 for contactless cards)	;nonsec
The OPEN shall support Application selection on the Basic Logical Channel via Explicit Selection through the SELECT [by name] command.;nonsec
The OPEN may also support additional selection processes.;nonsec
Partial AID selection as defined in section 6.4.2.1.2 - Explicit Selection	shall be supported. (Partial AID selection does not require knowledge of the full AID by the off-card entity.);nonsec
As multiple Applications on the card may have the same partial AID	it is required that a method exists to select all Applications matching the partial AID.;nonsec
Once the card session has been established (for contact cards according to ISO/IEC 7816-4 after Answer-to-Reset	or after the activation sequence for contactless cards according to ISO/IEC 14443-3)	and before the first command is issued to the card	the Application defined as implicitly selectable on the Basic Logical Channel and for that card I/O interface shall become the selected Application on the Basic Logical Channel for that card I/O interface.;nonsec
If the card is in the Life Cycle State CARD_LOCKED or TERMINATED	the Application with the Final Application privilege is the selected Application on the Basic Logical Channel and the OPEN shall not attempt to identify the implicitly selectable Application;nonsec
In all other cases the OPEN shall search the GlobalPlatform Registry for an Application that is marked as implicitly selectable on the Basic Logical Channel for the current card I/O interface (e.g. contact or contactless)	and if this Application is not in the Life Cycle State LOCKED	it shall become the selected Application on the Basic Logical Channel. If this is an Application in the Life Cycle State LOCKED	the Application with the Final Application privilege shall become the selected Application on the Basic Logical Channel.;nonsec
At any time during a Card Session the OPEN may receive a request to select an Application on the Basic Logical Channel (SELECT [by name] [first or only occurrence] command). The OPEN shall determine if the requested AID matches or partially matches an entry within the GlobalPlatform Registry and whether this entry is selectable.;nonsec
At any time during a Card Session that has already contained a SELECT [by name] [first or only occurrence] command	the OPEN may receive a request to select a next Application (SELECT [by name] [next occurrence] command) on the Basic Logical Channel. The OPEN shall determine if the requested AID matches or partially matches another entry within the GlobalPlatform Registry and whether this entry is selectable.;nonsec
"For both the SELECT [by name] [first or only occurrence] command and the SELECT [by name] [next occurrence] command, an Application becomes the selected Application on the Basic Logical Channel if: The requested AID matches (fully or partially) the Applicationís AID, The Application being selected is in the correct Life Cycle State, The Application has no restrictions due to multi-selection, and…
"In the card Life Cycle State CARD_LOCKED: - If the Application being selected has the Final Application privilege, this Application is re-selected and a warning is returned to the off-card entity, - If any other Application is being selected, the Application with the Final Application privilege remains selected and an error is returned to the off- card entity,";nonsec
"If a SELECT [by name] [first or only occurrence] or SELECT [by name] [next occurrence] is received and the data field of the command message is not present, the Issuer Security Domain shall become the currently selected Application and the SELECT command is dispatched to the Issuer Security Domain,";nonsec
If a SELECT [by name] [first or only occurrence] is received	the search always begins from the start of the GlobalPlatform Registry	;nonsec
If a SELECT [by name] [next occurrence] is received	the search always begins from the entry following the currently selected Application on the Basic Logical Channel in the GlobalPlatform Registry	;nonsec
If a full or partial match is found and this Application is in the Life Cycle State INSTALLED	continue searching through the GlobalPlatform Registry for a subsequent full or partial match. If no subsequent full or partial match is found	the OPEN shall return the appropriate error to the off-card entity	;nonsec
If a full or partial match is found and this Application is in the Life Cycle State LOCKED	continue searching through the GlobalPlatform Registry for a subsequent full or partial match. In the eventuality that this locked Application is already currently selected on the Basic Logical Channel	the OPEN shall terminate this Application Session. If no subsequent full or partial match is found	the OPEN shall return the appropriate error to the off-card entity	;nonsec
If a full or partial match is found and this Application cannot be selected due to a multi-selection restriction or because the Application refuses selection (e.g. because it does not support the current card interface)	continue searching through the GlobalPlatform Registry for a subsequent full or partial match. If no subsequent full or partial match is found	the OPEN shall return the appropriate error to the off-card entity	;nonsec
If a full or partial match is found and this Application is selectable (i.e. in the correct Life Cycle State and has no multi-selection restrictions)	then it shall become the currently selected Application on the Basic Logical Channel and the SELECT [by name] command	whether [first or only occurrence] or [next occurrence]	shall be processed according to the requirements of the runtime environment (e.g. dispatched to the Application)	;nonsec
"If no full or partial match is found at all, the currently selected Application on the Basic Logical Channel shall remain the selected Application and - If the SELECT [by name] command has the [first or only occurrence] parameter set, the SELECT command is dispatched to the Application, - If the SELECT [by name] command has the [next occurrence] parameter set, the OPEN shall return the appropria…
In the eventuality that the current Application Session has been terminated and no subsequent full or partial match is found	the OPEN shall make an attempt to select the Application that is marked as implicitly selectable on the Basic Logical Channel for the current card interface.;nonsec
At any time during a Card Session the OPEN may receive a request on the Basic Logical Channel to either open or close a Supplementary Logical Channel.;nonsec
If the card only supports the Basic Logical Channel and has no concept of logical channel support	the MANAGE CHANNEL command is dispatched to the currently selected Application. In this case	when a Security Domain is the currently selected Application	the command shall be rejected.;nonsec
"On cards that support logical channels, if a MANAGE CHANNEL [open] is received: If an Application is designated as implicitly selectable on the new Supplementary Logical Channel for the current card interface, that Application is implicitly selected on the newly opened Supplementary Logical Channel and runtime behavior requirements apply, Otherwise the Application designated as implicitly select…
On cards that support logical channels	if a MANAGE CHANNEL [close] is received	terminate the Application Session currently selected on the Supplementary Logical Channel indicated by the command and then close that logical channel. The Basic Logical Channel can never be closed.;nonsec
If the card is in the Life Cycle State CARD_LOCKED or TERMINATED	return the appropriate error.;nonsec
If the number of logical channels supported by the OPEN is not sufficient to open a new Supplementary Logical Channel	return the appropriate error.;nonsec
"The OPEN shall search the GlobalPlatform Registry for the Application that supports the current card interface and that is marked as implicitly selectable on the new Supplementary Logical Channel (or failing that, on the Basic Logical Channel) and: - If this is an Application in the Life Cycle State LOCKED, the Application with the Final Application privilege shall become the selected Applicatio…
Once an Application becomes the selected Application on the Basic Logical Channel	the responsibility for subsequent command dispatching still rests with the OPEN.;nonsec
On cards that are aware of logical channels	the MANAGE CHANNEL commands are only processed by the OPEN and are not dispatched to an Application.;nonsec
All other commands (including the MANAGE CHANNEL commands on cards that are not aware of logical channels or SELECT commands not described in section 6.4.2.1.2 - Explicit Selection) are immediately dispatched to the Application currently selected on the Basic Logical Channel. The processing of the command by the Application is beyond the scope of this Specification.;nonsec
"The OPEN shall support Application selection on an available Supplementary Logical Channel via two processes: Implicit Selection following a successful MANAGE CHANNEL [open] command, Explicit Selection through the SELECT [by name] command.";nonsec
The OPEN may also support additional selection processes.;nonsec
Partial AID selection as defined in section 6.4.3.1.2 - Explicit Selection	shall be supported on Supplementary Logical Channels.;nonsec
At any time on an open Supplementary Logical Channel	the OPEN may receive a request to select an Application on this Supplementary Logical Channel (SELECT [by name] [first or only occurrence] command). The OPEN shall determine if the requested AID matches or partially matches an entry within the GlobalPlatform Registry and whether this entry is selectable.;nonsec
At any time on an open Supplementary Logical Channel that has already contained a SELECT [by name] [first or only occurrence] command since the Supplementary Logical Channel was last opened	the OPEN may receive a request to select a next Application (SELECT [by name] [next occurrence] command) on this Supplementary Logical Channel. The OPEN shall determine if the requested AID matches or partially matches another entry within the GlobalPlatform Registry and whether this entry is selectable.;nonsec
"For both the SELECT [by name] [first or only occurrence] command and the SELECT [by name] [next occurrence] command, an Application becomes the selected Application on the Supplementary Logical Channel if: The requested AID matches (fully or partially) the Applicationís AID, The Application being selected is in the correct Life Cycle State, The Application has no restrictions due to multi-select…
"If the card is in the Life Cycle State CARD_LOCKED or TERMINATED: - Close the Supplementary Logical Channel, if currently open, - Return the appropriate error,";nonsec
If a SELECT [by name] [first or only occurrence] or SELECT [by name] [next occurrence] is received and the data field of the command message is not present	the Issuer Security Domain shall become the currently selected Application and the SELECT command is dispatched to the Issuer Security Domain	;nonsec
If a SELECT [by name] [first or only occurrence] is received	the search always begins from the start of the GlobalPlatform Registry	;nonsec
If a SELECT [by name] [next occurrence] is received	the search always begins from the entry following the currently selected Application on this Supplementary Logical Channel in the GlobalPlatform Registry	;nonsec
If a full or partial match is found and this Application is in the Life Cycle State INSTALLED	continue searching through the GlobalPlatform Registry for a subsequent full or partial match. If no subsequent full or partial match is found	the OPEN shall return the appropriate error to the off-card entity	;nonsec
If a full or partial match is found and this Application is in the Life Cycle State LOCKED	continue searching through the GlobalPlatform Registry for a subsequent full or partial match. In the eventuality that this locked Application is already currently selected on the same Supplementary Logical Channel	the OPEN shall terminate this Application Session. If no subsequent full or partial match is found	the OPEN shall return the appropriate error to the off-card entity	;nonsec
"If a full or partial match is found and this Application cannot be selected due to a multi-selection restriction or because the Application refuses selection (e.g. because it does not support the current card interface), continue searching through the GlobalPlatform Registry for a subsequent full or partial match. If no subsequent full or partial match is found, the OPEN shall return the appropr…
If a full or partial match is found and this Application is selectable (i.e. in the correct Life Cycle State and has no multi-selection restrictions)	then it shall become the currently selected Application on this Supplementary Logical Channel and the SELECT [by name] command	whether [first or only occurrence] or [next occurrence]	shall be processed according to the requirements of the runtime environment (e.g. dispatched to the Application)	;nonsec
"If no full or partial match is found at all, the currently selected Application on the Supplementary Logical Channel shall remain the selected Application and - If the SELECT [by name] command has the [first or only occurrence] parameter set, the SELECT command is dispatched to the Application, - If the SELECT [by name] command has the [next occurrence] parameter set, the OPEN shall return the a…
"At any time on an open Supplementary Logical Channel the OPEN may receive a request to either open or close a Supplementary Logical Channel. If a MANAGE CHANNEL [open] is received and the Application selected on the original Supplementary Logical Channel has no multi-selection restrictions, this Application becomes the selected Application on the newly opened Supplementary Logical Channel. If a …
If the card is in the Life Cycle State CARD_LOCKED or TERMINATED	return the appropriate error	;nonsec
If the number of logical channels supported by the OPEN is not sufficient to open a new Supplementary Logical Channel	return the appropriate error	;nonsec
If the Application currently selected on the original Supplementary Logical Channel cannot be selected on the new Supplementary Logical Channel due to a multi-selection restriction	the new logical channel shall not be opened and the OPEN shall return the appropriate error	;nonsec
Otherwise	the Supplementary Logical Channel indicated by the command is opened and the Application currently selected on the original Supplementary Logical Channel shall become the selected Application on the newly opened Supplementary Logical Channel.;nonsec
Once an Application becomes the selected Application on a Supplementary Logical Channel	the responsibility for subsequent command dispatching still rests with the OPEN.;nonsec
The MANAGE CHANNEL commands are only processed by the OPEN and are not dispatched to an Application.;nonsec
All other commands (including SELECT commands not described in section 6.4.3.1.2 - Explicit Selection) are immediately dispatched to the Application currently selected on the Supplementary Logical Channel. The processing of the command by the Application is beyond the scope of this Specification.;nonsec
"The GlobalPlatform Registry is used to: Store card management information, Store relevant application management information (e.g., AID, associated Security Domain and Privileges), Support card resource management data, Store Application Life Cycle information, Store card Life Cycle information, Track any counters associated with logs.";nonsec
"The contents of the GlobalPlatform Registry may be updated in response to: An internal OPEN invoked action, An authorized Application invoked action.";nonsec
All Applications including all Security Domains	and all Executable Load Files	shall have an entry in the GlobalPlatform Registry.;nonsec
Each Executable Load File or Executable Module is associated with an AID that shall be unique on the card.;nonsec
An Application AID may be the same as that of an Executable Module but may not be the same as that of an Executable Load File or the same as another Application already present in the GlobalPlatform Registry.;nonsec
This AID may be specified in a SELECT command to select the Application. It is not possible to select Executable Load Files or Executable Modules.;nonsec
;

## Sheet: DOSSPRE
Project ID	Requirement	Class
4	'The system shall generate a report outlining what effect the malware has done during execution in an isolated environment. '	INT
10	'The system shall be able to generate and send periodic logs the parentís smartphone '	INT
13	'The system shall retain video logs that only have motion. '	INT
14	'The system shall enable the detected cryptojacking domain or application to be logged, along with the date and time of detection. '	INT
16	'The system shall keep logs for every operation made by the user for audit trailing commitments.'	INT
17	'The system shall make it easy to trace an individualís activities after a crime has taken place.'	INT
17	'The system shall access personally, identifiable information to allow investigators to be able to reconstruct a criminal event after it happens, thereby securing the evidence. '	INT
21	'The system should be able to produce an audit report summary to send to the user of the system. '	INT
21	'The system shall provide availability of the audit report to users '	INT
21	'The system shall allow log capture to be a background process making the auditorís job much easier. '	INT
21	'The system shall enable specific logs from the computers to be captured and faultlessly interfaced with the web-based application with the help of security mechanism including HMAC and PGP. '	INT
21	'The system shall ensure that the originator of the log files that are required, recognizing the data items and data structures that are necessary for exchange. '	INT
22	'The system shall show Logs investigator activity '	INT
25	'The system shall allow every history of scans to be recoverable in case of system interrupt'	INT
28	'The system shall provide audit trails when required. '	INT
33	'The system shall be able to log the IP address accordingly '	INT
37	'The system should be able to log all activities taking place on the system for audit trial purposes '	INT
37	'The system shall be able to allow logging of each user activity. '	INT
38	'The system shall be able to apply automatic recording of events and some incidents Security '	INT
47	'The system shall enable the administrator to log into the system and to upload the captured traffic data into the analysis system so as to be accessed by any other administrators available. '	INT
48	'The system shall be able to inspect SSL certificate. '	INT
54	'The system shall automatically acquire a forensic image of the compromised VM main memory upon detection of a severe intrusion. '	INT
58	'The system has got an audit or logging mechanism which enables the user to check and view if there were other malicious activities that have been happening when after they logged out of the system. '	INT
58	'The system shall be able to show a section which displays the last time a user logged in the system and a summary of the activities they did on the system upon logging in. '	INT
58	'The system implements a PDP scheme which allows the user to audit and check if the untrusted server or an adversary did not compromise the integrity of the uploaded data. '	INT
62	'The system shall allow Analysis of locations prevalent crime using crowd-sourced data and reports data. '	INT
63	'The system shall allow a user to check netstat and recent network connections to see if rogue node it a victim of pivoting and if so trace the attacking machine. '	INT
63	'The system shall allow a user to recover unique identifiers of the node which was used to generate the nodeís unique ID/fingerprint upon registration when the owner entered/joined the university with it '	INT
63	'The systemís listening for scanning is done while listening to the OS activities. '	INT
78	'The system shall notify the administrator of who accesses the system in case a data breach occurs. '	INT
79	'The system shall maintain audit logs '	INT
90	'The system shall be introduced in each representativeís mobile device to screen the gadgetís applications and record the activities performed by the gadget. '	INT
95	'The system shall show a panel for logs of the anomalies detected.'	INT
101	'The system shall maintain information on log in and log out for accountability. '	INT
103	'The system shall collect and analyse data that the child is typing and if it captures certain keywords or a continuous sequence of expletive, it should send an alert through text to the parent. '	INT
103	'The system shall generate and send periodic logs to the parentís smartphone. '	INT
103	'The system shall be able to generate periodic logs as well as collect and analyse data alerting parents whenever certain keywords are typed. '	INT
105	'The system shall have an analyser which will execute the Malware files to inspect the type '	INT
3	'The system shall be web based and therefore guarantees maximum availability of data to the cloud data owners'	AVA
4	'The application will be available as a standalone application which will be installed on usersí virtual machines and thus will not be affected by network availability, '	AVA
9	'The system shall allow high availability of the application whenever the user needs it so a recovery module will be set in case of loss of the mobile phone. '	AVA
9	'The system shall allow that if the mobile phone is not present, some authentications are done by the user to obtain access to the system'	AVA
10	'The system shall be up and running all the time since its checking or monitoring the childís behavior and prevent any media from being sent or received using Bluetooth '	AVA
15	'The system shall allow for operation at all times. '	AVA
15	'The system shall ensure that the downtime of internet will not affect its availability as any user can still be granted or denied access to the system. '	AVA
15	'The system shall circumvent the electricity power cuts challenges by the use of UPS (uninterrupted power supply). '	AVA
17	'The system shall provide access whenever the user needs to check publicly available records of an individual, they should be able to do so since social media details are always available '	AVA
19	'The system shall be able to function as desired all the time. '	AVA
19	'The proposed systemí logistics are easily accessed hence its availability is guaranteed when and as required. '	AVA
24	'The system should work all the time and provide a means to handle errors with little or no input from the user. '	AVA
25	'The service of the system must always be available whenever it is needed '	AVA
29	'The system guarantees reliability and availability because the tools used in developing the system (Apache Kafka and Apache Storm) allows the system to be resilient to failure and to be available all the time. '	AVA
31	'The systemís logistics are usually accessed hence its availability is guaranteed when and as required. '	AVA
35	'The system shall be able to notify the respected parties of the clinical incident even when there is a fault '	AVA
39	'The system should work all the time and provide a means to handle errors with little or no input from the user. '	AVA
39	'The system should be able to provide data for the current maximum number of tags presently two thousand for a period of thirty days in whatever format the user decides. '	AVA
42	'The system will deliver emails whenever there is internet connection to receive the emails with minimal downtimes '	AVA
42	'The system will operate round the clock '	AVA
47	'The system shall have high availability wherever it is needed. '	AVA
57	'The system shall be available to users all the time to ensure a 24/7 service delivery and give results in a short period of time. '	AVA
58	'The system is web based and therefore guarantees maximum availability of data to the cloud data owners. '	AVA
59	'The system will be using local Microsoft based certificates, thus the intention is to ensure availability of the certificate authority at all times.'	AVA
59	'To on the system, The system shall provide redundancy to avoid a single point of failure and reduce interruptions which will render the system unusable. '	AVA
62	'The system shall be available at all times, meaning the user can access it using a device application which addresses the user concern for how dependable the system is during normal operating times. '	AVA
62	'The system must be considered downtime impact on the business, transport unavailability and minimizing unavailability.'	AVA
64	'The framework ought to be accessible wherever it is required. At whatever point the clients needs to make a purchase'	AVA
69	'The system in terms of responsiveness is a real time system such that clients can easily access medical records of babyís at any given point in time. '	AVA
79	'The system shall be designed with ease of access in mind as the data may be needed in emergency situations. '	AVA
79	'The system shall have high availability in such a way that it remains accessible online even during maintenance. '	AVA
85	'The system shall that the information collected from the previous stage of life should be readily available in any stage and whenever it is required by the rightful user '	AVA
88	'The system shall be able to do random check on connection. '	AVA
90	'The systemís QoS shall guarantee its availability at 99.9% uptime.'	AVA
91	'The framework shall be accessible, wherever and whenever a client needs to make a purchase. '	AVA
93	'The system shall be available to secure the files from unauthorised users. '	AVA
95	'The system shall be developed to be available all the time. '	AVA
99	'The system shall ensure that the public key is left open and accessible to the public domain. '	AVA
103	'The system shall be up and running all the time as long as the smartphone is in use to monitor the childís activities. '	AVA
3	'The system shall allow the user to generate their ECC public and private keys. These keys are to be used for the encryption of the AES encryption key and also for PDP. '	CON
3	'The system shall allow secure uploaded files using AES algorithm with a 256-bit key. '	CON
3	'The system shall automatically encrypt the files that will be uploaded by the user for storage using a 256-bit encryption key. '	CON
9	'The system shall employ encryption technics at the database side and use HTTPS when accessing networked resources over the internet'	CON
14	'The system should preserve the userís privacy by not publishing the monitored network traffic, and not exposing the userís registered email address.'	CON
14	'The system should not violate laws by not infringing the privacy of sensitive user information and intellectual property rights. '	CON
18	'The system should be able to secure the messages by encrypting them. '	CON
18	'The system should keep history of the transactions in a secure database. '	CON
19	'The system shall be accessible to users via HTTPS web portal '	CON
19	'The system should be able to enforce privacy of data by encryption of data during transmission. '	CON
19	'The system shall ensure encryption of data during transmission. '	CON
20	'The system shall ensure that the login password is stored in encrypted format. '	CON
20	'The system shall provide storage of all important information in a secure database '	CON
20	'The system shall automatically store credential information in a central database '	CON
20	'The system shall use a secure path of sending all the useful credentials to the platform '	CON
20	'The system shall never display a userís password. It shall always be echoed with special characters representing typed characters. '	CON
21	'The system shall be able to use PGP to maintain security of the log files'	CON
21	'The system through pgp will incorporate both symmetric key and public key cryptography to ensure confidentiality of the log files during transmission. '	CON
21	'The system shall enable implementation of clear secure data exchange protocols and document the interfaces and the protocols being utilized. '	CON
28	'The system shall maintain full patient medical records in an encrypted format on a server. '	CON
28	'The system shall enforce encryption on all files, communication channels and backups. '	CON
29	'The system should ensure that there is maximum confidentiality and safety assurance on the information. '	CON
33	'The system ensure a secure storage of the user patterns so as to protect against compromise attackers. '	CON
34	'The system shall be able to hash passwords '	CON
34	'The system shall be able to encrypt communication '	CON
35	'The web application will be secured by hardening and protecting the servers and restricting access from the outside. '	CON
36	'Information relating to passwords must be confidential '	CON
41	'The system shall allow the user to encrypt/decrypt messages using AES algorithm '	CON
41	'The system shall allow the user to embed the encrypted message and retrieve encrypted message from the image using LBS technique '	CON
41	'The system must also allow users to communicate securely knowing that their confidential data is safe from eavesdroppers. '	CON
42	'The system shall be able to ensure the user passwords and data will be encrypted to ensure that user information is secured '	CON
49	'The system player shall be responsible for hashing the trimmed partsí names. '	CON
49	'The player will hide the trimmed files from any direct contact with user or attacker, thereby reliably depriving any illegal sharing of files. '	CON
53	'The system shall allow an author who desires to protect his/her work from unauthorized use, to upload an image to embed the invisible digital watermark whenever submitting a piece of art. '	CON
55	'The system shall have encrypt and decrypt modules in place to attain better and improved security, for containing privacy invasions in overall. '	CON
56	'The system shall be secured against environmental threats and this is one of its prime function. '	CON
58	'The system must generate a shared encryption key, upon registration. '	CON
58	'The system shall be able to allow the user to generate their ECC public and private keys. These keys are to be used for the encryption of the AES encryption key and also for PDP. '	CON
58	'The system shall be able to secure uploaded files using AES algorithm with a 256-bit key. The system shall automatically encrypt the files that will be uploaded by the user for storage using a 256-bit encryption key. '	CON
58	'The system enhances security through the use of more secure and efficient enciphering algorithms, that is Advanced encryption standard with a 256-bit key and Elliptic curve cryptography. '	CON
59	'The system will employ encryption at the database side and use HTTPS when accessing networked resources over the internet. '	CON
61	'The system shall allow the radiologist to, encrypt and upload the images to the cloud. '	CON
64	'The main system is centered around security on online transactions hence it is secure. '	CON
72	'The system shall create hashes of the passwords and store them upon signing up, once a user types password(s) in plain text format. '	CON
72	'The system shall provide a user with the option to encrypt and decrypt data. '	CON
76	'The system shall allow secure storage of client information. '	CON
79	'The system shall allow data input into the system to be encrypted before being sent to the database instance on our cloud server for storage. '	CON
79	'The system shall enable users to retrieve the data on demand including in cases of emergency where it should be retrieved and decrypted before it can be accessed by the medical practitioner. '	CON
79	'The system shall ensure that the system records shall be encrypted and stored in the cloud as cyphertext. '	CON
80	'The system shall guarantee the privacy of user data at all times. '	CON
83	'The system shall use symmetric key encryption AES and asymmetric encryption key on the browser/client side to secure confidentiality of information. '	CON
85	'The system shall ensure confidentiality of vital personal information collected at all the systemís controllers. '	CON
85	'The system shall ensure that personal information is not displayed to the public but is encoded in a QR code '	CON
86	'The system shall hash the passwords using HMAC '	CON
88	'The system shall encrypt and decrypt files over a wireless connection. '	CON
88	'The system shall encrypt files using AES algorithm.'	CON
90	'The system shall guarantee confidentiality through encryption of stored data with AES. '	CON
91	'The system shall provide mechanisms for the security of online transactions. '	CON
92	'The system server shall be able to encrypt video content before it is downloaded. '	CON
92	'The system shall enable the client to decrypt video content to a virtual file and parse the location to media players.'	CON
93	'The system shall encrypt and decrypt files using a wireless connection. '	CON
93	'The system shall offer confidentiality through encryption with AES. '	CON
94	'The system shall secure the network by SSL to encrypt sensitive data before it travels within a network and decrypt it when it arrives at an agent server. '	CON
99	'The system shall produce encrypted payload and the message signature. '	CON
99	'The system shall ensure that each private key has to be encrypted with a password to keep it secure. '	CON
100	'The system shall ensure that sensitive information of transaction details should be hashed in the database, in case of a data breach.'	CON
101	'The system shall enable encryption and decryption capabilities to protect files. '	CON
4	'The system shall be abstracted from the user and the application has no user interaction hence the chances of users breaking it are very limited'	INT
8	'The system shall be able to block internet connection to the computer doing port scanning.'	INT
10	'The system shall be able to filter harmful websites against URLsí of known harmful websites. Access to known harmful websites shall not be permitted.'	INT
14	'The system shall allow the cryptojacking application to be terminated unless the user explicitly selects to ignore the cryptojacking application. '	INT
29	'The system should be able to block traffic to and from the network that is identified to be potentially malicious.'	INT
30	'The system shall implement input validation to help in increasing fault tolerance and ultimately reliability. '	INT
31	'The system database storing keywords will be secured against SQL injection attacks to reduce false positives. '	INT
33	'The system shall be able to block any illegitimate detections so as to render efficiently utilise system resources. '	INT
34	'The system shall be able to validate input'	INT
35	'The system shall resist unofficial and unlawful usage even the action is by accident or intended. '	INT
36	'The system shall not be vulnerable to the security attacks '	INT
37	'The system shall put proper controls for user input validations and configuration management to resist software tempering '	INT
39	'The data provided by the system should be validated and verified were possible.'	INT
40	'The system shall not support reverse engineering of its source code '	INT
44	'The system should be able to identify and trap user input error '	INT
48	'The system shall be able to identify acceptable low false positive rates. '	INT
48	'The system will have a very low False Positive Rate so that it can correctly identify the false positive calls and differentiate them from the real vulnerability ones. '	INT
48	'The system will have a very low False Negative Rate which means it be able to detect an actual vulnerability when it exists. '	INT
49	'The systemís ability to produce a trimmed output will deprive an attacker (pirate) access to a single complete song file from any point onwards. '	INT
52	'The system will ensure that general users will only have access through the user interface. '	INT
53	'The system shall provide a section for verification in the sense that if an image is said to have a watermark it should be able to detect and display the watermark.'	INT
53	'The system shall in the event that a watermarked image is submitted twice or more by different authors, the administrator shall be able to verify the legitimate owner of the image to protect the owner copyrights. '	INT
54	'The system shall provide a secure channel of communication between the backend system and the web user interface. '	INT
56	'The system components are not going to be degraded by weather changes such as heat or humidity even the casing will be designed to suit the prevailing weather conditions. '	INT
56	'The system shall be fast in intrusion response, to help in stopping the intensity of the damage or mitigation of the risk. '	INT
57	'The system shall be safeguarded against deliberate and intrusive faults from internal and external sources as it has proper controls such as user input validations and anti-software tempering '	INT
58	'The system shall implement a combination of cryptographic algorithms that are secure and have proven to be unbreakable by the current technologies, hence using these algorithms collectively strengthens the security of the system. '	INT
60	'PlutoMail will offer spam protection at server level and eliminates the need to install and update antispam software on each desktop. '	INT
63	'The system shall allow a user to block internet to the computer doing port scanning. '	INT
63	'The software is a safety-critical one and is used to perform last line of defense protection against attacks, since defects in safety-critical software can lead to serious service disruption or server down time. '	INT
64	'The system shall allow anomalies to be curbed after detection. '	INT
72	'The system shall offer secured web application SQL and XSS scripting vulnerabilities scanner. '	INT
73	'The system shall be self-protective and failure proof, exception handling will ensure that the system is fail safe and gracefully stops under error conditions.'	INT
81	'The system shall generate decoy files to supply to an intruder whenever a suspicious download is detected.'	INT
85	'The system shall blacklist any user that has done identity theft. '	INT
88	'The system shall allow automatic locking after connection is lost.'	INT
89	'The system shall be able to filter outgoing traffic if it contains proxy related request. '	INT
89	'The system shall be able to filter incoming traffic if it is from a proxy server. '	INT
89	'The system shall be able to deny websites listed in the database. '	INT
93	'The system shall lock automatically after the connection is lost. '	INT
95	'The system shall block traffic to and from the network that is identified to be potentially malicious. '	INT
97	'The system shall be able to identify wrong input. '	INT
98	'The system shall offer input validation.'	INT
101	'The system shall allow file type filtering to avoid the overloading of the normal flow information with unnecessary files. '	INT
103	'The system shall filter harmful websites against URLs of known harmful websites. '	INT
103	'The system shall prevent any media from being sent or received using Bluetooth. '	INT
104	' The system shall ensure the database containing keywords shall be protected against SQL Injection '	INT
1	'The system shall detect SQL Injection and XSS vulnerabilities for a given website or a web application'	INT
2	'The system shall detect SQL Injection and XSS vulnerabilities for a given website or a web application '	INT
4	'The system shall be used to detect the presence of malware in an Android application, identify possible malware families and classify them accordingly into their families. '	INT
4	'The system shall show a report containing detailed results found in files submitted for analysis and will clearly indicate which file is malicious and which one is benign. '	INT
4	'The system shall focus on known and unknown malware families with the aim of unearthing newly developed malware which are potentially harmful to the Android applications. '	INT
8	'The system shall be able to listen for any port scan on university WIFI network.'	INT
8	'The system shall be able to check netstat and recent network connections to see if rogue node is a victim of pivoting and if so trace the attacking machine. '	INT
8	'The system shall be able to note hostname of rogue node as well as the SSID of the network it is connected to so as to know from which section on campus is the attack being done. '	INT
8	'The system shall allow background processes to monitor for any scan and relay information to the registry about any unusual activities '	INT
14	'The system shall allow Network traffic monitoring in real-time by capturing incoming and outgoing TCP, HTTP(S) and TLS web traffic, in order to correlate it with configured cryptojacking blacklist. '	INT
14	The system shall analyse TCP, HTTP(S) and TLS web traffic, to detect network connections to known cryptocurrency mining pools or service providers such as BTC.com and coinhive.com '	INT
14	'The system shall monitor CPU usage to detect spikes caused by cryptojacking by constantly reading the computerís current CPU utilization percentage and compare it to the CPU usage baseline, and detect the extreme spikes or deviations from the usual. '	INT
14	'The system should be reliable in detecting known cryptojacking malware activity. '	INT
29	'The system should be able to sniff the traffic to and from the network in real timeí. '	INT
29	'The system should be able to analyze the network traffic and detects intrusion, attacks and threats to the network.'	INT
29	'The system is effective because it will detect normal attacks which current systems do not detect.'	INT
29	'The system will show the alert messages in case an anomaly has been detected and it will also show a panel of logs of the anomaly detected. '	INT
38	'The system must be able to deal with network threats on the computer it would be installed on. '	INT
38	'When packets come in through the NIC, the system should be able to detect traffic out of the norm. '	INT
38	'The system shall be detecting intrusions specific to a designated area of protection '	INT
38	'The system shall be detecting denial of service attacks to include service overloads, broadcast storms and also message flooding '	INT
42	'The system shall be able to detect spam messages and direct them to spam in real time '	INT
47	'The system functions as an IDS/IPD and aids in relieving traffic targeting the server, in the event that a distributed DOS attack occurs and the server is flooded with the requests and is therefore unable to provide its usual service(s) to the client. '	INT
48	'The system shall be able to detect SQL Injection and XSS vulnerabilities for a website or a web application. '	INT
48	'The system shall be able to analyse the detected vulnerability. '	INT
48	'The system shall be able to generate a report of the detected and analysed vulnerabilities. '	INT
48	'The system scanner may accept a certain number of URLS that should test them for selected vulnerabilities. '	INT
48	'The system should be able to carefully diagnose the real vulnerabilities when they exist based on conducting formula-based experiments. '	INT
51	'The system shall analyse and record suspicious packets signatures and detects an anomaly if the following packets data matches the recorded threat related signatures. '	INT
51	'The system shall use honeypot which records and analyses packets flowing through the network. A honeypot is a system decoy which is used to make the attacker believe that he/she is attacking the intended system. '	INT
54	'The system shall capture network traffic between the hypervisor and the subject/monitored virtual machine. '	INT
63	'The system shall allow a user to listen for any port scan on university WIFI network. '	INT
63	'The system shall allow background processes to be monitoring for any scan and relaying information to the registry about any unusual activities.'	INT
63	'The software will look at port scanning only on the host it will be deployed on, this will devote all the listen to one part of the many policies in a computer. '	INT
72	'The system finds indicators (patterns, attributes) of, or to exploit vulnerabilities known to exist, in the detected services / software versions'	INT
85	'The system shall report when a form of identity theft is noticed. '	INT
89	'The system shall notify administrators of a proxy requesting IP address or identity. '	INT
91	'The system shall allow for anomalies to be curbed after detection.'	INT
95	'The system shall be able to sniff the traffic to and from the network in real-time. '	INT
95	'The system shall analyse the network traffic and detects intrusion, attacks and threats to the network. '	INT
95	'The system shall be able to warn the network administrator about the possible occurrence of an intrusion attack and provide information regarding that attack.'	INT
95	'The system shall be able to detect novel attacks which current systems do not yet detect. '	INT
100	'The system shall be able to detect fraudulent transactions in rea-time. '	INT
105	'The system shall be capable of Malware detection and classify of both known and unknown Malware into their respective families. '	INT
105	'The system shall be able to detect and combat both existing and new Malware. '	INT
3	'Allow the user to check the integrity of stored data through the PDP NSR. '	INT
5	'The system shall allow a user to sign a document on behalf of the group using his secret key '	INT
6	'The system shall allow verification of watermarked image which is submitted twice or more by different authors to protect the ownerís copyrights '	INT
12	'The system shall allow a user to sign a document on behalf of the group using his secret key '	INT
19	'The information entered is only altered by the user upon authentication being done to verify. '	INT
19	'Permissions to access the system data should only be altered by the systemís data administrator.'	INT
19	'The proposed system shall provide access permissions for application data may only be changed by the systemís data administrator and data stored in the database to be hashed. '	INT
21	'The system should use hmac to maintain integrity of the log files and detect when file has been modified using the technology '	INT
21	'The system uses HMAC to maintain integrity of log files. '	INT
21	'The system shall ensure that a secure and effective interface is established to reduce the affiliated risk of errors from inaccurate data formats. '	INT
24	'The data provided by the system should be validated and verified were possible. '	INT
25	'The results from the scanning process must be reliable, which means minimum or no false positives'	INT
32	'The system shall allow the user to sign a document '	INT
41	'The system shall allow the user to check for data integrity using MD5 hash algorithm '	INT
41	'The system shall allow for checking data integrity '	INT
44	'The system should have the ability to validate entered data hence reducing redundancy and duplication in the database. '	INT
44	'Use of a central database to enable real time data capturing and manipulation to facilitate access to laptop details from any computer connected to the database. '	INT
44	'The system shall not permit input of wrong data type. '	INT
44	'The systems administrator should maintain the system and its databases to ensure integrity and availability of information.'	INT
53	'The system shall ensure that, as a watermark is an essential part of data, it must continue even after signal processing and data manipulation including malicious operation that endeavors to remove the watermark. '	INT
54	'The system shall preserve the integrity of acquired forensic imagines by applying integrity checksums and hashes. '	INT
58	'The system shall be able to allow the user to check the integrity of stored data through the PDP functionality. '	INT
58	'The system security shall add an extra layer of defense making it difficult for an adversary to successfully gain unauthorized access to the system and compromise the integrity of the stored data. '	INT
61	'The system shall enable the radiologist to verify the integrity of stored images through the PoR functionality. '	INT
72	'The system shall verify the SSL certificate on a given web server to make sure it†is correctly installed, valid, trusted and doesn't give any errors to any of the users.'	INT
73	'The system shall execute its tasks accurately when issued a command. Testing will ensure that all functions are properly included. '	INT
76	' To system shall allow changes to be made in an authorised manner '	INT
80	'The system shall ensure integrity and consistency in all its processes. '	INT
85	'The system shall process the data received and generate an md5 hash of the data. '	INT
85	'The system shall provide the integrity service through use of md5 hash values to prevent unauthorised modification '	INT
86	'The system shall allow only the legitimate user to modify stored information '	INT
92	'The system shall distribute authentic copies of each supplied video. '	INT
100	'The system shall enable authorised reversal of actions. '	INT
3	'The system shall be easy to maintain as it can easily be integrated with other systems, modified or reused on other different platforms, '	AVA
4	'The system shall apply a number of methods, such as regular maintenance, to facilitate reliability assurance of the system, '	AVA
5	'The system shall be easy to transfer to another environment, including install ability'	AVA
7	'The system shall have independent classes for databases so they can be maintained, tested and system improvements can be done easily '	AVA
8	'The system shall be updated with patches and newer versions when required'	AVA
11	'New exchange interfaces should be easily integrated into the already existing system without modifying core functionality of the product software. '	AVA
12	'The system shall ensure easy maintainability by enforcing best practices in documentation, applying complexity avoidance strategy, and following basic programming practices. '	AVA
13	'The system shall be maintainable by enforcing modularity which makes the system components loosely coupled such that they can be modified independently and then reintegrated into the system. '	AVA
13	'The system shall maintain a strict documentation including comments in the source code so as to make the code easy to modify and debugging. '	AVA
15	'The system shall be easy to maintain since the application has a clear separation of its database and logic code making it easy to sandbox the system and maintain it without affecting the whole system. '	AVA
15	'The system shall be maintained through frequent updates. '	AVA
16	'The system shall have a modular design catering for corrective, perfective, adaptive and preventive maintenance. '	AVA
20	'The system should be easy to maintain such that the modules should easily interact effectively and in case of failure, a re-initialization of the program is recommended. '	AVA
22	'The system shall allow for easy maintenance. '	AVA
22	'This system will be easy to maintain as it will be deployed with the documentation associated with it including code snippets which allows the project to be transferable to another maintenance or updating. '	AVA
24	'The system should be maintained properly so that it should be able to resolve any data conflicts and sustain at any condition. '	AVA
24	'The program coding should be well documented and laid out particularly to facilitate future upgrades and additional features being added at a later date. '	AVA
24	'The system should be developed with future upgrades and additional functionality being added to a later date '	AVA
24	'The system should be able to provide data for the current maximum number of tags presently two thousand for a period of thirty days in whatever format the user decides'	AVA
25	'The system must be scalable '	AVA
26	'The system components shall be expandable. '	AVA
29	'The system does not use much hardware and software, hence it is not costly to maintain the system and the system does not require maintenance regularly. '	AVA
29	'The system does not need frequent updates to its signatures as it will be learning on its own and updating its signatures on its own. '	AVA
30	'The system maintainability shall be implemented through the use of proper coding principles and practices such as putting comments in a proper, organized and standard manner in the program. '	AVA
30	'System modules will be loosely coupled to allow for easy maintainability when used by the users. '	AVA
31	'The system shall be able to handle a growing amount of work and also to be enlarged in order to accommodate that growth. '	AVA
32	'The system is easy to maintain as it offers modularity, understandability, changeability, testability, reusability and transferability from one team to another. '	AVA
33	'The system must allow scalability so as to perform legitimate modification of user data. '	AVA
33	'The system must be supported by the following characteristics, testability, adaptability, extensibility, serviceability and localizability. '	AVA
39	'The system should be maintained properly so that it should be able to resolve any data conflicts and sustain at any condition. '	AVA
39	'The program coding should be well documented and laid out particularly to facilitate future upgrades and additional functionality being added at a later date. '	AVA
39	'The system should be developed with future upgrades and additional functionality being added at a later date. '	AVA
40	'The system is deployed as an application on user machines thus it is cost-effective to maintain as it does not have many modules and online documentation including system documentation and test documentation for easy user acclimatization. '	AVA
42	'The system shall be able to be easily maintained and updated with new data that emerge since the spammers will be trying to bypass the filter with new tricks being employed. '	AVA
43	'The system should be easy to maintain and it should be modifiable.'	AVA
47	'The system will stand in-between the client and the server, however, it is associated within the serverís architecture. '	AVA
49	'The system will be divided into modules i.e downloader, trimmer, player to enhance the maintainability of the system and its troubleshooting '	AVA
54	'The Intrusion Detection module will be based on a tried and tested architecture and the same will apply to the memory acquisition tool, to avoid violating the proper coding principles as well as best practices for documentation. ''	AVA
55	'The system is a lightweight app which has all the algorithms and libraries engraved within itself for easy management of information which that app would be working with thus making its maintenance easy and simple. '	AVA
56	' The system shall be reliable as routine maintenance shall be done often. '	AVA
56	'The system will cater for its ability to be extended with more features and functionalities without compromising its original one or affecting the operations of the user. '	AVA
57	'The proposed system shall be designed such that any glitch can be fixed in no time to restore service to users and it will allow adding functionality easily. '	AVA
58	'The system is easy to maintain as it can easily be integrated with other systems, modified or reused on other different platforms '	AVA
60	'The system is able to automatically adapt to the email environment to constantly tune and improve spam detection. '	AVA
63	'The product can be corrected by updates, patches and with newer versions when required. '	AVA
79	'The system shall allow that as the number of patient records increases with time and the capacity of the system to hold these records must also increase as the records increase. '	AVA
80	'The system components shall be built with reusability so it can be integrated into other systems. '	AVA
81	'The system shall be clearly documented so as to allow easy maintenance on different environments on which the system will be installed. '	AVA
85	'The system shall be maintainable as it can be integrated with other systems easily, can be modified or have its components reused on other platforms.'	AVA
93	'The system shall be flexible and adapts to changes. '	AVA
95	'The system shall not require constant updating of its signature as it will be learning on its own and updating its signatures on its own. '	AVA
96	'The system shall be able to predict potential operational performance bottlenecks and future scalability problems.'	AVA
96	'The system shall be easy to maintain as it shall be built following best practices in documentation, complexity avoidance and good programming strategies. '	AVA
98	'The system shall employ good coding principles like loose coupling of modules for easy maintainance. '	AVA
101	'The system shall be simple and easy to maintain. '	AVA
103	'The system shall be able to adapt as new URLs and websites are added to those filtered as they emerge. '	AVA
104	'The system shall be scalable and able to handle growth in data flow leveraging the Twitter API capabilities. '	AVA
105	'The system shall be maintainable as it is built with three modules with commands that avoid violating coding principles '	AVA
11	'The system shall allow for a safe fail whenever there is a fault. '	AVA
11	'The system shall provide maturity, fault tolerance and recoverability in the face of a fault. '	AVA
12	'The system shall provide maturity, fault tolerance and recoverability despite the challenges of balancing development time. '	AVA
22	'The system make use of stored procedures '	INT
22	'The system shall provide maturity, fault tolerance and recoverability.'	AVA
24	'The system shall have fault tolerance and shall have ability to do a safe exit of the program if a problem is encountered '	AVA
24	'The system should pertain to all the situations so that it can be recoverable in any error conditions. '	AVA
26	'The system survives under its boundaries, which also sets limits to its operations, and the limits make up the restrictions. '	INT
28	'The system shall allow individual facility servers to remain unaffected when the central server fails. '	INT
28	'The system shall ensure that the central server remain unaffected when the institutes system fails. '	INT
33	'The system adapts to all types of application and provides maturity, fault tolerance and recoverability. '	AVA
33	'The static attributes of the system predict potential operational performance bottlenecks and future scalability problems early to allow for correction early. '	AVA
39	'The system should pertain to all the situations so that it can be recoverable in any error conditions. '	AVA
43	'The system shall provide all the internal users a backup of the operational and transactional data. '	INT
44	'The system database should be backed up continuously at least once every for hour in order to minimize data loss in the case of a catastrophic failure. '	INT
45	'System must allow clients to run a separate routing protocol from one in ISP network. '	INT
55	'The system shall provide file type filtering so as to avoid overloading the normal flow information with unnecessary files. '	AVA
55	'The system offers little room for a delayed data transmissions and system failures due to error handling procedures and feedbacks. '	AVA
59	'The system shall reduce the occurrence of failure in the system. '	AVA
62	'The system database must be located in a special secure server and must be backups to other servers directly at specific times to avoid loss and damage of data '	INT
65	'The system should allow for quick error recovery. '	AVA
66	'The system should allow room for quick error recovery. '	AVA
67	'The system should allow for quick error recovery. '	AVA
69	'The system will be used at a national level offering reliability, however, it is hard to balance development time but it provides maturity, fault tolerance and recoverability. '	AVA
70	'The system should allow for error recovery. '	AVA
75	'The system shall enable data multiple replications. '	INT
89	'The system shall ensure that the firewall should be able to withstand any load of traffic given to it and be able to filter it efficiently. '	INT
94	'The system shall encompass factors of complex computations, robustness and security. '	AVA
94	'The system shall ensure that the watermark as an essential part of the data remains even after signal processing and data manipulation including any malicious activity '	INT
95	'The system shall guarantee reliability and resilient to failure '	AVA
97	'The system shall allow room for error recovery '	AVA
98	'The system shall provide reliability and fault tolerance through extensive stress testing '	AVA
100	'The system shall allow for error recovery. '	AVA
100	'The system shall offer error handling capabilities. '	AVA
5	'The Zimbabwe Anti-Corruption Commission then verifies the signature using the group public key so that it will be convinced that it actually came from the organisation without the knowledge of the actual signer'	CON
6	'The system shall apply the principle of authentication by notifying if there is a watermark on the image or not '	CON
8	'The system shall be able to authenticate pin entered. '	CON
12	'The system shall allow the Zimbabwe Anti-Corruption Commission to verify the signature using the group public key so that it will be convinced that it actually came from the organisation without the knowledge of the actual signer '	CON
14	'The system shall allow the user to set an email-change password, so that it will subsequently be requested when attempting to change the set userís email address. '	CON
15	'The system shall use a two-way authentication system by combining keyboard activities and mouse movement biometrics to improve security.'	CON
15	'The system shall allow that the features be extracted when the user logs in and a similarity match done to check the authenticity of the user and if a match is successful the user will be granted access or denied in the event of a mismatch. '	CON
15	'The system shall be able to distinguish the legitimate user from an illegitimate one by the use of unique behavioral biometrics '	CON
18	'The system should restrict password attempts to three only. '	CON
19	'The system should be able to carry out authentication of the user through user name and password '	CON
19	'The system should time out after a set period of inactivity'	CON
19	'The system shall enforce security through the use of password protected user accounts '	CON
20	'The system shall allow users to enter their usernames and passwords. '	CON
20	'The system shall be able to detect whether the input credentials are authentic, then accept or else reject if the credentials are incorrect. '	CON
20	'This system provides functionality of verifying userí login credentials against the ones stored in the system.'	CON
20	The system shall ensure that if login credentials are valid, the flow control of the user logging in will pass into the system, otherwise it directs the user back to the login page, and if no information is found, the user should input another licence number, or vehicle registration number.	CON
20	'The system shall allow the user to create an account on the system and logs in using fingerprint. '	CON
20	'The system shall prompt for a password to log in to access the services '	CON
21	'The system shall allow users to have their own user specific key that is generated by the machine and has been added to the list of keys for the MAC generation process '	CON
23	'The system shall allow user validation to be done during login to ensure that the user is who they claim to be '	CON
26	'The system user with privileges should input password and be able to log into the system.'	CON
27	'The system shall apply a mechanism to establish proof of identities, to verify who a particular user is. '	CON
27	'The system shall provide Bluetooth authentication so that users do not need to disable laptop authentication as they have to frequently unlock the laptop during office working hours.'	CON
28	'The system should be able to match fingerprint at login. '	CON
29	'The system shall have a log in screen to allow the network administrator to log into the system'	CON
30	'The system shall have log in and logout capabilities which can be seen as the line of security which most systems should possess for authentication and accountability purposes. '	CON
32	'The system shall enable verifying of the signature using the group public key so that it will be convinced that it actually came from the organization without the knowledge of the actual singer. '	CON
34	'The system shall be able to enable payment which will have 2 factor authentication (static password and OTP) '	CON
34	'The system shall be able to authenticate the username and password '	CON
36	'The system shall be able to authenticate users so that any unauthorized persons should not be granted by the system '	CON
37	'The system should be able to match current faceprint with the faceprints in database '	CON
37	'The system should be able to match RFID card/tag id with the userís face/person id to make for access to be granted '	CON
37	'The system should be able to reject access to the person who presents the tag that belongs to someone else in high probability '	CON
41	'The system shall send a one-time password to the user phone for the completion of the login process '	CON
42	'The system shall be able to ensure the information provided include a unique username, password and some personal details which are needed to verify that the user is eligible to create an account. '	CON
42	' The system shall have an optional email field for recovery in case one forgets password the reset link will be sent to that email with instructions '	CON
42	'The system login page is for already existing users where they provide their unique username and password for verification and once the details are verified they are redirected to mailbox. '	CON
44	'Each user is to be configured with a unique User Name and a password that can be changed when it is necessary. '	CON
44	'Use of passwords to control access to data to reduce corruption and preserve confidentiality. '	CON
45	'The system shall require a password to login the Provider Routers. '	CON
45	'The system shall ask user to provide password. '	CON
46	'The system shall ensure that the authentication server interact with the database to check for registered user from the database '	CON
46	'The system shall allow a lookup of registered users if requested by the authentication server. '	CON
47	'The system shall provide authentication service which is tested when logging into the Django admin panel (back-end) of the system when the user logs into the system by entering credentials created from command prompt when running the manage code. '	CON
52	'The system will ensure user validation will be done during login to insure that the user is valid and that the user only has access to his or her permission data. '	CON
53	'The system principle of authentication applies in that the system notifies if there is a watermark on the image or not. '	CON
54	'The system shall provide access control to the user interface. '	CON
55	'The system shall provide log in and logout capabilities which can be seen as the first line of security which most systems should possess for authentication and accountability purposes. '	CON
56	'The system shall be able to authenticate pin entered. '	CON
56	'The system can be configured to work with a camera, a PC and other access control system to enhance multiple factor authentication. '	CON
58	'The proposed system is meant to use a two-factor user authentication system which ensures that only the registered and legitimate user is able to access the system and upload or view the data. '	CON
58	'The system shall ensure that once the account holder has provided a correct login password, he or she will receive a OTP or code sent either via the email or via the data ownerís mobile phone depending on their settings. '	CON
59	'The system shall implement authentication using PKI. '	CON
59	'The system shall allow a user to log into system and authenticated. '	CON
59	'The system shall allow a user to be authenticated through the use of digitally signed certificates, and again single-sign-on functionality will be fused into the system to allow once off authentication as long as the session is deemed active and valid. '	CON
59	'The system shall allow user authentication process to be done through trusted parties via the internet '	CON
64	'The system allows user re-verification by the usage of AVS and distinct security questions. '	CON
72	'The system connects to web application server and displays the results of the SSL connection including what SSL certificate is installed and whether it gives out the correct intermediate certificates. '	CON
72	'The system shall give the user an option to reset a forgotten password of an existing username by e-mail. '	CON
72	'The system users shall be able to access the system using an existing hard to guess password. '	CON
72	'The system ensures that the user is properly authenticated for every system access. '	CON
74	'Employees shall be identified by a 6 character password. '	CON
77	'The transactionís digital signatures are validated by the Ethereum protocol.'	CON
77	'The transaction data is validated by the smart contract. '	CON
78	'The system shall prompt the user to identify themselves by supplying a username and password. '	CON
80	'The system shall allow the administrator to log in to access the system. '	CON
80	'The system shall enable facial recognition. '	CON
80	'The system shall enable face identification through details about that person if he/she is an employee.'	CON
81	'The system shall allow users to answer questions on their profile after they are requested to fill in questions at registration which will be used as challenge questions when password is forgotten. '	CON
81	'The system shall allow users to download files when they want to use them upon answering correctly the randomly generated questions from their profiles. '	CON
82	'The system shall allow the student to experience single sign on across the universityís web services. '	CON
82	'The system shall provide a secure student authentication and authorisation by using security SAML tokens containing assertions about a subject for communication between trusted parties. '	CON
86	'The system shall generate Using Time-based Passwords via the Google- Authenticator Application. '	CON
86	'The system shall authenticate the user with username and password. '	CON
86	'The system shall validate user passwords. '	CON
86	'The system shall ensure that the password is verifiable whenever they want to log in '	CON
86	'The system shall allow the bank server to verify the credentials of users when logging in for a short period of time. '	CON
86	'The system server shall generate the TOTP value that lasts for the specified amount of time. '	CON
86	'The system generated TOTP shall be a unique passcode that changes after an interval of 30 seconds. '	CON
86	'The system shall enable password changing in a specified time.'	CON
87	'The system shall allow a user to log into his or her own account providing his or her own email address and password. '	CON
87	'The system shall provide authentication service for all users before they can be allowed to embed a watermark through use of an email client. '	CON
88	' The system shall authenticate all users.'	CON
88	'The system shall provide Two Factor Authentication. '	CON
90	'The system shall use QR codes to facilitate access granting. '	CON
91	'The system shall perform user re-verification using AVS and distinct security questions. '	CON
93	'The system shall offer user authentication before any user is granted access to the services. '	CON
93	'The system shall provide Two Factor Authentication. '	CON
94	'The system shall provide authentication by ensuring that the agents compare the watermark keys on the detected images with the keys already stored in the agencyís database. '	CON
96	'The system shall allow a member to spontaneously form a group of n signers using group public keys which associate the group members. '	CON
96	'The system shall allow the recipient to verify the signature using the group public key so that they will be convinced that it actually came from the organisation without the knowledge of the actual signer. '	CON
98	'The system shall have log in and log out capabilities which can be seen as the first line of security which most systems should possess for authentication and accountability purposes. '	CON
100	'The system shall enforce that all users login before they can access the system. '	CON
104	'The system shall allow a user who has a Twitter account to create an application to access tokens. '	CON
8	'The system shall be able to open the door when the pin is correct '	CON
11	'The system shall provide an escrow (PayNow linked to Zimbabwean commercial banks and mobile money platforms) that locks USD until confirmation from seller. '	CON
14	'The system should ensure only the authorized user is able to change the registered email address for receiving cryptojacking alerts. '	CON
15	'The system shall ensure that confidential information can only be accessed to the right individuals. '	CON
16	'The system shall perform verification to determine user and access rights. '	CON
20	'The system shall allow the user to be directed to the options page or back to the login page for retrial. '	CON
20	'The system shall be able to determine whether the login credentials are valid or not, and search for matching results of the particular licence owner, or vehicle information. '	CON
20	'The system shall provide access to sensitive information only to the privileged user '	CON
20	'The system shall display the licence ownerís profile, and the vehicle information'	CON
23	'The system should offer a secure single sign-on platform, which will give access to different application that the user is entitled to access. '	CON
23	'The system shall allow that the user only has access to his or her permitted data. '	CON
26	'The system shall allow use of passwords and usernames to access and modify data '	CON
28	'The system should allow certified medical facilities to access critical patient information as needed. '	CON
28	'The system shall allow approved certified health providers to append information into the encrypted central server. '	CON
28	'The system shall allow for access levels to be implemented on patient information. '	CON
29	'The system should allow only those who are authorized to used and access the system and they will have to log in first to use the system. '	CON
34	'The system shall be able to allow a user to register and sign in for the blood recipient '	CON
35	'The system should only grant access to legitimate users and in the defined stamp. '	CON
37	'The system shall authenticate all users and grant access only to authorized users, to prevent unauthorized access to admin console '	CON
37	'The proposed system will allow only a registered user to be granted access into some restricted zones within the organization. '	CON
37	'The system enforces security administration to manage all the rights to the system features. '	CON
41	'The system shall offer high level security, as it shall give access to authorized users only, '	CON
42	'The system shall be able to ensure the user access controls will be put in place to restrict unauthorized users to access user accounts '	CON
43	'The system shall provide administrator with security to data to make sure that unauthorized users do not access the information. '	CON
44	'The system should have access control mechanism that take into account the use of passwords and individuals access rights. '	CON
44	'The system super administrator should be able to grant access privilege to users and restrict access of information and data users can view or modify at any given time. '	CON
44	'The system should allow use of stringent passwords and different view levels to control access to data to reduce electronic fraudulent activities and unauthorized access to data. '	CON
44	'The system must have a log on feature limiting individual uses to those functions they have a need to access according to their responsibilities. '	CON
45	'The system shall ensure device in one ODPF area must not communicate with another in a different OSPF area. '	CON
50	'The system shall allow authorized user to edit patient details.'	CON
57	' The system shall offer authentication, authorization, configuration management to prevent access to admin console. '	CON
59	'The system shall allow a user to register through sponsorship from relevant Human Resources. '	CON
59	'The system shall allow a user to view content or dashboard. '	CON
59	'The system shall allow a user to manage their own password. '	CON
61	'System shall provide access only to legitimate users, resist unathorised users, accidental or unintended usage. '	CON
69	'The system is a very secure system with log on credentials allowing access to only authorised members. It ensures that information is kept secured at every moment and only the right people have access to records. '	CON
76	'The system shall be able to show clients KYC information to authorised users. '	CON
78	'The system shall allow the administrator to assign roles to users. '	CON
81	'The system shall allow people to connect to their accounts after they initially register with the system and sign in to access it. '	CON
81	'The system shall allow authorised users to manage their files that is update and delete data from their accounts. '	CON
81	'The system shall allow only authorised users to access information and it shall protect usersí data from intruders. '	CON
82	'The system shall be able to allocate resources to the actual student who has requested the service. '	CON
86	'The system shall allow a user to register and log in. '	CON
87	'The system shall be given a platform to select a unique watermark that will be inserted onto a document to protect data by providing ownership to the rightful people. '	CON
87	'The system shall allow an authenticated user to insert a watermark on a document which will be in PDF format. '	CON
87	'The system shall prevent manipulation of the watermark by an unauthorised user. '	CON
88	'The system shall allow files to be accessible only to authorised personnel.'	CON
89	'The system shall resist unauthorised, accidental or unintended usage and provide access only to legitimate users. '	CON
89	'The system shall allow administrator to view IP address. '	CON
89	'The system shall allow administrator to make changes. '	CON
90	'The system shall allow the framework executive to sign on to the site keeping in mind the end goal to see the warning messages. '	CON
92	'The system shall restrict illegal sharing of video content protected by copyright providing a secure algorithm for downloading and playback. '	CON
92	'The system shall ensure that the user can only download if registered with the server. '	CON
92	'The system shall give each user who purchases a copy of a video a lifetime access right to authentic copy the video. '	CON
92	'The system shall deny access to unauthorised users to redistribute the copy they legally purchase. '	CON
94	'The system shall ensure that the communication of the agents and the agency or server is such that only the registered agents can report to the agency. '	CON
95	'The system shall allow access to authorised users only. '	CON
96	'The system shall allow a user to sign a document on behalf of the group using their secret key. '	CON
97	'The system shall ensure that only authorised users are granted access. '	CON
102	'The system shall enable the systems administrator to log on to the website in order to view the notification messages. '	CON
